# Supplementary material for: Quantifying Condition-Dependent Intracellular Protein Levels Enables High-Precision Fitness Estimates
Source: PubMed Central journal article supplement (PMC3783400; doi:10.1371/journal.pone.0075320), 2013-09-25
Supplement: pone.0075320.s002.pdf [file pone.0075320.s002.pdf]

Observed fold change in protein abundance (log scale)

Ura3m1

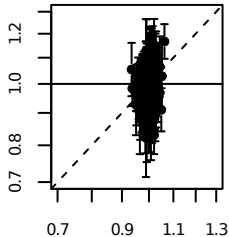

YFPm2

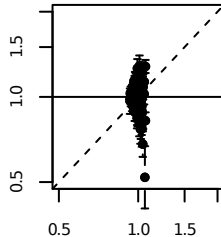

YFPm3

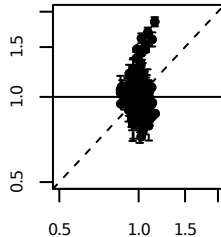

YFPm4

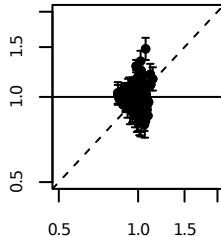

Expected fold change in protein abundance (log scale)
