# Supplementary material for: Quantifying Condition-Dependent Intracellular Protein Levels Enables High-Precision Fitness Estimates
Source: PubMed Central journal article supplement (PMC3783400; doi:10.1371/journal.pone.0075320), 2013-09-25

A

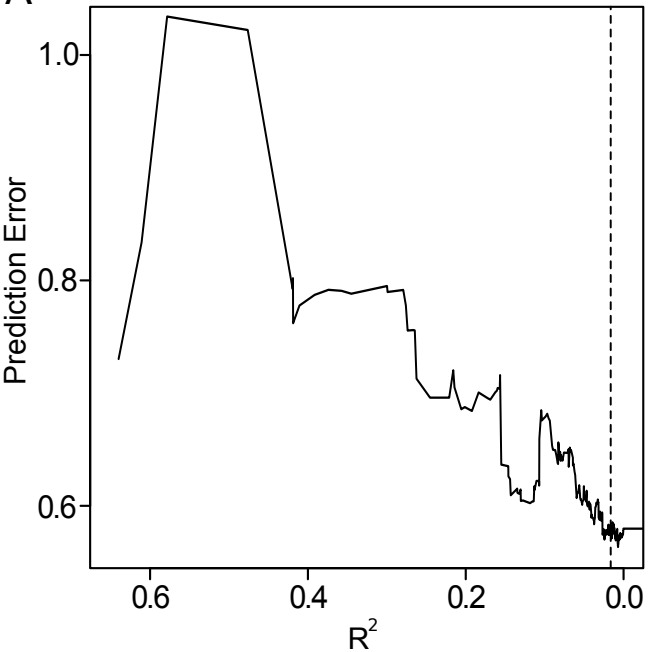

B

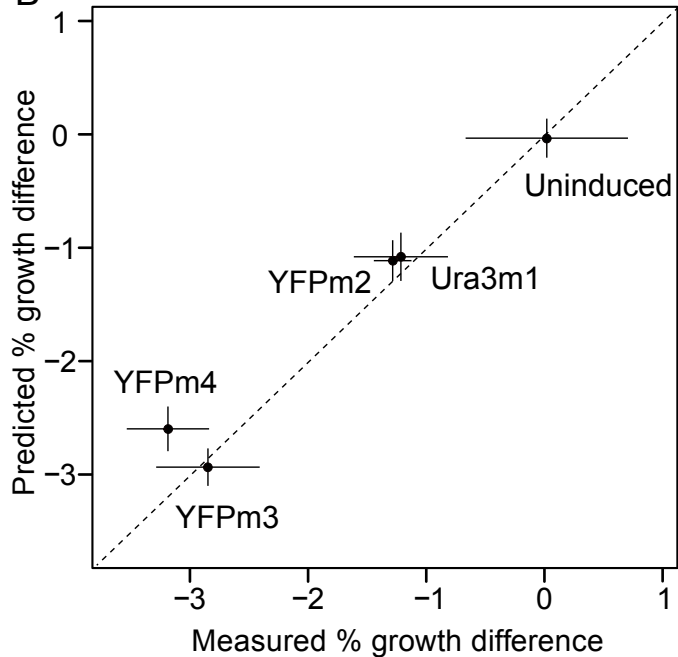

Supplement: pone.0075320.s004.pdf [file pone.0075320.s004.pdf]
