# Supplementary material for: Quantifying Condition-Dependent Intracellular Protein Levels Enables High-Precision Fitness Estimates
Source: PLoS One. 2013 Sep 25;8(9):e75320. doi: 10.1371/journal.pone.0075320 (PMC3783400; doi:10.1371/journal.pone.0075320)
Supplement: Table S1 — This table shows all of the relative protein abundance measurements collected for this study from every mass spectrometry run. From each replicate experiment, we include only those proteins that were detected at least four times. (XLSX) [file pone.0075320.s006.xlsx]

## Sheet: new_FINAL_Protein_List.txt
Proteins	Experimental.Condition	Ratio	Raw.File	Strains	Relative Growth Difference %
Q0140	Uninduced	1.07022	31967	YFPwt_YFPm3	0
R0020C	Uninduced	1.0668	31967	YFPwt_YFPm3	0
UBIQUITIN	Uninduced	1.12653	31967	YFPwt_YFPm3	0
UBIQUITIN	Uninduced	1.02539	31967	YFPwt_YFPm3	0
UBIQUITIN	Uninduced	1.01673	31967	YFPwt_YFPm3	0
UBIQUITIN	Uninduced	1.00464	31967	YFPwt_YFPm3	0
UBIQUITIN	Uninduced	0.990884	31967	YFPwt_YFPm3	0
UBIQUITIN	Uninduced	0.933794	31967	YFPwt_YFPm3	0
UBIQUITIN	Uninduced	0.775916	31967	YFPwt_YFPm3	0
UBIQUITIN	Uninduced	0.0432432	31967	YFPwt_YFPm3	0
YAL003W	Uninduced	1.28573	31967	YFPwt_YFPm3	0
YAL003W	Uninduced	1.25109	31967	YFPwt_YFPm3	0
YAL003W	Uninduced	1.16617	31967	YFPwt_YFPm3	0
YAL003W	Uninduced	1.15339	31967	YFPwt_YFPm3	0
YAL003W	Uninduced	1.15091	31967	YFPwt_YFPm3	0
YAL003W	Uninduced	1.0661	31967	YFPwt_YFPm3	0
YAL003W	Uninduced	1.00732	31967	YFPwt_YFPm3	0
YAL003W	Uninduced	0.993739	31967	YFPwt_YFPm3	0
YAL003W	Uninduced	0.877578	31967	YFPwt_YFPm3	0
YAL003W	Uninduced	0.866176	31967	YFPwt_YFPm3	0
YAL003W	Uninduced	0.863782	31967	YFPwt_YFPm3	0
YAL003W	Uninduced	0.844951	31967	YFPwt_YFPm3	0
YAL003W	Uninduced	0.840972	31967	YFPwt_YFPm3	0
YAL003W	Uninduced	0.8364	31967	YFPwt_YFPm3	0
YAL003W	Uninduced	0.815794	31967	YFPwt_YFPm3	0
YAL003W	Uninduced	0.724323	31967	YFPwt_YFPm3	0
YAL003W	Uninduced	0.705219	31967	YFPwt_YFPm3	0
YAL005C	Uninduced	1.32834	31967	YFPwt_YFPm3	0
YAL005C	Uninduced	1.09795	31967	YFPwt_YFPm3	0
YAL005C	Uninduced	1.01299	31967	YFPwt_YFPm3	0
YAL005C	Uninduced	0.993542	31967	YFPwt_YFPm3	0
YAL005C	Uninduced	0.987654	31967	YFPwt_YFPm3	0
YAL005C	Uninduced	0.981547	31967	YFPwt_YFPm3	0
YAL005C	Uninduced	0.968523	31967	YFPwt_YFPm3	0
YAL005C	Uninduced	0.943129	31967	YFPwt_YFPm3	0
YAL005C	Uninduced	0.923446	31967	YFPwt_YFPm3	0
YAL005C	Uninduced	0.895576	31967	YFPwt_YFPm3	0
YAL005C	Uninduced	0.872524	31967	YFPwt_YFPm3	0
YAL005C	Uninduced	0.869036	31967	YFPwt_YFPm3	0
YAL005C	Uninduced	0.863185	31967	YFPwt_YFPm3	0
YAL005C	Uninduced	0.623286	31967	YFPwt_YFPm3	0
YAL005C;YBL075C;YER103W;YLL024C	Uninduced	0.905141	31967	YFPwt_YFPm3	0
YAL005C;YER103W;YLL024C	Uninduced	0.982415	31967	YFPwt_YFPm3	0
YAL005C;YER103W;YLL024C	Uninduced	0.933881	31967	YFPwt_YFPm3	0
YAL005C;YLL024C	Uninduced	1.35225	31967	YFPwt_YFPm3	0
YAL005C;YLL024C	Uninduced	1.27907	31967	YFPwt_YFPm3	0
YAL005C;YLL024C	Uninduced	1.14009	31967	YFPwt_YFPm3	0
YAL005C;YLL024C	Uninduced	1.0819	31967	YFPwt_YFPm3	0
YAL005C;YLL024C	Uninduced	1.01518	31967	YFPwt_YFPm3	0
YAL005C;YLL024C	Uninduced	1.00036	31967	YFPwt_YFPm3	0
YAL005C;YLL024C	Uninduced	0.984446	31967	YFPwt_YFPm3	0
YAL005C;YLL024C	Uninduced	0.978857	31967	YFPwt_YFPm3	0
YAL005C;YLL024C	Uninduced	0.977995	31967	YFPwt_YFPm3	0
YAL005C;YLL024C	Uninduced	0.974564	31967	YFPwt_YFPm3	0
YAL005C;YLL024C	Uninduced	0.972952	31967	YFPwt_YFPm3	0
YAL005C;YLL024C	Uninduced	0.97078	31967	YFPwt_YFPm3	0
YAL005C;YLL024C	Uninduced	0.966184	31967	YFPwt_YFPm3	0
YAL005C;YLL024C	Uninduced	0.963948	31967	YFPwt_YFPm3	0
YAL005C;YLL024C	Uninduced	0.950661	31967	YFPwt_YFPm3	0
YAL005C;YLL024C	Uninduced	0.920556	31967	YFPwt_YFPm3	0
YAL005C;YLL024C	Uninduced	0.917684	31967	YFPwt_YFPm3	0
YAL005C;YLL024C	Uninduced	0.914829	31967	YFPwt_YFPm3	0
YAL005C;YLL024C	Uninduced	0.865202	31967	YFPwt_YFPm3	0
YAL007C	Uninduced	0.934492	31967	YFPwt_YFPm3	0
YAL012W	Uninduced	1.13724	31967	YFPwt_YFPm3	0
YAL012W	Uninduced	1.06448	31967	YFPwt_YFPm3	0
YAL012W	Uninduced	1.0163	31967	YFPwt_YFPm3	0
YAL012W	Uninduced	0.977613	31967	YFPwt_YFPm3	0
YAL012W	Uninduced	0.930146	31967	YFPwt_YFPm3	0
YAL012W	Uninduced	0.879585	31967	YFPwt_YFPm3	0
YAL012W	Uninduced	0.8285	31967	YFPwt_YFPm3	0
YAL016W	Uninduced	1.40178	31967	YFPwt_YFPm3	0
YAL016W	Uninduced	1.30009	31967	YFPwt_YFPm3	0
YAL016W	Uninduced	0.795862	31967	YFPwt_YFPm3	0
YAL016W	Uninduced	0.58651	31967	YFPwt_YFPm3	0
YAL017W	Uninduced	1.10557	31967	YFPwt_YFPm3	0
YAL019W	Uninduced	1.65815	31967	YFPwt_YFPm3	0
YAL035W	Uninduced	1.20188	31967	YFPwt_YFPm3	0
YAL035W	Uninduced	1.136	31967	YFPwt_YFPm3	0
YAL035W	Uninduced	0.992654	31967	YFPwt_YFPm3	0
YAL035W	Uninduced	0.88098	31967	YFPwt_YFPm3	0
YAL035W	Uninduced	0.70028	31967	YFPwt_YFPm3	0
YAL036C	Uninduced	0.663438	31967	YFPwt_YFPm3	0
YAL036C	Uninduced	0.543537	31967	YFPwt_YFPm3	0
YAL038W	Uninduced	4.06769	31967	YFPwt_YFPm3	0
YAL038W	Uninduced	1.37197	31967	YFPwt_YFPm3	0
YAL038W	Uninduced	1.36711	31967	YFPwt_YFPm3	0
YAL038W	Uninduced	1.36197	31967	YFPwt_YFPm3	0
YAL038W	Uninduced	1.29906	31967	YFPwt_YFPm3	0
YAL038W	Uninduced	1.19806	31967	YFPwt_YFPm3	0
YAL038W	Uninduced	1.136	31967	YFPwt_YFPm3	0
YAL038W	Uninduced	1.12745	31967	YFPwt_YFPm3	0
YAL038W	Uninduced	1.12453	31967	YFPwt_YFPm3	0
YAL038W	Uninduced	1.0902	31967	YFPwt_YFPm3	0
YAL038W	Uninduced	1.04214	31967	YFPwt_YFPm3	0
YAL038W	Uninduced	1.03936	31967	YFPwt_YFPm3	0
YAL038W	Uninduced	1.03161	31967	YFPwt_YFPm3	0
YAL038W	Uninduced	0.997108	31967	YFPwt_YFPm3	0
YAL038W	Uninduced	0.990491	31967	YFPwt_YFPm3	0
YAL038W	Uninduced	0.986291	31967	YFPwt_YFPm3	0
YAL038W	Uninduced	0.954927	31967	YFPwt_YFPm3	0
YAL038W	Uninduced	0.947867	31967	YFPwt_YFPm3	0
YAL038W	Uninduced	0.934842	31967	YFPwt_YFPm3	0
YAL038W	Uninduced	0.926097	31967	YFPwt_YFPm3	0
YAL039C	Uninduced	1.10627	31967	YFPwt_YFPm3	0
YAL042W	Uninduced	8.8968	31967	YFPwt_YFPm3	0
YAL042W	Uninduced	1.02715	31967	YFPwt_YFPm3	0
YAL044C	Uninduced	1.09371	31967	YFPwt_YFPm3	0
YAL044C	Uninduced	1.0421	31967	YFPwt_YFPm3	0
YAL044C	Uninduced	0.905305	31967	YFPwt_YFPm3	0
YAL044C	Uninduced	0.904814	31967	YFPwt_YFPm3	0
YAL047C	Uninduced	0.989413	31967	YFPwt_YFPm3	0
YAL049C	Uninduced	1.31046	31967	YFPwt_YFPm3	0
YAL054C	Uninduced	0.865426	31967	YFPwt_YFPm3	0
YAL060W	Uninduced	1.47169	31967	YFPwt_YFPm3	0
YAL060W	Uninduced	1.47098	31967	YFPwt_YFPm3	0
YAL060W	Uninduced	0.703037	31967	YFPwt_YFPm3	0
YAR002C-A	Uninduced	1.09901	31967	YFPwt_YFPm3	0
YAR002C-A	Uninduced	0.657765	31967	YFPwt_YFPm3	0
YAR002C-A	Uninduced	0.110546	31967	YFPwt_YFPm3	0
YAR002W	Uninduced	0.83091	31967	YFPwt_YFPm3	0
YAR007C	Uninduced	1.00505	31967	YFPwt_YFPm3	0
YAR007C	Uninduced	0.839278	31967	YFPwt_YFPm3	0
YAR010C;YDR261C-C;YPR137C-A;YML045W-A;YDR365W-A;YER137C-A;YLR157C-A;YPL257W-A;YLR256W-A;YER138C;YLR157C-B;YPL257W-B;YDR261C-D;YML045W;YML039W;YJR029W;YGR027W-B;YOL103W-B;YPR137C-B;YPR158C-D;YPR158W-B;YDR316W-B;YMR050C;YOR142W-B;YHR214C-B;YGR161C-D;YBR012W-B;YER160C	Uninduced	1.17302	31967	YFPwt_YFPm3	0
YAR010C;YDR261C-C;YPR137C-A;YML045W-A;YNL054W-A;YDR365W-A;YER137C-A;YLR157C-A;YPL257W-A;YLR256W-A;YER138C;YLR157C-B;YPL257W-B;YDR261C-D;YML045W;YML039W;YJR029W;YGR027W-B;YOL103W-B;YPR137C-B;YNL054W-B;YPR158C-D;YPR158W-B;YDR316W-B;YMR050C;YOR142W-B;YHR214C-B;YGR161C-D;YBR012W-B;YER160C	Uninduced	1.0803	31967	YFPwt_YFPm3	0
YAR010C;YDR261C-C;YPR137C-A;YML045W-A;YNL054W-A;YDR365W-A;YER137C-A;YLR157C-A;YPL257W-A;YLR256W-A;YER138C;YLR157C-B;YPL257W-B;YDR261C-D;YML045W;YML039W;YJR029W;YGR027W-B;YOL103W-B;YPR137C-B;YNL054W-B;YPR158C-D;YPR158W-B;YDR316W-B;YMR050C;YOR142W-B;YHR214C-B;YGR161C-D;YBR012W-B;YER160C	Uninduced	0.975515	31967	YFPwt_YFPm3	0
YAR010C;YDR261C-C;YPR137C-A;YML045W-A;YNL054W-A;YDR365W-A;YER137C-A;YLR157C-A;YPL257W-A;YLR256W-A;YER138C;YLR157C-B;YPL257W-B;YDR261C-D;YML045W;YML039W;YJR029W;YGR027W-B;YOL103W-B;YPR137C-B;YNL054W-B;YPR158C-D;YPR158W-B;YDR316W-B;YMR050C;YOR142W-B;YHR214C-B;YGR161C-D;YBR012W-B;YER160C	Uninduced	0.931185	31967	YFPwt_YFPm3	0
YAR010C;YDR261C-C;YPR137C-A;YML045W-A;YNL054W-A;YDR365W-A;YER137C-A;YLR157C-A;YPL257W-A;YLR256W-A;YER138C;YLR157C-B;YPL257W-B;YDR261C-D;YML045W;YML039W;YJR029W;YGR027W-B;YOL103W-B;YPR137C-B;YNL054W-B;YPR158C-D;YPR158W-B;YDR316W-B;YMR050C;YOR142W-B;YHR214C-B;YGR161C-D;YBR012W-B;YER160C;YMR045C;YBL005W-B;YMR046C;YBL005W-A	Uninduced	1.05585	31967	YFPwt_YFPm3	0
YAR010C;YDR261C-C;YPR137C-A;YML045W-A;YNL054W-A;YDR365W-A;YER137C-A;YLR157C-A;YPL257W-A;YLR256W-A;YER138C;YLR157C-B;YPL257W-B;YDR261C-D;YML045W;YML039W;YJR029W;YGR027W-B;YPR137C-B;YNL054W-B;YPR158C-D;YPR158W-B;YDR316W-B;YMR050C;YOR142W-B;YHR214C-B;YGR161C-D;YBR012W-B;YER160C	Uninduced	1.02737	31967	YFPwt_YFPm3	0
YAR010C;YDR261C-C;YPR137C-A;YML045W-A;YNL054W-A;YDR365W-A;YER137C-A;YLR157C-A;YPL257W-A;YLR256W-A;YER138C;YLR157C-B;YPL257W-B;YDR261C-D;YML045W;YML039W;YJR029W;YGR027W-B;YPR137C-B;YNL054W-B;YPR158C-D;YPR158W-B;YDR316W-B;YMR050C;YOR142W-B;YHR214C-B;YGR161C-D;YBR012W-B;YER160C	Uninduced	1.02583	31967	YFPwt_YFPm3	0
YAR010C;YDR261C-C;YPR137C-A;YML045W-A;YNL054W-A;YDR365W-A;YER137C-A;YLR157C-A;YPL257W-A;YLR256W-A;YER138C;YLR157C-B;YPL257W-B;YDR261C-D;YML045W;YML039W;YJR029W;YGR027W-B;YPR137C-B;YNL054W-B;YPR158C-D;YPR158W-B;YDR316W-B;YMR050C;YOR142W-B;YHR214C-B;YGR161C-D;YBR012W-B;YER160C	Uninduced	0.604558	31967	YFPwt_YFPm3	0
YAR010C;YDR261C-C;YPR137C-A;YNL054W-A;YDR365W-A;YER137C-A;YLR157C-A;YPL257W-A;YNL284C-A;YER138C;YLR157C-B;YPL257W-B;YDR261C-D;YNL284C-B;YPR137C-B;YNL054W-B;YMR045C;YMR046C	Uninduced	1.07759	31967	YFPwt_YFPm3	0
YAR015W	Uninduced	2.03978	31967	YFPwt_YFPm3	0
YAR015W	Uninduced	1.11774	31967	YFPwt_YFPm3	0
YAR015W	Uninduced	0.844523	31967	YFPwt_YFPm3	0
YBL002W;YDR224C	Uninduced	0.972479	31967	YFPwt_YFPm3	0
YBL002W;YDR224C	Uninduced	0.813074	31967	YFPwt_YFPm3	0
YBL003C;YDR225W	Uninduced	1.35875	31967	YFPwt_YFPm3	0
YBL003C;YDR225W	Uninduced	1.20152	31967	YFPwt_YFPm3	0
YBL017C	Uninduced	0.982898	31967	YFPwt_YFPm3	0
YBL017C;YIL173W;YJL222W;YNR065C	Uninduced	1.02216	31967	YFPwt_YFPm3	0
YBL022C	Uninduced	0.792456	31967	YFPwt_YFPm3	0
YBL024W	Uninduced	1.975	31967	YFPwt_YFPm3	0
YBL024W	Uninduced	0.936944	31967	YFPwt_YFPm3	0
YBL024W	Uninduced	0.624493	31967	YFPwt_YFPm3	0
YBL024W	Uninduced	0.605473	31967	YFPwt_YFPm3	0
YBL026W	Uninduced	0.80457	31967	YFPwt_YFPm3	0
YBL027W;YBR084C-A	Uninduced	1.10072	31967	YFPwt_YFPm3	0
YBL027W;YBR084C-A	Uninduced	1.06256	31967	YFPwt_YFPm3	0
YBL027W;YBR084C-A	Uninduced	0.971912	31967	YFPwt_YFPm3	0
YBL027W;YBR084C-A	Uninduced	0.900009	31967	YFPwt_YFPm3	0
YBL027W;YBR084C-A	Uninduced	0.878194	31967	YFPwt_YFPm3	0
YBL027W;YBR084C-A	Uninduced	0.868357	31967	YFPwt_YFPm3	0
YBL027W;YBR084C-A	Uninduced	0.824606	31967	YFPwt_YFPm3	0
YBL027W;YBR084C-A	Uninduced	0.74195	31967	YFPwt_YFPm3	0
YBL030C	Uninduced	1.19451	31967	YFPwt_YFPm3	0
YBL030C	Uninduced	0.992457	31967	YFPwt_YFPm3	0
YBL030C	Uninduced	0.987264	31967	YFPwt_YFPm3	0
YBL030C	Uninduced	0.967305	31967	YFPwt_YFPm3	0
YBL030C	Uninduced	0.966931	31967	YFPwt_YFPm3	0
YBL030C	Uninduced	0.963391	31967	YFPwt_YFPm3	0
YBL030C	Uninduced	0.894614	31967	YFPwt_YFPm3	0
YBL030C	Uninduced	0.888889	31967	YFPwt_YFPm3	0
YBL034C	Uninduced	1.0701	31967	YFPwt_YFPm3	0
YBL036C	Uninduced	1.2206	31967	YFPwt_YFPm3	0
YBL039C	Uninduced	1.22299	31967	YFPwt_YFPm3	0
YBL039C	Uninduced	1.13855	31967	YFPwt_YFPm3	0
YBL039C	Uninduced	1.08078	31967	YFPwt_YFPm3	0
YBL039C	Uninduced	0.975324	31967	YFPwt_YFPm3	0
YBL039C	Uninduced	0.593296	31967	YFPwt_YFPm3	0
YBL045C	Uninduced	0.965158	31967	YFPwt_YFPm3	0
YBL047C	Uninduced	1.17791	31967	YFPwt_YFPm3	0
YBL047C	Uninduced	0.998502	31967	YFPwt_YFPm3	0
YBL047C	Uninduced	0.937647	31967	YFPwt_YFPm3	0
YBL047C	Uninduced	0.925326	31967	YFPwt_YFPm3	0
YBL047C	Uninduced	0.843455	31967	YFPwt_YFPm3	0
YBL050W	Uninduced	0.961261	31967	YFPwt_YFPm3	0
YBL050W	Uninduced	0.909753	31967	YFPwt_YFPm3	0
YBL050W	Uninduced	0.887784	31967	YFPwt_YFPm3	0
YBL050W	Uninduced	0.810307	31967	YFPwt_YFPm3	0
YBL050W	Uninduced	0.802504	31967	YFPwt_YFPm3	0
YBL051C	Uninduced	0.554293	31967	YFPwt_YFPm3	0
YBL055C	Uninduced	8.16727	31967	YFPwt_YFPm3	0
YBL058W	Uninduced	0.91391	31967	YFPwt_YFPm3	0
YBL064C	Uninduced	0.78765	31967	YFPwt_YFPm3	0
YBL072C;YER102W	Uninduced	0.992851	31967	YFPwt_YFPm3	0
YBL072C;YER102W	Uninduced	0.954472	31967	YFPwt_YFPm3	0
YBL072C;YER102W	Uninduced	0.936242	31967	YFPwt_YFPm3	0
YBL072C;YER102W	Uninduced	0.924984	31967	YFPwt_YFPm3	0
YBL072C;YER102W	Uninduced	0.903098	31967	YFPwt_YFPm3	0
YBL076C	Uninduced	1.58423	31967	YFPwt_YFPm3	0
YBL076C	Uninduced	1.46188	31967	YFPwt_YFPm3	0
YBL076C	Uninduced	1.27561	31967	YFPwt_YFPm3	0
YBL076C	Uninduced	1.26638	31967	YFPwt_YFPm3	0
YBL076C	Uninduced	1.16773	31967	YFPwt_YFPm3	0
YBL076C	Uninduced	1.03975	31967	YFPwt_YFPm3	0
YBL076C	Uninduced	1.03488	31967	YFPwt_YFPm3	0
YBL076C	Uninduced	1.0298	31967	YFPwt_YFPm3	0
YBL076C	Uninduced	1.02089	31967	YFPwt_YFPm3	0
YBL076C	Uninduced	1.01238	31967	YFPwt_YFPm3	0
YBL076C	Uninduced	1.00531	31967	YFPwt_YFPm3	0
YBL076C	Uninduced	0.97078	31967	YFPwt_YFPm3	0
YBL076C	Uninduced	0.963948	31967	YFPwt_YFPm3	0
YBL076C	Uninduced	0.959417	31967	YFPwt_YFPm3	0
YBL076C	Uninduced	0.945537	31967	YFPwt_YFPm3	0
YBL076C	Uninduced	0.885034	31967	YFPwt_YFPm3	0
YBL076C	Uninduced	0.833056	31967	YFPwt_YFPm3	0
YBL076C	Uninduced	0.811622	31967	YFPwt_YFPm3	0
YBL076C	Uninduced	0.558254	31967	YFPwt_YFPm3	0
YBL079W	Uninduced	0.956389	31967	YFPwt_YFPm3	0
YBL087C;YER117W	Uninduced	1.28581	31967	YFPwt_YFPm3	0
YBL087C;YER117W	Uninduced	1.18454	31967	YFPwt_YFPm3	0
YBL087C;YER117W	Uninduced	1.11257	31967	YFPwt_YFPm3	0
YBL087C;YER117W	Uninduced	0.968711	31967	YFPwt_YFPm3	0
YBL087C;YER117W	Uninduced	0.968335	31967	YFPwt_YFPm3	0
YBL092W	Uninduced	1.12	31967	YFPwt_YFPm3	0
YBL092W	Uninduced	1.0716	31967	YFPwt_YFPm3	0
YBL092W	Uninduced	0.987557	31967	YFPwt_YFPm3	0
YBL092W	Uninduced	0.944376	31967	YFPwt_YFPm3	0
YBL092W	Uninduced	0.894374	31967	YFPwt_YFPm3	0
YBL092W	Uninduced	0.871992	31967	YFPwt_YFPm3	0
YBL099W	Uninduced	10.127	31967	YFPwt_YFPm3	0
YBL099W	Uninduced	1.47883	31967	YFPwt_YFPm3	0
YBL099W	Uninduced	1.21582	31967	YFPwt_YFPm3	0
YBL099W	Uninduced	1.00621	31967	YFPwt_YFPm3	0
YBL099W	Uninduced	0.981065	31967	YFPwt_YFPm3	0
YBL099W	Uninduced	0.966837	31967	YFPwt_YFPm3	0
YBL099W	Uninduced	0.957029	31967	YFPwt_YFPm3	0
YBL099W	Uninduced	0.950119	31967	YFPwt_YFPm3	0
YBL099W	Uninduced	0.93668	31967	YFPwt_YFPm3	0
YBL099W	Uninduced	0.926526	31967	YFPwt_YFPm3	0
YBL099W	Uninduced	0.905633	31967	YFPwt_YFPm3	0
YBL099W	Uninduced	0.727061	31967	YFPwt_YFPm3	0
YBR009C;YNL030W	Uninduced	1.02681	31967	YFPwt_YFPm3	0
YBR011C	Uninduced	1.11058	31967	YFPwt_YFPm3	0
YBR011C	Uninduced	1.06399	31967	YFPwt_YFPm3	0
YBR011C	Uninduced	0.975229	31967	YFPwt_YFPm3	0
YBR011C	Uninduced	0.971723	31967	YFPwt_YFPm3	0
YBR011C	Uninduced	0.966837	31967	YFPwt_YFPm3	0
YBR011C	Uninduced	0.963206	31967	YFPwt_YFPm3	0
YBR011C	Uninduced	0.952744	31967	YFPwt_YFPm3	0
YBR011C	Uninduced	0.893975	31967	YFPwt_YFPm3	0
YBR014C	Uninduced	1.17253	31967	YFPwt_YFPm3	0
YBR015C	Uninduced	2.12364	31967	YFPwt_YFPm3	0
YBR017C	Uninduced	0.83956	31967	YFPwt_YFPm3	0
YBR025C	Uninduced	1.0101	31967	YFPwt_YFPm3	0
YBR025C	Uninduced	0.9995	31967	YFPwt_YFPm3	0
YBR025C	Uninduced	0.971251	31967	YFPwt_YFPm3	0
YBR025C	Uninduced	0.941354	31967	YFPwt_YFPm3	0
YBR025C	Uninduced	0.880049	31967	YFPwt_YFPm3	0
YBR026C	Uninduced	1.11493	31967	YFPwt_YFPm3	0
YBR029C	Uninduced	1.39318	31967	YFPwt_YFPm3	0
YBR031W;YDR012W	Uninduced	1.22205	31967	YFPwt_YFPm3	0
YBR031W;YDR012W	Uninduced	1.12075	31967	YFPwt_YFPm3	0
YBR031W;YDR012W	Uninduced	1.11878	31967	YFPwt_YFPm3	0
YBR031W;YDR012W	Uninduced	1.07096	31967	YFPwt_YFPm3	0
YBR031W;YDR012W	Uninduced	0.905469	31967	YFPwt_YFPm3	0
YBR034C	Uninduced	0.814332	31967	YFPwt_YFPm3	0
YBR039W	Uninduced	2.70292	31967	YFPwt_YFPm3	0
YBR039W	Uninduced	1.06226	31967	YFPwt_YFPm3	0
YBR039W	Uninduced	1.05916	31967	YFPwt_YFPm3	0
YBR039W	Uninduced	1.05258	31967	YFPwt_YFPm3	0
YBR039W	Uninduced	1.04875	31967	YFPwt_YFPm3	0
YBR039W	Uninduced	0.935629	31967	YFPwt_YFPm3	0
YBR039W	Uninduced	0.912159	31967	YFPwt_YFPm3	0
YBR048W;YDR025W	Uninduced	1.51037	31967	YFPwt_YFPm3	0
YBR048W;YDR025W	Uninduced	1.1517	31967	YFPwt_YFPm3	0
YBR048W;YDR025W	Uninduced	0.969838	31967	YFPwt_YFPm3	0
YBR048W;YDR025W	Uninduced	0.963298	31967	YFPwt_YFPm3	0
YBR048W;YDR025W	Uninduced	0.948947	31967	YFPwt_YFPm3	0
YBR052C	Uninduced	1.05039	31967	YFPwt_YFPm3	0
YBR052C	Uninduced	0.803084	31967	YFPwt_YFPm3	0
YBR058C	Uninduced	1.58841	31967	YFPwt_YFPm3	0
YBR078W	Uninduced	1.22551	31967	YFPwt_YFPm3	0
YBR078W	Uninduced	0.976753	31967	YFPwt_YFPm3	0
YBR079C	Uninduced	1.76109	31967	YFPwt_YFPm3	0
YBR079C	Uninduced	1.60228	31967	YFPwt_YFPm3	0
YBR079C	Uninduced	1.50229	31967	YFPwt_YFPm3	0
YBR079C	Uninduced	1.34261	31967	YFPwt_YFPm3	0
YBR079C	Uninduced	1.22868	31967	YFPwt_YFPm3	0
YBR079C	Uninduced	1.19457	31967	YFPwt_YFPm3	0
YBR079C	Uninduced	1.16011	31967	YFPwt_YFPm3	0
YBR079C	Uninduced	1.09207	31967	YFPwt_YFPm3	0
YBR079C	Uninduced	1.02126	31967	YFPwt_YFPm3	0
YBR079C	Uninduced	1.021	31967	YFPwt_YFPm3	0
YBR079C	Uninduced	0.945269	31967	YFPwt_YFPm3	0
YBR079C	Uninduced	0.923702	31967	YFPwt_YFPm3	0
YBR079C	Uninduced	0.891424	31967	YFPwt_YFPm3	0
YBR079C	Uninduced	0.681245	31967	YFPwt_YFPm3	0
YBR082C	Uninduced	0.859919	31967	YFPwt_YFPm3	0
YBR084W	Uninduced	1.23365	31967	YFPwt_YFPm3	0
YBR084W	Uninduced	1.13937	31967	YFPwt_YFPm3	0
YBR084W	Uninduced	1.09554	31967	YFPwt_YFPm3	0
YBR084W	Uninduced	0.942685	31967	YFPwt_YFPm3	0
YBR084W	Uninduced	0.862069	31967	YFPwt_YFPm3	0
YBR084W	Uninduced	0.492174	31967	YFPwt_YFPm3	0
YBR084W	Uninduced	0.428927	31967	YFPwt_YFPm3	0
YBR084W	Uninduced	0.267616	31967	YFPwt_YFPm3	0
YBR085W	Uninduced	1.3285	31967	YFPwt_YFPm3	0
YBR088C	Uninduced	1.20878	31967	YFPwt_YFPm3	0
YBR088C	Uninduced	0.95429	31967	YFPwt_YFPm3	0
YBR088C	Uninduced	0.892061	31967	YFPwt_YFPm3	0
YBR092C;YBR093C	Uninduced	0.730887	31967	YFPwt_YFPm3	0
YBR092C;YBR093C;YAR071W;YHR215W	Uninduced	0.80186	31967	YFPwt_YFPm3	0
YBR106W	Uninduced	1.36793	31967	YFPwt_YFPm3	0
YBR106W	Uninduced	1.32321	31967	YFPwt_YFPm3	0
YBR106W	Uninduced	1.0352	31967	YFPwt_YFPm3	0
YBR109C	Uninduced	1.1748	31967	YFPwt_YFPm3	0
YBR109C	Uninduced	1.01362	31967	YFPwt_YFPm3	0
YBR109C	Uninduced	0.973425	31967	YFPwt_YFPm3	0
YBR112C	Uninduced	0.913576	31967	YFPwt_YFPm3	0
YBR118W;YPR080W	Uninduced	1.21067	31967	YFPwt_YFPm3	0
YBR118W;YPR080W	Uninduced	1.17628	31967	YFPwt_YFPm3	0
YBR118W;YPR080W	Uninduced	1.17041	31967	YFPwt_YFPm3	0
YBR118W;YPR080W	Uninduced	1.08797	31967	YFPwt_YFPm3	0
YBR118W;YPR080W	Uninduced	1.08638	31967	YFPwt_YFPm3	0
YBR118W;YPR080W	Uninduced	1.08332	31967	YFPwt_YFPm3	0
YBR118W;YPR080W	Uninduced	1.07182	31967	YFPwt_YFPm3	0
YBR118W;YPR080W	Uninduced	1.06742	31967	YFPwt_YFPm3	0
YBR118W;YPR080W	Uninduced	1.03616	31967	YFPwt_YFPm3	0
YBR118W;YPR080W	Uninduced	1.02117	31967	YFPwt_YFPm3	0
YBR118W;YPR080W	Uninduced	1.00885	31967	YFPwt_YFPm3	0
YBR118W;YPR080W	Uninduced	1.00793	31967	YFPwt_YFPm3	0
YBR118W;YPR080W	Uninduced	0.997009	31967	YFPwt_YFPm3	0
YBR118W;YPR080W	Uninduced	0.948227	31967	YFPwt_YFPm3	0
YBR118W;YPR080W	Uninduced	0.886682	31967	YFPwt_YFPm3	0
YBR118W;YPR080W	Uninduced	0.878117	31967	YFPwt_YFPm3	0
YBR118W;YPR080W	Uninduced	0.719476	31967	YFPwt_YFPm3	0
YBR121C	Uninduced	2.60654	31967	YFPwt_YFPm3	0
YBR121C	Uninduced	1.31721	31967	YFPwt_YFPm3	0
YBR121C	Uninduced	1.27299	31967	YFPwt_YFPm3	0
YBR121C	Uninduced	1.18735	31967	YFPwt_YFPm3	0
YBR121C	Uninduced	1.11737	31967	YFPwt_YFPm3	0
YBR121C	Uninduced	1.08264	31967	YFPwt_YFPm3	0
YBR121C	Uninduced	1.0576	31967	YFPwt_YFPm3	0
YBR121C	Uninduced	1.03585	31967	YFPwt_YFPm3	0
YBR121C	Uninduced	1.01075	31967	YFPwt_YFPm3	0
YBR121C	Uninduced	0.997208	31967	YFPwt_YFPm3	0
YBR121C	Uninduced	0.952925	31967	YFPwt_YFPm3	0
YBR121C	Uninduced	0.94697	31967	YFPwt_YFPm3	0
YBR121C	Uninduced	0.941797	31967	YFPwt_YFPm3	0
YBR121C	Uninduced	0.935191	31967	YFPwt_YFPm3	0
YBR121C	Uninduced	0.881912	31967	YFPwt_YFPm3	0
YBR126C	Uninduced	0.949487	31967	YFPwt_YFPm3	0
YBR126C	Uninduced	0.941265	31967	YFPwt_YFPm3	0
YBR127C	Uninduced	1.15942	31967	YFPwt_YFPm3	0
YBR127C	Uninduced	1.13839	31967	YFPwt_YFPm3	0
YBR127C	Uninduced	1.10952	31967	YFPwt_YFPm3	0
YBR127C	Uninduced	1.09445	31967	YFPwt_YFPm3	0
YBR127C	Uninduced	1.05186	31967	YFPwt_YFPm3	0
YBR127C	Uninduced	0.876424	31967	YFPwt_YFPm3	0
YBR127C	Uninduced	0.862589	31967	YFPwt_YFPm3	0
YBR143C	Uninduced	3.39202	31967	YFPwt_YFPm3	0
YBR143C	Uninduced	1.54911	31967	YFPwt_YFPm3	0
YBR143C	Uninduced	1.17115	31967	YFPwt_YFPm3	0
YBR143C	Uninduced	1.0589	31967	YFPwt_YFPm3	0
YBR143C	Uninduced	1.05321	31967	YFPwt_YFPm3	0
YBR143C	Uninduced	0.896138	31967	YFPwt_YFPm3	0
YBR143C	Uninduced	0.887154	31967	YFPwt_YFPm3	0
YBR143C	Uninduced	0.777847	31967	YFPwt_YFPm3	0
YBR149W	Uninduced	1.04075	31967	YFPwt_YFPm3	0
YBR149W	Uninduced	0.928678	31967	YFPwt_YFPm3	0
YBR149W	Uninduced	0.853242	31967	YFPwt_YFPm3	0
YBR154C	Uninduced	0.925497	31967	YFPwt_YFPm3	0
YBR154C	Uninduced	0.918358	31967	YFPwt_YFPm3	0
YBR155W	Uninduced	0.946163	31967	YFPwt_YFPm3	0
YBR159W	Uninduced	0.883158	31967	YFPwt_YFPm3	0
YBR159W	Uninduced	0.695507	31967	YFPwt_YFPm3	0
YBR164C	Uninduced	0.913492	31967	YFPwt_YFPm3	0
YBR169C	Uninduced	0.951475	31967	YFPwt_YFPm3	0
YBR171W	Uninduced	0.911577	31967	YFPwt_YFPm3	0
YBR177C	Uninduced	1.29024	31967	YFPwt_YFPm3	0
YBR177C	Uninduced	1.14457	31967	YFPwt_YFPm3	0
YBR177C	Uninduced	1.13825	31967	YFPwt_YFPm3	0
YBR177C	Uninduced	0.987947	31967	YFPwt_YFPm3	0
YBR181C;YPL090C	Uninduced	1.38739	31967	YFPwt_YFPm3	0
YBR181C;YPL090C	Uninduced	1.1332	31967	YFPwt_YFPm3	0
YBR181C;YPL090C	Uninduced	1.10789	31967	YFPwt_YFPm3	0
YBR181C;YPL090C	Uninduced	1.04132	31967	YFPwt_YFPm3	0
YBR181C;YPL090C	Uninduced	1.00376	31967	YFPwt_YFPm3	0
YBR181C;YPL090C	Uninduced	0.996214	31967	YFPwt_YFPm3	0
YBR181C;YPL090C	Uninduced	0.99552	31967	YFPwt_YFPm3	0
YBR181C;YPL090C	Uninduced	0.984252	31967	YFPwt_YFPm3	0
YBR181C;YPL090C	Uninduced	0.955566	31967	YFPwt_YFPm3	0
YBR189W;YPL081W	Uninduced	1.07873	31967	YFPwt_YFPm3	0
YBR189W;YPL081W	Uninduced	1.00599	31967	YFPwt_YFPm3	0
YBR189W;YPL081W	Uninduced	0.992851	31967	YFPwt_YFPm3	0
YBR189W;YPL081W	Uninduced	0.985222	31967	YFPwt_YFPm3	0
YBR189W;YPL081W	Uninduced	0.972857	31967	YFPwt_YFPm3	0
YBR189W;YPL081W	Uninduced	0.914077	31967	YFPwt_YFPm3	0
YBR189W;YPL081W	Uninduced	0.812744	31967	YFPwt_YFPm3	0
YBR191W	Uninduced	1.08601	31967	YFPwt_YFPm3	0
YBR191W;YPL079W	Uninduced	1.15018	31967	YFPwt_YFPm3	0
YBR191W;YPL079W	Uninduced	1.10316	31967	YFPwt_YFPm3	0
YBR191W;YPL079W	Uninduced	0.9996	31967	YFPwt_YFPm3	0
YBR191W;YPL079W	Uninduced	0.993443	31967	YFPwt_YFPm3	0
YBR191W;YPL079W	Uninduced	0.986096	31967	YFPwt_YFPm3	0
YBR191W;YPL079W	Uninduced	0.982704	31967	YFPwt_YFPm3	0
YBR196C	Uninduced	1.66152	31967	YFPwt_YFPm3	0
YBR196C	Uninduced	1.0726	31967	YFPwt_YFPm3	0
YBR196C	Uninduced	1.05419	31967	YFPwt_YFPm3	0
YBR196C	Uninduced	1.04768	31967	YFPwt_YFPm3	0
YBR196C	Uninduced	1.04414	31967	YFPwt_YFPm3	0
YBR196C	Uninduced	1.04094	31967	YFPwt_YFPm3	0
YBR196C	Uninduced	1.03141	31967	YFPwt_YFPm3	0
YBR196C	Uninduced	1.0291	31967	YFPwt_YFPm3	0
YBR196C	Uninduced	1.02184	31967	YFPwt_YFPm3	0
YBR196C	Uninduced	1.02131	31967	YFPwt_YFPm3	0
YBR196C	Uninduced	1.00865	31967	YFPwt_YFPm3	0
YBR196C	Uninduced	1.00452	31967	YFPwt_YFPm3	0
YBR196C	Uninduced	0.968617	31967	YFPwt_YFPm3	0
YBR196C	Uninduced	0.962742	31967	YFPwt_YFPm3	0
YBR196C	Uninduced	0.94518	31967	YFPwt_YFPm3	0
YBR196C	Uninduced	0.941354	31967	YFPwt_YFPm3	0
YBR196C	Uninduced	0.602228	31967	YFPwt_YFPm3	0
YBR196C	Uninduced	0.557631	31967	YFPwt_YFPm3	0
YBR200W	Uninduced	1.126	31967	YFPwt_YFPm3	0
YBR201W	Uninduced	1.03818	31967	YFPwt_YFPm3	0
YBR204C	Uninduced	1.79353	31967	YFPwt_YFPm3	0
YBR218C	Uninduced	1.13089	31967	YFPwt_YFPm3	0
YBR218C	Uninduced	1.08916	31967	YFPwt_YFPm3	0
YBR218C;YGL062W	Uninduced	1.30005	31967	YFPwt_YFPm3	0
YBR218C;YGL062W	Uninduced	1.04491	31967	YFPwt_YFPm3	0
YBR218C;YGL062W	Uninduced	1.03834	31967	YFPwt_YFPm3	0
YBR218C;YGL062W	Uninduced	1.02597	31967	YFPwt_YFPm3	0
YBR218C;YGL062W	Uninduced	1.01111	31967	YFPwt_YFPm3	0
YBR218C;YGL062W	Uninduced	0.982704	31967	YFPwt_YFPm3	0
YBR218C;YGL062W	Uninduced	0.890948	31967	YFPwt_YFPm3	0
YBR218C;YGL062W	Uninduced	0.753409	31967	YFPwt_YFPm3	0
YBR221C	Uninduced	0.938174	31967	YFPwt_YFPm3	0
YBR236C	Uninduced	1.25821	31967	YFPwt_YFPm3	0
YBR244W;YIR037W	Uninduced	0.933445	31967	YFPwt_YFPm3	0
YBR244W;YIR037W	Uninduced	0.880747	31967	YFPwt_YFPm3	0
YBR245C	Uninduced	1.0392	31967	YFPwt_YFPm3	0
YBR245C	Uninduced	0.746547	31967	YFPwt_YFPm3	0
YBR247C	Uninduced	1.59063	31967	YFPwt_YFPm3	0
YBR248C	Uninduced	0.995223	31967	YFPwt_YFPm3	0
YBR248C	Uninduced	0.809192	31967	YFPwt_YFPm3	0
YBR249C	Uninduced	1.11744	31967	YFPwt_YFPm3	0
YBR249C	Uninduced	0.851789	31967	YFPwt_YFPm3	0
YBR249C	Uninduced	0.825832	31967	YFPwt_YFPm3	0
YBR251W	Uninduced	0.957304	31967	YFPwt_YFPm3	0
YBR252W	Uninduced	1.3083	31967	YFPwt_YFPm3	0
YBR252W	Uninduced	0.926698	31967	YFPwt_YFPm3	0
YBR252W	Uninduced	0.855725	31967	YFPwt_YFPm3	0
YBR263W	Uninduced	1.75174	31967	YFPwt_YFPm3	0
YBR263W	Uninduced	1.52987	31967	YFPwt_YFPm3	0
YBR263W	Uninduced	1.50288	31967	YFPwt_YFPm3	0
YBR263W	Uninduced	1.09413	31967	YFPwt_YFPm3	0
YBR263W	Uninduced	1.01684	31967	YFPwt_YFPm3	0
YBR275C	Uninduced	0.879275	31967	YFPwt_YFPm3	0
YBR283C	Uninduced	1.0117	31967	YFPwt_YFPm3	0
YBR286W	Uninduced	1.81812	31967	YFPwt_YFPm3	0
YBR286W	Uninduced	1.28876	31967	YFPwt_YFPm3	0
YBR286W	Uninduced	0.943663	31967	YFPwt_YFPm3	0
YCL011C	Uninduced	0.882768	31967	YFPwt_YFPm3	0
YCL014W	Uninduced	1.18975	31967	YFPwt_YFPm3	0
YCL017C	Uninduced	0.416545	31967	YFPwt_YFPm3	0
YCL019W;YDR210W-B;YFL002W-A;YGR161W-B;YLR410W-B;YOR192C-B;YOR343W-B	Uninduced	1.96205	31967	YFPwt_YFPm3	0
YCL026C-B	Uninduced	1.29356	31967	YFPwt_YFPm3	0
YCL028W	Uninduced	1.00669	31967	YFPwt_YFPm3	0
YCL030C	Uninduced	1.67328	31967	YFPwt_YFPm3	0
YCL030C	Uninduced	1.54926	31967	YFPwt_YFPm3	0
YCL030C	Uninduced	0.897908	31967	YFPwt_YFPm3	0
YCL037C	Uninduced	1.16421	31967	YFPwt_YFPm3	0
YCL037C	Uninduced	1.00471	31967	YFPwt_YFPm3	0
YCL037C	Uninduced	0.988045	31967	YFPwt_YFPm3	0
YCL037C	Uninduced	0.864902	31967	YFPwt_YFPm3	0
YCL040W	Uninduced	1.16565	31967	YFPwt_YFPm3	0
YCL040W	Uninduced	1.02443	31967	YFPwt_YFPm3	0
YCL040W	Uninduced	1.01449	31967	YFPwt_YFPm3	0
YCL043C	Uninduced	1.24917	31967	YFPwt_YFPm3	0
YCL043C	Uninduced	1.10719	31967	YFPwt_YFPm3	0
YCL043C	Uninduced	1.06592	31967	YFPwt_YFPm3	0
YCL043C	Uninduced	0.990688	31967	YFPwt_YFPm3	0
YCL043C	Uninduced	0.960154	31967	YFPwt_YFPm3	0
YCL043C	Uninduced	0.935191	31967	YFPwt_YFPm3	0
YCL043C	Uninduced	0.880437	31967	YFPwt_YFPm3	0
YCL043C	Uninduced	0.770713	31967	YFPwt_YFPm3	0
YCL043C	Uninduced	0.703631	31967	YFPwt_YFPm3	0
YCL050C	Uninduced	1.20956	31967	YFPwt_YFPm3	0
YCL050C	Uninduced	1.01739	31967	YFPwt_YFPm3	0
YCL050C	Uninduced	0.930319	31967	YFPwt_YFPm3	0
YCL050C	Uninduced	0.880669	31967	YFPwt_YFPm3	0
YCL050C	Uninduced	0.799936	31967	YFPwt_YFPm3	0
YCL057W	Uninduced	0.960799	31967	YFPwt_YFPm3	0
YCL057W	Uninduced	0.896459	31967	YFPwt_YFPm3	0
YCR004C	Uninduced	0.846095	31967	YFPwt_YFPm3	0
YCR008W	Uninduced	0.981643	31967	YFPwt_YFPm3	0
YCR012W	Uninduced	3.3279	31967	YFPwt_YFPm3	0
YCR012W	Uninduced	1.41955	31967	YFPwt_YFPm3	0
YCR012W	Uninduced	1.40093	31967	YFPwt_YFPm3	0
YCR012W	Uninduced	1.24366	31967	YFPwt_YFPm3	0
YCR012W	Uninduced	1.17312	31967	YFPwt_YFPm3	0
YCR012W	Uninduced	1.1645	31967	YFPwt_YFPm3	0
YCR012W	Uninduced	1.15845	31967	YFPwt_YFPm3	0
YCR012W	Uninduced	1.12817	31967	YFPwt_YFPm3	0
YCR012W	Uninduced	1.1077	31967	YFPwt_YFPm3	0
YCR012W	Uninduced	1.08314	31967	YFPwt_YFPm3	0
YCR012W	Uninduced	1.04883	31967	YFPwt_YFPm3	0
YCR012W	Uninduced	1.04827	31967	YFPwt_YFPm3	0
YCR012W	Uninduced	1.04427	31967	YFPwt_YFPm3	0
YCR012W	Uninduced	1.04396	31967	YFPwt_YFPm3	0
YCR012W	Uninduced	1.04245	31967	YFPwt_YFPm3	0
YCR012W	Uninduced	1.02806	31967	YFPwt_YFPm3	0
YCR012W	Uninduced	1.02106	31967	YFPwt_YFPm3	0
YCR012W	Uninduced	1.01992	31967	YFPwt_YFPm3	0
YCR012W	Uninduced	1.00788	31967	YFPwt_YFPm3	0
YCR012W	Uninduced	1.00221	31967	YFPwt_YFPm3	0
YCR012W	Uninduced	1.00084	31967	YFPwt_YFPm3	0
YCR012W	Uninduced	0.991768	31967	YFPwt_YFPm3	0
YCR012W	Uninduced	0.984446	31967	YFPwt_YFPm3	0
YCR012W	Uninduced	0.968335	31967	YFPwt_YFPm3	0
YCR012W	Uninduced	0.957121	31967	YFPwt_YFPm3	0
YCR012W	Uninduced	0.92773	31967	YFPwt_YFPm3	0
YCR012W	Uninduced	0.915751	31967	YFPwt_YFPm3	0
YCR012W	Uninduced	0.840689	31967	YFPwt_YFPm3	0
YCR032W	Uninduced	1.0863	31967	YFPwt_YFPm3	0
YCR034W	Uninduced	0.78064	31967	YFPwt_YFPm3	0
YCR051W	Uninduced	0.739973	31967	YFPwt_YFPm3	0
YCR053W	Uninduced	1.95385	31967	YFPwt_YFPm3	0
YCR053W	Uninduced	1.59775	31967	YFPwt_YFPm3	0
YCR053W	Uninduced	1.2402	31967	YFPwt_YFPm3	0
YCR053W	Uninduced	1.10067	31967	YFPwt_YFPm3	0
YCR053W	Uninduced	1.09036	31967	YFPwt_YFPm3	0
YCR053W	Uninduced	1.02724	31967	YFPwt_YFPm3	0
YCR053W	Uninduced	1.00631	31967	YFPwt_YFPm3	0
YCR053W	Uninduced	1.00176	31967	YFPwt_YFPm3	0
YCR053W	Uninduced	0.995818	31967	YFPwt_YFPm3	0
YCR053W	Uninduced	0.964692	31967	YFPwt_YFPm3	0
YCR053W	Uninduced	0.942951	31967	YFPwt_YFPm3	0
YCR053W	Uninduced	0.844096	31967	YFPwt_YFPm3	0
YCR053W	Uninduced	0.810767	31967	YFPwt_YFPm3	0
YCR053W	Uninduced	0.776759	31967	YFPwt_YFPm3	0
YCR057C	Uninduced	1.06692	31967	YFPwt_YFPm3	0
YCR057C	Uninduced	0.973331	31967	YFPwt_YFPm3	0
YCR083W	Uninduced	1.44088	31967	YFPwt_YFPm3	0
YCR083W	Uninduced	1.27923	31967	YFPwt_YFPm3	0
YCR084C	Uninduced	1.00483	31967	YFPwt_YFPm3	0
YCR084C	Uninduced	0.551177	31967	YFPwt_YFPm3	0
YCR088W	Uninduced	1.04122	31967	YFPwt_YFPm3	0
YCR088W	Uninduced	0.81646	31967	YFPwt_YFPm3	0
YDL004W	Uninduced	0.982125	31967	YFPwt_YFPm3	0
YDL004W	Uninduced	0.928936	31967	YFPwt_YFPm3	0
YDL005C	Uninduced	1.09352	31967	YFPwt_YFPm3	0
YDL007W	Uninduced	0.498231	31967	YFPwt_YFPm3	0
YDL014W	Uninduced	1.62406	31967	YFPwt_YFPm3	0
YDL014W	Uninduced	0.985222	31967	YFPwt_YFPm3	0
YDL014W	Uninduced	0.954563	31967	YFPwt_YFPm3	0
YDL014W	Uninduced	0.869641	31967	YFPwt_YFPm3	0
YDL014W	Uninduced	0.802439	31967	YFPwt_YFPm3	0
YDL014W	Uninduced	0.600132	31967	YFPwt_YFPm3	0
YDL015C	Uninduced	1.1687	31967	YFPwt_YFPm3	0
YDL022W	Uninduced	0.929887	31967	YFPwt_YFPm3	0
YDL022W	Uninduced	0.838223	31967	YFPwt_YFPm3	0
YDL029W	Uninduced	0.563158	31967	YFPwt_YFPm3	0
YDL031W	Uninduced	0.0939055	31967	YFPwt_YFPm3	0
YDL040C	Uninduced	1.72843	31967	YFPwt_YFPm3	0
YDL040C	Uninduced	0.92098	31967	YFPwt_YFPm3	0
YDL040C	Uninduced	0.821423	31967	YFPwt_YFPm3	0
YDL051W	Uninduced	0.814133	31967	YFPwt_YFPm3	0
YDL053C	Uninduced	0.904732	31967	YFPwt_YFPm3	0
YDL053C	Uninduced	0.732011	31967	YFPwt_YFPm3	0
YDL055C	Uninduced	1.68905	31967	YFPwt_YFPm3	0
YDL055C	Uninduced	1.3727	31967	YFPwt_YFPm3	0
YDL055C	Uninduced	1.28431	31967	YFPwt_YFPm3	0
YDL055C	Uninduced	1.20256	31967	YFPwt_YFPm3	0
YDL055C	Uninduced	1.16187	31967	YFPwt_YFPm3	0
YDL055C	Uninduced	1.05071	31967	YFPwt_YFPm3	0
YDL055C	Uninduced	1.0471	31967	YFPwt_YFPm3	0
YDL055C	Uninduced	1.0359	31967	YFPwt_YFPm3	0
YDL055C	Uninduced	0.959233	31967	YFPwt_YFPm3	0
YDL058W	Uninduced	14.8324	31967	YFPwt_YFPm3	0
YDL064W	Uninduced	0.937647	31967	YFPwt_YFPm3	0
YDL066W	Uninduced	1.49214	31967	YFPwt_YFPm3	0
YDL066W	Uninduced	1.08928	31967	YFPwt_YFPm3	0
YDL066W	Uninduced	1.07888	31967	YFPwt_YFPm3	0
YDL066W	Uninduced	1.07246	31967	YFPwt_YFPm3	0
YDL066W	Uninduced	1.00116	31967	YFPwt_YFPm3	0
YDL066W	Uninduced	0.997805	31967	YFPwt_YFPm3	0
YDL066W	Uninduced	0.950661	31967	YFPwt_YFPm3	0
YDL066W	Uninduced	0.947598	31967	YFPwt_YFPm3	0
YDL066W	Uninduced	0.853024	31967	YFPwt_YFPm3	0
YDL066W	Uninduced	0.626841	31967	YFPwt_YFPm3	0
YDL066W	Uninduced	0.112049	31967	YFPwt_YFPm3	0
YDL067C	Uninduced	1.02739	31967	YFPwt_YFPm3	0
YDL067C	Uninduced	0.62692	31967	YFPwt_YFPm3	0
YDL072C	Uninduced	0.862887	31967	YFPwt_YFPm3	0
YDL072C	Uninduced	0.851426	31967	YFPwt_YFPm3	0
YDL075W	Uninduced	1.10082	31967	YFPwt_YFPm3	0
YDL075W	Uninduced	1.05087	31967	YFPwt_YFPm3	0
YDL075W	Uninduced	1.01128	31967	YFPwt_YFPm3	0
YDL075W	Uninduced	0.993443	31967	YFPwt_YFPm3	0
YDL075W	Uninduced	0.98668	31967	YFPwt_YFPm3	0
YDL075W;YLR406C	Uninduced	1.10435	31967	YFPwt_YFPm3	0
YDL075W;YLR406C	Uninduced	1.05548	31967	YFPwt_YFPm3	0
YDL075W;YLR406C	Uninduced	1.04026	31967	YFPwt_YFPm3	0
YDL075W;YLR406C	Uninduced	0.978569	31967	YFPwt_YFPm3	0
YDL075W;YLR406C	Uninduced	0.953471	31967	YFPwt_YFPm3	0
YDL075W;YLR406C	Uninduced	0.93791	31967	YFPwt_YFPm3	0
YDL078C	Uninduced	1.00478	31967	YFPwt_YFPm3	0
YDL078C	Uninduced	0.943218	31967	YFPwt_YFPm3	0
YDL078C	Uninduced	0.877886	31967	YFPwt_YFPm3	0
YDL078C	Uninduced	0.818934	31967	YFPwt_YFPm3	0
YDL081C	Uninduced	0.975039	31967	YFPwt_YFPm3	0
YDL081C	Uninduced	0.940557	31967	YFPwt_YFPm3	0
YDL081C	Uninduced	0.915081	31967	YFPwt_YFPm3	0
YDL082W;YMR142C	Uninduced	1.50319	31967	YFPwt_YFPm3	0
YDL082W;YMR142C	Uninduced	0.845737	31967	YFPwt_YFPm3	0
YDL082W;YMR142C	Uninduced	0.516422	31967	YFPwt_YFPm3	0
YDL083C;YMR143W	Uninduced	6.63702	31967	YFPwt_YFPm3	0
YDL083C;YMR143W	Uninduced	1.0077	31967	YFPwt_YFPm3	0
YDL083C;YMR143W	Uninduced	0.979528	31967	YFPwt_YFPm3	0
YDL083C;YMR143W	Uninduced	0.962094	31967	YFPwt_YFPm3	0
YDL083C;YMR143W	Uninduced	0.895015	31967	YFPwt_YFPm3	0
YDL084W	Uninduced	1.28368	31967	YFPwt_YFPm3	0
YDL084W	Uninduced	1.1483	31967	YFPwt_YFPm3	0
YDL084W	Uninduced	0.990099	31967	YFPwt_YFPm3	0
YDL084W	Uninduced	0.901957	31967	YFPwt_YFPm3	0
YDL095W	Uninduced	1.14077	31967	YFPwt_YFPm3	0
YDL095W	Uninduced	0.956297	31967	YFPwt_YFPm3	0
YDL097C	Uninduced	1.08425	31967	YFPwt_YFPm3	0
YDL097C	Uninduced	0.984058	31967	YFPwt_YFPm3	0
YDL097C	Uninduced	0.850557	31967	YFPwt_YFPm3	0
YDL097C	Uninduced	0.795102	31967	YFPwt_YFPm3	0
YDL097C	Uninduced	0.723275	31967	YFPwt_YFPm3	0
YDL100C	Uninduced	1.34097	31967	YFPwt_YFPm3	0
YDL100C	Uninduced	1.23292	31967	YFPwt_YFPm3	0
YDL100C	Uninduced	1.1425	31967	YFPwt_YFPm3	0
YDL100C	Uninduced	1.10819	31967	YFPwt_YFPm3	0
YDL100C	Uninduced	1.08028	31967	YFPwt_YFPm3	0
YDL100C	Uninduced	1.03047	31967	YFPwt_YFPm3	0
YDL100C	Uninduced	0.98464	31967	YFPwt_YFPm3	0
YDL100C	Uninduced	0.967867	31967	YFPwt_YFPm3	0
YDL103C	Uninduced	0.809782	31967	YFPwt_YFPm3	0
YDL120W	Uninduced	1.14171	31967	YFPwt_YFPm3	0
YDL121C	Uninduced	0.981354	31967	YFPwt_YFPm3	0
YDL122W	Uninduced	0.913159	31967	YFPwt_YFPm3	0
YDL124W	Uninduced	1.3323	31967	YFPwt_YFPm3	0
YDL124W	Uninduced	1.02775	31967	YFPwt_YFPm3	0
YDL124W	Uninduced	0.930579	31967	YFPwt_YFPm3	0
YDL124W	Uninduced	0.895255	31967	YFPwt_YFPm3	0
YDL125C	Uninduced	0.915835	31967	YFPwt_YFPm3	0
YDL126C	Uninduced	1.34284	31967	YFPwt_YFPm3	0
YDL126C	Uninduced	1.29465	31967	YFPwt_YFPm3	0
YDL126C	Uninduced	1.07974	31967	YFPwt_YFPm3	0
YDL126C	Uninduced	1.01099	31967	YFPwt_YFPm3	0
YDL126C	Uninduced	0.987069	31967	YFPwt_YFPm3	0
YDL126C	Uninduced	0.930579	31967	YFPwt_YFPm3	0
YDL126C	Uninduced	0.925926	31967	YFPwt_YFPm3	0
YDL126C	Uninduced	0.910001	31967	YFPwt_YFPm3	0
YDL126C	Uninduced	0.904404	31967	YFPwt_YFPm3	0
YDL126C	Uninduced	0.895897	31967	YFPwt_YFPm3	0
YDL126C	Uninduced	0.886918	31967	YFPwt_YFPm3	0
YDL126C	Uninduced	0.841255	31967	YFPwt_YFPm3	0
YDL128W	Uninduced	1.149	31967	YFPwt_YFPm3	0
YDL130W	Uninduced	1.14607	31967	YFPwt_YFPm3	0
YDL130W	Uninduced	1.11546	31967	YFPwt_YFPm3	0
YDL130W	Uninduced	1.05674	31967	YFPwt_YFPm3	0
YDL131W	Uninduced	1.15441	31967	YFPwt_YFPm3	0
YDL131W	Uninduced	1.04454	31967	YFPwt_YFPm3	0
YDL131W;YDL182W	Uninduced	1.09482	31967	YFPwt_YFPm3	0
YDL132W	Uninduced	0.626723	31967	YFPwt_YFPm3	0
YDL135C	Uninduced	1.13635	31967	YFPwt_YFPm3	0
YDL135C	Uninduced	0.855505	31967	YFPwt_YFPm3	0
YDL136W;YDL191W	Uninduced	1.05946	31967	YFPwt_YFPm3	0
YDL136W;YDL191W	Uninduced	1.03954	31967	YFPwt_YFPm3	0
YDL136W;YDL191W	Uninduced	0.980873	31967	YFPwt_YFPm3	0
YDL137W;YDL192W	Uninduced	1.29611	31967	YFPwt_YFPm3	0
YDL140C	Uninduced	1.15336	31967	YFPwt_YFPm3	0
YDL140C	Uninduced	1.14588	31967	YFPwt_YFPm3	0
YDL140C	Uninduced	1.06968	31967	YFPwt_YFPm3	0
YDL140C	Uninduced	0.436738	31967	YFPwt_YFPm3	0
YDL143W	Uninduced	1.11749	31967	YFPwt_YFPm3	0
YDL143W	Uninduced	1.09127	31967	YFPwt_YFPm3	0
YDL143W	Uninduced	0.979624	31967	YFPwt_YFPm3	0
YDL143W	Uninduced	0.797512	31967	YFPwt_YFPm3	0
YDL145C	Uninduced	1.2799	31967	YFPwt_YFPm3	0
YDL145C	Uninduced	1.01632	31967	YFPwt_YFPm3	0
YDL145C	Uninduced	0.9999	31967	YFPwt_YFPm3	0
YDL145C	Uninduced	0.897344	31967	YFPwt_YFPm3	0
YDL145C	Uninduced	0.812084	31967	YFPwt_YFPm3	0
YDL145C	Uninduced	0.628378	31967	YFPwt_YFPm3	0
YDL147W	Uninduced	1.00672	31967	YFPwt_YFPm3	0
YDL147W	Uninduced	0.9802	31967	YFPwt_YFPm3	0
YDL148C	Uninduced	0.831324	31967	YFPwt_YFPm3	0
YDL153C	Uninduced	0.56844	31967	YFPwt_YFPm3	0
YDL160C	Uninduced	1.12115	31967	YFPwt_YFPm3	0
YDL160C	Uninduced	1.0305	31967	YFPwt_YFPm3	0
YDL168W	Uninduced	0.839842	31967	YFPwt_YFPm3	0
YDL168W	Uninduced	0.821018	31967	YFPwt_YFPm3	0
YDL168W	Uninduced	0.312647	31967	YFPwt_YFPm3	0
YDL171C	Uninduced	1.03189	31967	YFPwt_YFPm3	0
YDL171C	Uninduced	0.899442	31967	YFPwt_YFPm3	0
YDL171C	Uninduced	0.898069	31967	YFPwt_YFPm3	0
YDL171C	Uninduced	0.851136	31967	YFPwt_YFPm3	0
YDL171C	Uninduced	0.829807	31967	YFPwt_YFPm3	0
YDL171C	Uninduced	0.70932	31967	YFPwt_YFPm3	0
YDL171C	Uninduced	0.626253	31967	YFPwt_YFPm3	0
YDL178W	Uninduced	1.02637	31967	YFPwt_YFPm3	0
YDL178W	Uninduced	1.00071	31967	YFPwt_YFPm3	0
YDL185W	Uninduced	1.92315	31967	YFPwt_YFPm3	0
YDL185W	Uninduced	1.2587	31967	YFPwt_YFPm3	0
YDL185W	Uninduced	1.04572	31967	YFPwt_YFPm3	0
YDL185W	Uninduced	1.00975	31967	YFPwt_YFPm3	0
YDL185W	Uninduced	0.975324	31967	YFPwt_YFPm3	0
YDL185W	Uninduced	0.973236	31967	YFPwt_YFPm3	0
YDL185W	Uninduced	0.897908	31967	YFPwt_YFPm3	0
YDL185W	Uninduced	0.248892	31967	YFPwt_YFPm3	0
YDL195W	Uninduced	0.94697	31967	YFPwt_YFPm3	0
YDL195W	Uninduced	0.915751	31967	YFPwt_YFPm3	0
YDL195W	Uninduced	0.895095	31967	YFPwt_YFPm3	0
YDL195W	Uninduced	0.886289	31967	YFPwt_YFPm3	0
YDL195W	Uninduced	0.707364	31967	YFPwt_YFPm3	0
YDL202W	Uninduced	0.872372	31967	YFPwt_YFPm3	0
YDL205C	Uninduced	0.906043	31967	YFPwt_YFPm3	0
YDL205C	Uninduced	0.77815	31967	YFPwt_YFPm3	0
YDL208W	Uninduced	1.23541	31967	YFPwt_YFPm3	0
YDL208W	Uninduced	1.13603	31967	YFPwt_YFPm3	0
YDL208W	Uninduced	1.07456	31967	YFPwt_YFPm3	0
YDL208W	Uninduced	0.961169	31967	YFPwt_YFPm3	0
YDL213C	Uninduced	1.06355	31967	YFPwt_YFPm3	0
YDL213C	Uninduced	0.751033	31967	YFPwt_YFPm3	0
YDL219W	Uninduced	1.03656	31967	YFPwt_YFPm3	0
YDL219W	Uninduced	0.931272	31967	YFPwt_YFPm3	0
YDL219W	Uninduced	0.805218	31967	YFPwt_YFPm3	0
YDL225W	Uninduced	1.28574	31967	YFPwt_YFPm3	0
YDL226C	Uninduced	1.17607	31967	YFPwt_YFPm3	0
YDL229W;YNL209W	Uninduced	2.56279	31967	YFPwt_YFPm3	0
YDL229W;YNL209W	Uninduced	1.32732	31967	YFPwt_YFPm3	0
YDL229W;YNL209W	Uninduced	1.32498	31967	YFPwt_YFPm3	0
YDL229W;YNL209W	Uninduced	1.29002	31967	YFPwt_YFPm3	0
YDL229W;YNL209W	Uninduced	1.22258	31967	YFPwt_YFPm3	0
YDL229W;YNL209W	Uninduced	1.1971	31967	YFPwt_YFPm3	0
YDL229W;YNL209W	Uninduced	1.11693	31967	YFPwt_YFPm3	0
YDL229W;YNL209W	Uninduced	1.06959	31967	YFPwt_YFPm3	0
YDL229W;YNL209W	Uninduced	1.03855	31967	YFPwt_YFPm3	0
YDL229W;YNL209W	Uninduced	0.9997	31967	YFPwt_YFPm3	0
YDL229W;YNL209W	Uninduced	0.9994	31967	YFPwt_YFPm3	0
YDL229W;YNL209W	Uninduced	0.997108	31967	YFPwt_YFPm3	0
YDL229W;YNL209W	Uninduced	0.989218	31967	YFPwt_YFPm3	0
YDL229W;YNL209W	Uninduced	0.988728	31967	YFPwt_YFPm3	0
YDL229W;YNL209W	Uninduced	0.984446	31967	YFPwt_YFPm3	0
YDL229W;YNL209W	Uninduced	0.9758	31967	YFPwt_YFPm3	0
YDL229W;YNL209W	Uninduced	0.97078	31967	YFPwt_YFPm3	0
YDL229W;YNL209W	Uninduced	0.966184	31967	YFPwt_YFPm3	0
YDL229W;YNL209W	Uninduced	0.957579	31967	YFPwt_YFPm3	0
YDL229W;YNL209W	Uninduced	0.949307	31967	YFPwt_YFPm3	0
YDL229W;YNL209W	Uninduced	0.924129	31967	YFPwt_YFPm3	0
YDL229W;YNL209W	Uninduced	0.884643	31967	YFPwt_YFPm3	0
YDL229W;YNL209W	Uninduced	0.701361	31967	YFPwt_YFPm3	0
YDL236W	Uninduced	1.75168	31967	YFPwt_YFPm3	0
YDL236W	Uninduced	0.363742	31967	YFPwt_YFPm3	0
YDR002W	Uninduced	1.25676	31967	YFPwt_YFPm3	0
YDR002W	Uninduced	0.978761	31967	YFPwt_YFPm3	0
YDR002W	Uninduced	0.978282	31967	YFPwt_YFPm3	0
YDR002W	Uninduced	0.976849	31967	YFPwt_YFPm3	0
YDR002W	Uninduced	0.553679	31967	YFPwt_YFPm3	0
YDR009W	Uninduced	0.93301	31967	YFPwt_YFPm3	0
YDR023W	Uninduced	3.46248	31967	YFPwt_YFPm3	0
YDR023W	Uninduced	1.49383	31967	YFPwt_YFPm3	0
YDR023W	Uninduced	1.37916	31967	YFPwt_YFPm3	0
YDR023W	Uninduced	1.09969	31967	YFPwt_YFPm3	0
YDR023W	Uninduced	1.08352	31967	YFPwt_YFPm3	0
YDR023W	Uninduced	1.007	31967	YFPwt_YFPm3	0
YDR023W	Uninduced	0.994827	31967	YFPwt_YFPm3	0
YDR023W	Uninduced	0.992457	31967	YFPwt_YFPm3	0
YDR023W	Uninduced	0.983768	31967	YFPwt_YFPm3	0
YDR023W	Uninduced	0.959693	31967	YFPwt_YFPm3	0
YDR023W	Uninduced	0.876732	31967	YFPwt_YFPm3	0
YDR023W	Uninduced	0.771843	31967	YFPwt_YFPm3	0
YDR023W	Uninduced	0.574581	31967	YFPwt_YFPm3	0
YDR032C	Uninduced	0.703284	31967	YFPwt_YFPm3	0
YDR033W	Uninduced	0.971628	31967	YFPwt_YFPm3	0
YDR035W	Uninduced	1.03481	31967	YFPwt_YFPm3	0
YDR036C	Uninduced	1.01161	31967	YFPwt_YFPm3	0
YDR037W	Uninduced	1.87368	31967	YFPwt_YFPm3	0
YDR037W	Uninduced	1.44716	31967	YFPwt_YFPm3	0
YDR037W	Uninduced	1.31494	31967	YFPwt_YFPm3	0
YDR037W	Uninduced	1.22867	31967	YFPwt_YFPm3	0
YDR037W	Uninduced	1.13729	31967	YFPwt_YFPm3	0
YDR037W	Uninduced	1.0493	31967	YFPwt_YFPm3	0
YDR037W	Uninduced	0.992654	31967	YFPwt_YFPm3	0
YDR037W	Uninduced	0.976944	31967	YFPwt_YFPm3	0
YDR037W	Uninduced	0.971157	31967	YFPwt_YFPm3	0
YDR050C	Uninduced	1.13271	31967	YFPwt_YFPm3	0
YDR050C	Uninduced	1.0621	31967	YFPwt_YFPm3	0
YDR050C	Uninduced	1.05393	31967	YFPwt_YFPm3	0
YDR050C	Uninduced	1.015	31967	YFPwt_YFPm3	0
YDR050C	Uninduced	1.00132	31967	YFPwt_YFPm3	0
YDR050C	Uninduced	0.983574	31967	YFPwt_YFPm3	0
YDR050C	Uninduced	0.764994	31967	YFPwt_YFPm3	0
YDR050C	Uninduced	0.575573	31967	YFPwt_YFPm3	0
YDR064W	Uninduced	1.00057	31967	YFPwt_YFPm3	0
YDR068W	Uninduced	0.915499	31967	YFPwt_YFPm3	0
YDR068W	Uninduced	0.832986	31967	YFPwt_YFPm3	0
YDR071C	Uninduced	1.78136	31967	YFPwt_YFPm3	0
YDR071C	Uninduced	1.01039	31967	YFPwt_YFPm3	0
YDR071C	Uninduced	0.875964	31967	YFPwt_YFPm3	0
YDR081C	Uninduced	6.07128	31967	YFPwt_YFPm3	0
YDR081C	Uninduced	1.00787	31967	YFPwt_YFPm3	0
YDR081C	Uninduced	1.00331	31967	YFPwt_YFPm3	0
YDR087C	Uninduced	0.89662	31967	YFPwt_YFPm3	0
YDR091C	Uninduced	1.36482	31967	YFPwt_YFPm3	0
YDR091C	Uninduced	0.925241	31967	YFPwt_YFPm3	0
YDR091C	Uninduced	0.582547	31967	YFPwt_YFPm3	0
YDR097C	Uninduced	1.27838	31967	YFPwt_YFPm3	0
YDR098C	Uninduced	1.40097	31967	YFPwt_YFPm3	0
YDR099W	Uninduced	1.15902	31967	YFPwt_YFPm3	0
YDR099W	Uninduced	0.966557	31967	YFPwt_YFPm3	0
YDR099W;YER177W	Uninduced	1.98425	31967	YFPwt_YFPm3	0
YDR099W;YER177W	Uninduced	1.49323	31967	YFPwt_YFPm3	0
YDR099W;YER177W	Uninduced	1.31931	31967	YFPwt_YFPm3	0
YDR099W;YER177W	Uninduced	1.06537	31967	YFPwt_YFPm3	0
YDR099W;YER177W	Uninduced	1.06119	31967	YFPwt_YFPm3	0
YDR099W;YER177W	Uninduced	1.04836	31967	YFPwt_YFPm3	0
YDR099W;YER177W	Uninduced	1.04808	31967	YFPwt_YFPm3	0
YDR099W;YER177W	Uninduced	1.03531	31967	YFPwt_YFPm3	0
YDR099W;YER177W	Uninduced	1.02437	31967	YFPwt_YFPm3	0
YDR099W;YER177W	Uninduced	0.969556	31967	YFPwt_YFPm3	0
YDR099W;YER177W	Uninduced	0.949397	31967	YFPwt_YFPm3	0
YDR099W;YER177W	Uninduced	0.927042	31967	YFPwt_YFPm3	0
YDR099W;YER177W	Uninduced	0.883392	31967	YFPwt_YFPm3	0
YDR101C	Uninduced	1.15416	31967	YFPwt_YFPm3	0
YDR101C	Uninduced	0.892061	31967	YFPwt_YFPm3	0
YDR109C	Uninduced	1.43664	31967	YFPwt_YFPm3	0
YDR122W	Uninduced	1.32682	31967	YFPwt_YFPm3	0
YDR127W	Uninduced	1.43835	31967	YFPwt_YFPm3	0
YDR127W	Uninduced	1.2594	31967	YFPwt_YFPm3	0
YDR127W	Uninduced	1.14917	31967	YFPwt_YFPm3	0
YDR127W	Uninduced	1.10684	31967	YFPwt_YFPm3	0
YDR127W	Uninduced	1.01214	31967	YFPwt_YFPm3	0
YDR127W	Uninduced	0.972101	31967	YFPwt_YFPm3	0
YDR127W	Uninduced	0.894294	31967	YFPwt_YFPm3	0
YDR127W	Uninduced	0.856164	31967	YFPwt_YFPm3	0
YDR127W	Uninduced	0.853971	31967	YFPwt_YFPm3	0
YDR127W	Uninduced	0.464727	31967	YFPwt_YFPm3	0
YDR129C	Uninduced	1.43765	31967	YFPwt_YFPm3	0
YDR129C	Uninduced	1.35932	31967	YFPwt_YFPm3	0
YDR129C	Uninduced	1.26416	31967	YFPwt_YFPm3	0
YDR129C	Uninduced	1.06265	31967	YFPwt_YFPm3	0
YDR129C	Uninduced	1.02208	31967	YFPwt_YFPm3	0
YDR129C	Uninduced	1.02106	31967	YFPwt_YFPm3	0
YDR129C	Uninduced	1.02031	31967	YFPwt_YFPm3	0
YDR129C	Uninduced	0.93423	31967	YFPwt_YFPm3	0
YDR129C	Uninduced	0.931272	31967	YFPwt_YFPm3	0
YDR129C	Uninduced	0.915248	31967	YFPwt_YFPm3	0
YDR129C	Uninduced	0.889759	31967	YFPwt_YFPm3	0
YDR150W	Uninduced	1.47922	31967	YFPwt_YFPm3	0
YDR150W	Uninduced	1.303	31967	YFPwt_YFPm3	0
YDR150W	Uninduced	1.0329	31967	YFPwt_YFPm3	0
YDR150W	Uninduced	0.889917	31967	YFPwt_YFPm3	0
YDR150W	Uninduced	0.659979	31967	YFPwt_YFPm3	0
YDR155C	Uninduced	1.96591	31967	YFPwt_YFPm3	0
YDR155C	Uninduced	1.13907	31967	YFPwt_YFPm3	0
YDR155C	Uninduced	1.10073	31967	YFPwt_YFPm3	0
YDR155C	Uninduced	1.07695	31967	YFPwt_YFPm3	0
YDR155C	Uninduced	0.992753	31967	YFPwt_YFPm3	0
YDR155C	Uninduced	0.952744	31967	YFPwt_YFPm3	0
YDR155C	Uninduced	0.803471	31967	YFPwt_YFPm3	0
YDR155C	Uninduced	0.748839	31967	YFPwt_YFPm3	0
YDR155C	Uninduced	0.697496	31967	YFPwt_YFPm3	0
YDR155C;YML078W	Uninduced	0.795292	31967	YFPwt_YFPm3	0
YDR156W	Uninduced	0.877347	31967	YFPwt_YFPm3	0
YDR156W	Uninduced	0.675083	31967	YFPwt_YFPm3	0
YDR158W	Uninduced	1.30499	31967	YFPwt_YFPm3	0
YDR158W	Uninduced	1.12817	31967	YFPwt_YFPm3	0
YDR158W	Uninduced	0.960892	31967	YFPwt_YFPm3	0
YDR158W	Uninduced	0.596161	31967	YFPwt_YFPm3	0
YDR158W	Uninduced	0.209048	31967	YFPwt_YFPm3	0
YDR159W	Uninduced	0.956938	31967	YFPwt_YFPm3	0
YDR161W	Uninduced	1.15276	31967	YFPwt_YFPm3	0
YDR165W	Uninduced	0.952381	31967	YFPwt_YFPm3	0
YDR168W	Uninduced	1.1205	31967	YFPwt_YFPm3	0
YDR168W	Uninduced	0.443636	31967	YFPwt_YFPm3	0
YDR172W	Uninduced	0.949758	31967	YFPwt_YFPm3	0
YDR172W	Uninduced	0.947867	31967	YFPwt_YFPm3	0
YDR172W	Uninduced	0.946611	31967	YFPwt_YFPm3	0
YDR172W	Uninduced	0.846024	31967	YFPwt_YFPm3	0
YDR174W	Uninduced	1.07769	31967	YFPwt_YFPm3	0
YDR174W	Uninduced	0.943129	31967	YFPwt_YFPm3	0
YDR177W	Uninduced	0.902609	31967	YFPwt_YFPm3	0
YDR188W	Uninduced	1.05693	31967	YFPwt_YFPm3	0
YDR188W	Uninduced	1.0363	31967	YFPwt_YFPm3	0
YDR188W	Uninduced	1.03599	31967	YFPwt_YFPm3	0
YDR188W	Uninduced	1.00158	31967	YFPwt_YFPm3	0
YDR188W	Uninduced	0.977804	31967	YFPwt_YFPm3	0
YDR188W	Uninduced	0.961816	31967	YFPwt_YFPm3	0
YDR188W	Uninduced	0.942418	31967	YFPwt_YFPm3	0
YDR188W	Uninduced	0.854555	31967	YFPwt_YFPm3	0
YDR190C	Uninduced	1.11873	31967	YFPwt_YFPm3	0
YDR190C	Uninduced	0.83949	31967	YFPwt_YFPm3	0
YDR190C	Uninduced	0.6832	31967	YFPwt_YFPm3	0
YDR190C	Uninduced	0.669523	31967	YFPwt_YFPm3	0
YDR201W	Uninduced	0.965997	31967	YFPwt_YFPm3	0
YDR212W	Uninduced	1.10568	31967	YFPwt_YFPm3	0
YDR212W	Uninduced	0.958038	31967	YFPwt_YFPm3	0
YDR212W	Uninduced	0.953834	31967	YFPwt_YFPm3	0
YDR212W	Uninduced	0.781067	31967	YFPwt_YFPm3	0
YDR212W	Uninduced	0.632711	31967	YFPwt_YFPm3	0
YDR214W	Uninduced	1.80304	31967	YFPwt_YFPm3	0
YDR214W	Uninduced	1.69719	31967	YFPwt_YFPm3	0
YDR214W	Uninduced	1.00757	31967	YFPwt_YFPm3	0
YDR226W	Uninduced	1.78047	31967	YFPwt_YFPm3	0
YDR226W	Uninduced	1.29509	31967	YFPwt_YFPm3	0
YDR226W	Uninduced	1.19587	31967	YFPwt_YFPm3	0
YDR226W	Uninduced	1.08446	31967	YFPwt_YFPm3	0
YDR226W	Uninduced	1.04001	31967	YFPwt_YFPm3	0
YDR226W	Uninduced	0.984834	31967	YFPwt_YFPm3	0
YDR226W	Uninduced	0.974089	31967	YFPwt_YFPm3	0
YDR226W	Uninduced	0.948137	31967	YFPwt_YFPm3	0
YDR226W	Uninduced	0.924471	31967	YFPwt_YFPm3	0
YDR232W	Uninduced	1.45239	31967	YFPwt_YFPm3	0
YDR233C	Uninduced	1.19559	31967	YFPwt_YFPm3	0
YDR233C	Uninduced	0.958957	31967	YFPwt_YFPm3	0
YDR233C	Uninduced	0.825423	31967	YFPwt_YFPm3	0
YDR234W	Uninduced	1.01142	31967	YFPwt_YFPm3	0
YDR238C	Uninduced	0.900333	31967	YFPwt_YFPm3	0
YDR238C	Uninduced	0.889521	31967	YFPwt_YFPm3	0
YDR245W	Uninduced	1.76246	31967	YFPwt_YFPm3	0
YDR272W	Uninduced	1.0444	31967	YFPwt_YFPm3	0
YDR280W	Uninduced	1.06834	31967	YFPwt_YFPm3	0
YDR288W	Uninduced	1.18872	31967	YFPwt_YFPm3	0
YDR298C	Uninduced	1.63607	31967	YFPwt_YFPm3	0
YDR298C	Uninduced	1.07912	31967	YFPwt_YFPm3	0
YDR298C	Uninduced	0.992753	31967	YFPwt_YFPm3	0
YDR298C	Uninduced	0.972573	31967	YFPwt_YFPm3	0
YDR298C	Uninduced	0.952835	31967	YFPwt_YFPm3	0
YDR298C	Uninduced	0.937822	31967	YFPwt_YFPm3	0
YDR298C	Uninduced	0.920641	31967	YFPwt_YFPm3	0
YDR298C	Uninduced	0.912326	31967	YFPwt_YFPm3	0
YDR298C	Uninduced	0.887469	31967	YFPwt_YFPm3	0
YDR298C	Uninduced	0.886997	31967	YFPwt_YFPm3	0
YDR298C	Uninduced	0.858222	31967	YFPwt_YFPm3	0
YDR298C	Uninduced	0.755344	31967	YFPwt_YFPm3	0
YDR299W	Uninduced	1.12452	31967	YFPwt_YFPm3	0
YDR300C	Uninduced	1.17436	31967	YFPwt_YFPm3	0
YDR311W	Uninduced	3.93051	31967	YFPwt_YFPm3	0
YDR320C	Uninduced	0.745823	31967	YFPwt_YFPm3	0
YDR321W	Uninduced	1.08405	31967	YFPwt_YFPm3	0
YDR321W	Uninduced	1.07278	31967	YFPwt_YFPm3	0
YDR321W	Uninduced	0.907688	31967	YFPwt_YFPm3	0
YDR321W	Uninduced	0.889126	31967	YFPwt_YFPm3	0
YDR321W	Uninduced	0.812612	31967	YFPwt_YFPm3	0
YDR326C	Uninduced	0.107383	31967	YFPwt_YFPm3	0
YDR330W	Uninduced	0.780275	31967	YFPwt_YFPm3	0
YDR341C	Uninduced	1.05959	31967	YFPwt_YFPm3	0
YDR341C	Uninduced	1.03937	31967	YFPwt_YFPm3	0
YDR341C	Uninduced	0.981643	31967	YFPwt_YFPm3	0
YDR341C	Uninduced	0.664805	31967	YFPwt_YFPm3	0
YDR341C	Uninduced	0.572803	31967	YFPwt_YFPm3	0
YDR341C	Uninduced	0.360789	31967	YFPwt_YFPm3	0
YDR342C;YDR343C	Uninduced	1.20385	31967	YFPwt_YFPm3	0
YDR342C;YDR343C	Uninduced	0.974374	31967	YFPwt_YFPm3	0
YDR342C;YDR343C	Uninduced	0.968992	31967	YFPwt_YFPm3	0
YDR342C;YDR343C	Uninduced	0.958681	31967	YFPwt_YFPm3	0
YDR342C;YDR343C	Uninduced	0.942507	31967	YFPwt_YFPm3	0
YDR346C	Uninduced	2.34918	31967	YFPwt_YFPm3	0
YDR346C	Uninduced	0.994135	31967	YFPwt_YFPm3	0
YDR346C	Uninduced	0.974564	31967	YFPwt_YFPm3	0
YDR346C	Uninduced	0.84868	31967	YFPwt_YFPm3	0
YDR346C	Uninduced	0.792581	31967	YFPwt_YFPm3	0
YDR348C	Uninduced	0.0474361	31967	YFPwt_YFPm3	0
YDR353W	Uninduced	1.2037	31967	YFPwt_YFPm3	0
YDR353W	Uninduced	1.14439	31967	YFPwt_YFPm3	0
YDR353W	Uninduced	1.07092	31967	YFPwt_YFPm3	0
YDR353W	Uninduced	1.03614	31967	YFPwt_YFPm3	0
YDR353W	Uninduced	1.01596	31967	YFPwt_YFPm3	0
YDR353W	Uninduced	0.985513	31967	YFPwt_YFPm3	0
YDR353W	Uninduced	0.955019	31967	YFPwt_YFPm3	0
YDR353W	Uninduced	0.953471	31967	YFPwt_YFPm3	0
YDR353W	Uninduced	0.881679	31967	YFPwt_YFPm3	0
YDR353W	Uninduced	0.76864	31967	YFPwt_YFPm3	0
YDR361C	Uninduced	1.1393	31967	YFPwt_YFPm3	0
YDR361C	Uninduced	0.993443	31967	YFPwt_YFPm3	0
YDR363W-A	Uninduced	1.26619	31967	YFPwt_YFPm3	0
YDR368W	Uninduced	0.860141	31967	YFPwt_YFPm3	0
YDR368W	Uninduced	0.832016	31967	YFPwt_YFPm3	0
YDR368W;YOR120W	Uninduced	0.472545	31967	YFPwt_YFPm3	0
YDR377W	Uninduced	0.876962	31967	YFPwt_YFPm3	0
YDR378C	Uninduced	0.986291	31967	YFPwt_YFPm3	0
YDR381C-A	Uninduced	0.995917	31967	YFPwt_YFPm3	0
YDR381W	Uninduced	4.47688	31967	YFPwt_YFPm3	0
YDR381W	Uninduced	0.888415	31967	YFPwt_YFPm3	0
YDR381W	Uninduced	0.876194	31967	YFPwt_YFPm3	0
YDR382W	Uninduced	1.09057	31967	YFPwt_YFPm3	0
YDR382W	Uninduced	1.01105	31967	YFPwt_YFPm3	0
YDR382W	Uninduced	1.00626	31967	YFPwt_YFPm3	0
YDR382W	Uninduced	0.992063	31967	YFPwt_YFPm3	0
YDR382W	Uninduced	0.982415	31967	YFPwt_YFPm3	0
YDR382W	Uninduced	0.890948	31967	YFPwt_YFPm3	0
YDR382W	Uninduced	0.809192	31967	YFPwt_YFPm3	0
YDR385W;YOR133W	Uninduced	1.91175	31967	YFPwt_YFPm3	0
YDR385W;YOR133W	Uninduced	1.58464	31967	YFPwt_YFPm3	0
YDR385W;YOR133W	Uninduced	1.36292	31967	YFPwt_YFPm3	0
YDR385W;YOR133W	Uninduced	1.18854	31967	YFPwt_YFPm3	0
YDR385W;YOR133W	Uninduced	1.14385	31967	YFPwt_YFPm3	0
YDR385W;YOR133W	Uninduced	1.12832	31967	YFPwt_YFPm3	0
YDR385W;YOR133W	Uninduced	1.09383	31967	YFPwt_YFPm3	0
YDR385W;YOR133W	Uninduced	1.07834	31967	YFPwt_YFPm3	0
YDR385W;YOR133W	Uninduced	1.07477	31967	YFPwt_YFPm3	0
YDR385W;YOR133W	Uninduced	1.06537	31967	YFPwt_YFPm3	0
YDR385W;YOR133W	Uninduced	1.05902	31967	YFPwt_YFPm3	0
YDR385W;YOR133W	Uninduced	1.05289	31967	YFPwt_YFPm3	0
YDR385W;YOR133W	Uninduced	1.04301	31967	YFPwt_YFPm3	0
YDR385W;YOR133W	Uninduced	1.03775	31967	YFPwt_YFPm3	0
YDR385W;YOR133W	Uninduced	1.02532	31967	YFPwt_YFPm3	0
YDR385W;YOR133W	Uninduced	1.02434	31967	YFPwt_YFPm3	0
YDR385W;YOR133W	Uninduced	1.02082	31967	YFPwt_YFPm3	0
YDR385W;YOR133W	Uninduced	1.00489	31967	YFPwt_YFPm3	0
YDR385W;YOR133W	Uninduced	1.00172	31967	YFPwt_YFPm3	0
YDR385W;YOR133W	Uninduced	1.00083	31967	YFPwt_YFPm3	0
YDR385W;YOR133W	Uninduced	1.00061	31967	YFPwt_YFPm3	0
YDR385W;YOR133W	Uninduced	0.997506	31967	YFPwt_YFPm3	0
YDR385W;YOR133W	Uninduced	0.995124	31967	YFPwt_YFPm3	0
YDR385W;YOR133W	Uninduced	0.989315	31967	YFPwt_YFPm3	0
YDR385W;YOR133W	Uninduced	0.984737	31967	YFPwt_YFPm3	0
YDR385W;YOR133W	Uninduced	0.971628	31967	YFPwt_YFPm3	0
YDR385W;YOR133W	Uninduced	0.971157	31967	YFPwt_YFPm3	0
YDR385W;YOR133W	Uninduced	0.966184	31967	YFPwt_YFPm3	0
YDR385W;YOR133W	Uninduced	0.941974	31967	YFPwt_YFPm3	0
YDR385W;YOR133W	Uninduced	0.935891	31967	YFPwt_YFPm3	0
YDR385W;YOR133W	Uninduced	0.930492	31967	YFPwt_YFPm3	0
YDR385W;YOR133W	Uninduced	0.922765	31967	YFPwt_YFPm3	0
YDR385W;YOR133W	Uninduced	0.892698	31967	YFPwt_YFPm3	0
YDR385W;YOR133W	Uninduced	0.873439	31967	YFPwt_YFPm3	0
YDR385W;YOR133W	Uninduced	0.863111	31967	YFPwt_YFPm3	0
YDR385W;YOR133W	Uninduced	0.822436	31967	YFPwt_YFPm3	0
YDR394W	Uninduced	1.06191	31967	YFPwt_YFPm3	0
YDR395W	Uninduced	1.73304	31967	YFPwt_YFPm3	0
YDR398W	Uninduced	1.46301	31967	YFPwt_YFPm3	0
YDR418W;YEL054C	Uninduced	1.46421	31967	YFPwt_YFPm3	0
YDR418W;YEL054C	Uninduced	1.25907	31967	YFPwt_YFPm3	0
YDR418W;YEL054C	Uninduced	0.993246	31967	YFPwt_YFPm3	0
YDR418W;YEL054C	Uninduced	0.986972	31967	YFPwt_YFPm3	0
YDR418W;YEL054C	Uninduced	0.921744	31967	YFPwt_YFPm3	0
YDR418W;YEL054C	Uninduced	0.875044	31967	YFPwt_YFPm3	0
YDR424C	Uninduced	1.01128	31967	YFPwt_YFPm3	0
YDR432W	Uninduced	1.0964	31967	YFPwt_YFPm3	0
YDR432W	Uninduced	0.754546	31967	YFPwt_YFPm3	0
YDR447C;YML024W	Uninduced	2.49072	31967	YFPwt_YFPm3	0
YDR447C;YML024W	Uninduced	1.22203	31967	YFPwt_YFPm3	0
YDR447C;YML024W	Uninduced	1.1337	31967	YFPwt_YFPm3	0
YDR447C;YML024W	Uninduced	1.06833	31967	YFPwt_YFPm3	0
YDR447C;YML024W	Uninduced	1.03801	31967	YFPwt_YFPm3	0
YDR447C;YML024W	Uninduced	1.00262	31967	YFPwt_YFPm3	0
YDR447C;YML024W	Uninduced	0.991277	31967	YFPwt_YFPm3	0
YDR447C;YML024W	Uninduced	0.977326	31967	YFPwt_YFPm3	0
YDR447C;YML024W	Uninduced	0.908926	31967	YFPwt_YFPm3	0
YDR447C;YML024W	Uninduced	0.809258	31967	YFPwt_YFPm3	0
YDR450W;YML026C	Uninduced	1.341	31967	YFPwt_YFPm3	0
YDR450W;YML026C	Uninduced	1.23097	31967	YFPwt_YFPm3	0
YDR450W;YML026C	Uninduced	1.2012	31967	YFPwt_YFPm3	0
YDR450W;YML026C	Uninduced	1.06184	31967	YFPwt_YFPm3	0
YDR450W;YML026C	Uninduced	1.00496	31967	YFPwt_YFPm3	0
YDR450W;YML026C	Uninduced	0.985319	31967	YFPwt_YFPm3	0
YDR450W;YML026C	Uninduced	0.958589	31967	YFPwt_YFPm3	0
YDR450W;YML026C	Uninduced	0.934667	31967	YFPwt_YFPm3	0
YDR450W;YML026C	Uninduced	0.885034	31967	YFPwt_YFPm3	0
YDR454C	Uninduced	1.7563	31967	YFPwt_YFPm3	0
YDR454C	Uninduced	1.17414	31967	YFPwt_YFPm3	0
YDR454C	Uninduced	1.07745	31967	YFPwt_YFPm3	0
YDR454C	Uninduced	0.983671	31967	YFPwt_YFPm3	0
YDR454C	Uninduced	0.976276	31967	YFPwt_YFPm3	0
YDR487C	Uninduced	0.963391	31967	YFPwt_YFPm3	0
YDR496C	Uninduced	1.28365	31967	YFPwt_YFPm3	0
YDR496C	Uninduced	1.04279	31967	YFPwt_YFPm3	0
YDR502C	Uninduced	1.03483	31967	YFPwt_YFPm3	0
YDR502C	Uninduced	0.916926	31967	YFPwt_YFPm3	0
YDR502C	Uninduced	0.902201	31967	YFPwt_YFPm3	0
YDR502C	Uninduced	0.869036	31967	YFPwt_YFPm3	0
YDR502C;YLR180W	Uninduced	1.18754	31967	YFPwt_YFPm3	0
YDR502C;YLR180W	Uninduced	1.11662	31967	YFPwt_YFPm3	0
YDR502C;YLR180W	Uninduced	1.06068	31967	YFPwt_YFPm3	0
YDR502C;YLR180W	Uninduced	1.03994	31967	YFPwt_YFPm3	0
YDR502C;YLR180W	Uninduced	1.02438	31967	YFPwt_YFPm3	0
YDR502C;YLR180W	Uninduced	1.00456	31967	YFPwt_YFPm3	0
YDR502C;YLR180W	Uninduced	0.971912	31967	YFPwt_YFPm3	0
YDR502C;YLR180W	Uninduced	0.925926	31967	YFPwt_YFPm3	0
YDR508C	Uninduced	1.03027	31967	YFPwt_YFPm3	0
YDR510W	Uninduced	1.02637	31967	YFPwt_YFPm3	0
YDR513W	Uninduced	1.04868	31967	YFPwt_YFPm3	0
YDR513W	Uninduced	0.999001	31967	YFPwt_YFPm3	0
YDR513W	Uninduced	0.763884	31967	YFPwt_YFPm3	0
YDR513W	Uninduced	0.702543	31967	YFPwt_YFPm3	0
YDR519W	Uninduced	0.582615	31967	YFPwt_YFPm3	0
YDR529C	Uninduced	1.06374	31967	YFPwt_YFPm3	0
YDR529C	Uninduced	0.788271	31967	YFPwt_YFPm3	0
YEL013W	Uninduced	1.23877	31967	YFPwt_YFPm3	0
YEL013W	Uninduced	0.952925	31967	YFPwt_YFPm3	0
YEL020W-A	Uninduced	0.993443	31967	YFPwt_YFPm3	0
YEL024W	Uninduced	1.54497	31967	YFPwt_YFPm3	0
YEL024W	Uninduced	0.898392	31967	YFPwt_YFPm3	0
YEL024W	Uninduced	0.698519	31967	YFPwt_YFPm3	0
YEL029C	Uninduced	0.634357	31967	YFPwt_YFPm3	0
YEL031W	Uninduced	1.21352	31967	YFPwt_YFPm3	0
YEL031W	Uninduced	0.986777	31967	YFPwt_YFPm3	0
YEL031W	Uninduced	0.909753	31967	YFPwt_YFPm3	0
YEL031W	Uninduced	0.802311	31967	YFPwt_YFPm3	0
YEL034W	Uninduced	5.28653	31967	YFPwt_YFPm3	0
YEL034W	Uninduced	1.08726	31967	YFPwt_YFPm3	0
YEL034W	Uninduced	1.06142	31967	YFPwt_YFPm3	0
YEL034W	Uninduced	0.961446	31967	YFPwt_YFPm3	0
YEL034W	Uninduced	0.897747	31967	YFPwt_YFPm3	0
YEL034W;YJR047C	Uninduced	0.91878	31967	YFPwt_YFPm3	0
YEL037C	Uninduced	0.90212	31967	YFPwt_YFPm3	0
YEL037C	Uninduced	0.898957	31967	YFPwt_YFPm3	0
YEL038W	Uninduced	0.771069	31967	YFPwt_YFPm3	0
YEL042W	Uninduced	0.993049	31967	YFPwt_YFPm3	0
YEL046C	Uninduced	1.08773	31967	YFPwt_YFPm3	0
YEL046C	Uninduced	1.03226	31967	YFPwt_YFPm3	0
YEL047C	Uninduced	0.9994	31967	YFPwt_YFPm3	0
YEL047C	Uninduced	0.953198	31967	YFPwt_YFPm3	0
YEL047C	Uninduced	0.868056	31967	YFPwt_YFPm3	0
YEL047C	Uninduced	0.614931	31967	YFPwt_YFPm3	0
YEL051W	Uninduced	1.16649	31967	YFPwt_YFPm3	0
YEL055C	Uninduced	1.03043	31967	YFPwt_YFPm3	0
YEL055C	Uninduced	0.980392	31967	YFPwt_YFPm3	0
YEL071W	Uninduced	1.0584	31967	YFPwt_YFPm3	0
YEL071W	Uninduced	1.04936	31967	YFPwt_YFPm3	0
YER002W	Uninduced	0.896781	31967	YFPwt_YFPm3	0
YER003C	Uninduced	1.04156	31967	YFPwt_YFPm3	0
YER003C	Uninduced	0.906947	31967	YFPwt_YFPm3	0
YER003C	Uninduced	0.856531	31967	YFPwt_YFPm3	0
YER005W	Uninduced	0.29118	31967	YFPwt_YFPm3	0
YER006W	Uninduced	1.49622	31967	YFPwt_YFPm3	0
YER006W	Uninduced	1.22904	31967	YFPwt_YFPm3	0
YER006W	Uninduced	1.0031	31967	YFPwt_YFPm3	0
YER006W	Uninduced	0.955749	31967	YFPwt_YFPm3	0
YER006W	Uninduced	0.910084	31967	YFPwt_YFPm3	0
YER006W	Uninduced	0.82352	31967	YFPwt_YFPm3	0
YER007C-A	Uninduced	0.958313	31967	YFPwt_YFPm3	0
YER007C-A	Uninduced	0.923361	31967	YFPwt_YFPm3	0
YER007C-A	Uninduced	0.905551	31967	YFPwt_YFPm3	0
YER007C-A	Uninduced	0.860659	31967	YFPwt_YFPm3	0
YER021W	Uninduced	0.803923	31967	YFPwt_YFPm3	0
YER023W	Uninduced	3.49932	31967	YFPwt_YFPm3	0
YER023W	Uninduced	1.26497	31967	YFPwt_YFPm3	0
YER023W	Uninduced	1.10258	31967	YFPwt_YFPm3	0
YER023W	Uninduced	1.06844	31967	YFPwt_YFPm3	0
YER023W	Uninduced	0.851861	31967	YFPwt_YFPm3	0
YER023W	Uninduced	0.745823	31967	YFPwt_YFPm3	0
YER025W	Uninduced	0.970214	31967	YFPwt_YFPm3	0
YER025W	Uninduced	0.911162	31967	YFPwt_YFPm3	0
YER025W	Uninduced	0.888889	31967	YFPwt_YFPm3	0
YER025W	Uninduced	0.867002	31967	YFPwt_YFPm3	0
YER025W	Uninduced	0.235716	31967	YFPwt_YFPm3	0
YER031C	Uninduced	1.01025	31967	YFPwt_YFPm3	0
YER031C;YGL210W	Uninduced	1.08871	31967	YFPwt_YFPm3	0
YER036C	Uninduced	15.7721	31967	YFPwt_YFPm3	0
YER036C	Uninduced	1.08313	31967	YFPwt_YFPm3	0
YER036C	Uninduced	1.0752	31967	YFPwt_YFPm3	0
YER036C	Uninduced	1.0359	31967	YFPwt_YFPm3	0
YER036C	Uninduced	1.02588	31967	YFPwt_YFPm3	0
YER036C	Uninduced	0.960615	31967	YFPwt_YFPm3	0
YER036C	Uninduced	0.92816	31967	YFPwt_YFPm3	0
YER036C	Uninduced	0.924214	31967	YFPwt_YFPm3	0
YER036C	Uninduced	0.549149	31967	YFPwt_YFPm3	0
YER041W	Uninduced	0.804959	31967	YFPwt_YFPm3	0
YER042W	Uninduced	0.912409	31967	YFPwt_YFPm3	0
YER043C	Uninduced	1.975	31967	YFPwt_YFPm3	0
YER043C	Uninduced	1.42629	31967	YFPwt_YFPm3	0
YER043C	Uninduced	1.2588	31967	YFPwt_YFPm3	0
YER043C	Uninduced	1.18128	31967	YFPwt_YFPm3	0
YER043C	Uninduced	1.12327	31967	YFPwt_YFPm3	0
YER043C	Uninduced	1.08407	31967	YFPwt_YFPm3	0
YER043C	Uninduced	1.06402	31967	YFPwt_YFPm3	0
YER043C	Uninduced	1.04677	31967	YFPwt_YFPm3	0
YER043C	Uninduced	1.04129	31967	YFPwt_YFPm3	0
YER043C	Uninduced	1.03926	31967	YFPwt_YFPm3	0
YER043C	Uninduced	1.00865	31967	YFPwt_YFPm3	0
YER043C	Uninduced	1.00127	31967	YFPwt_YFPm3	0
YER043C	Uninduced	0.989022	31967	YFPwt_YFPm3	0
YER043C	Uninduced	0.977613	31967	YFPwt_YFPm3	0
YER043C	Uninduced	0.967867	31967	YFPwt_YFPm3	0
YER043C	Uninduced	0.953743	31967	YFPwt_YFPm3	0
YER043C	Uninduced	0.952744	31967	YFPwt_YFPm3	0
YER043C	Uninduced	0.94509	31967	YFPwt_YFPm3	0
YER043C	Uninduced	0.840548	31967	YFPwt_YFPm3	0
YER043C	Uninduced	0.789827	31967	YFPwt_YFPm3	0
YER048C	Uninduced	0.916254	31967	YFPwt_YFPm3	0
YER048C	Uninduced	0.894694	31967	YFPwt_YFPm3	0
YER048C	Uninduced	0.53268	31967	YFPwt_YFPm3	0
YER048C	Uninduced	0.0708717	31967	YFPwt_YFPm3	0
YER049W	Uninduced	0.832848	31967	YFPwt_YFPm3	0
YER052C	Uninduced	0.841751	31967	YFPwt_YFPm3	0
YER055C	Uninduced	1.50898	31967	YFPwt_YFPm3	0
YER056C-A;YIL052C	Uninduced	0.984931	31967	YFPwt_YFPm3	0
YER057C	Uninduced	1.22359	31967	YFPwt_YFPm3	0
YER062C	Uninduced	0.926784	31967	YFPwt_YFPm3	0
YER062C	Uninduced	0.790014	31967	YFPwt_YFPm3	0
YER062C	Uninduced	0.420451	31967	YFPwt_YFPm3	0
YER063W	Uninduced	0.933707	31967	YFPwt_YFPm3	0
YER067W	Uninduced	1.27535	31967	YFPwt_YFPm3	0
YER070W	Uninduced	1.4214	31967	YFPwt_YFPm3	0
YER070W	Uninduced	0.973047	31967	YFPwt_YFPm3	0
YER070W	Uninduced	0.971817	31967	YFPwt_YFPm3	0
YER070W	Uninduced	0.732493	31967	YFPwt_YFPm3	0
YER070W	Uninduced	0.297539	31967	YFPwt_YFPm3	0
YER071C	Uninduced	0.843526	31967	YFPwt_YFPm3	0
YER073W	Uninduced	1.3286	31967	YFPwt_YFPm3	0
YER074W;YIL069C	Uninduced	1.37465	31967	YFPwt_YFPm3	0
YER074W;YIL069C	Uninduced	1.13954	31967	YFPwt_YFPm3	0
YER074W;YIL069C	Uninduced	0.984349	31967	YFPwt_YFPm3	0
YER074W;YIL069C	Uninduced	0.975324	31967	YFPwt_YFPm3	0
YER074W;YIL069C	Uninduced	0.949037	31967	YFPwt_YFPm3	0
YER074W;YIL069C	Uninduced	0.906043	31967	YFPwt_YFPm3	0
YER074W;YIL069C	Uninduced	0.895015	31967	YFPwt_YFPm3	0
YER074W;YIL069C	Uninduced	0.837731	31967	YFPwt_YFPm3	0
YER074W;YIL069C	Uninduced	0.797894	31967	YFPwt_YFPm3	0
YER080W	Uninduced	1.17214	31967	YFPwt_YFPm3	0
YER080W	Uninduced	0.626802	31967	YFPwt_YFPm3	0
YER080W	Uninduced	0.603682	31967	YFPwt_YFPm3	0
YER081W	Uninduced	1.27272	31967	YFPwt_YFPm3	0
YER081W	Uninduced	0.988924	31967	YFPwt_YFPm3	0
YER083C	Uninduced	1.31921	31967	YFPwt_YFPm3	0
YER083C	Uninduced	0.555247	31967	YFPwt_YFPm3	0
YER086W	Uninduced	1.07485	31967	YFPwt_YFPm3	0
YER087C-B	Uninduced	0.931272	31967	YFPwt_YFPm3	0
YER089C	Uninduced	1.17215	31967	YFPwt_YFPm3	0
YER090W	Uninduced	1.19814	31967	YFPwt_YFPm3	0
YER090W	Uninduced	1.05694	31967	YFPwt_YFPm3	0
YER090W	Uninduced	0.900657	31967	YFPwt_YFPm3	0
YER090W	Uninduced	0.69056	31967	YFPwt_YFPm3	0
YER090W	Uninduced	0.488019	31967	YFPwt_YFPm3	0
YER091C	Uninduced	4.02188	31967	YFPwt_YFPm3	0
YER091C	Uninduced	1.59826	31967	YFPwt_YFPm3	0
YER091C	Uninduced	1.54926	31967	YFPwt_YFPm3	0
YER091C	Uninduced	1.41623	31967	YFPwt_YFPm3	0
YER091C	Uninduced	1.33572	31967	YFPwt_YFPm3	0
YER091C	Uninduced	1.32004	31967	YFPwt_YFPm3	0
YER091C	Uninduced	1.23867	31967	YFPwt_YFPm3	0
YER091C	Uninduced	1.2203	31967	YFPwt_YFPm3	0
YER091C	Uninduced	1.19407	31967	YFPwt_YFPm3	0
YER091C	Uninduced	1.18828	31967	YFPwt_YFPm3	0
YER091C	Uninduced	1.16124	31967	YFPwt_YFPm3	0
YER091C	Uninduced	1.14375	31967	YFPwt_YFPm3	0
YER091C	Uninduced	1.14072	31967	YFPwt_YFPm3	0
YER091C	Uninduced	1.13395	31967	YFPwt_YFPm3	0
YER091C	Uninduced	1.06703	31967	YFPwt_YFPm3	0
YER091C	Uninduced	1.05654	31967	YFPwt_YFPm3	0
YER091C	Uninduced	1.05159	31967	YFPwt_YFPm3	0
YER091C	Uninduced	1.01935	31967	YFPwt_YFPm3	0
YER091C	Uninduced	1.01412	31967	YFPwt_YFPm3	0
YER091C	Uninduced	1.01343	31967	YFPwt_YFPm3	0
YER091C	Uninduced	1.01019	31967	YFPwt_YFPm3	0
YER091C	Uninduced	1.00858	31967	YFPwt_YFPm3	0
YER091C	Uninduced	1.00846	31967	YFPwt_YFPm3	0
YER091C	Uninduced	1	31967	YFPwt_YFPm3	0
YER091C	Uninduced	0.997208	31967	YFPwt_YFPm3	0
YER091C	Uninduced	0.990884	31967	YFPwt_YFPm3	0
YER091C	Uninduced	0.975991	31967	YFPwt_YFPm3	0
YER091C	Uninduced	0.970214	31967	YFPwt_YFPm3	0
YER091C	Uninduced	0.966931	31967	YFPwt_YFPm3	0
YER091C	Uninduced	0.965065	31967	YFPwt_YFPm3	0
YER091C	Uninduced	0.943218	31967	YFPwt_YFPm3	0
YER091C	Uninduced	0.904486	31967	YFPwt_YFPm3	0
YER091C	Uninduced	0.496204	31967	YFPwt_YFPm3	0
YER103W	Uninduced	0.926355	31967	YFPwt_YFPm3	0
YER107C	Uninduced	0.981932	31967	YFPwt_YFPm3	0
YER110C	Uninduced	1.37872	31967	YFPwt_YFPm3	0
YER110C	Uninduced	1.24757	31967	YFPwt_YFPm3	0
YER110C	Uninduced	1.12677	31967	YFPwt_YFPm3	0
YER110C	Uninduced	1.07131	31967	YFPwt_YFPm3	0
YER110C	Uninduced	1.05973	31967	YFPwt_YFPm3	0
YER110C	Uninduced	1.0516	31967	YFPwt_YFPm3	0
YER110C	Uninduced	1.00107	31967	YFPwt_YFPm3	0
YER110C	Uninduced	0.992851	31967	YFPwt_YFPm3	0
YER110C	Uninduced	0.935629	31967	YFPwt_YFPm3	0
YER110C	Uninduced	0.933968	31967	YFPwt_YFPm3	0
YER110C	Uninduced	0.914913	31967	YFPwt_YFPm3	0
YER110C	Uninduced	0.907441	31967	YFPwt_YFPm3	0
YER110C	Uninduced	0.850196	31967	YFPwt_YFPm3	0
YER110C	Uninduced	0.787278	31967	YFPwt_YFPm3	0
YER110C	Uninduced	0.567537	31967	YFPwt_YFPm3	0
YER110C	Uninduced	0.0624064	31967	YFPwt_YFPm3	0
YER112W	Uninduced	1.10798	31967	YFPwt_YFPm3	0
YER120W	Uninduced	1.44429	31967	YFPwt_YFPm3	0
YER120W	Uninduced	1.05223	31967	YFPwt_YFPm3	0
YER120W	Uninduced	0.84832	31967	YFPwt_YFPm3	0
YER120W	Uninduced	0.843739	31967	YFPwt_YFPm3	0
YER122C	Uninduced	1.05916	31967	YFPwt_YFPm3	0
YER125W	Uninduced	1.00695	31967	YFPwt_YFPm3	0
YER133W	Uninduced	0.915164	31967	YFPwt_YFPm3	0
YER136W	Uninduced	1.56686	31967	YFPwt_YFPm3	0
YER136W	Uninduced	1.29166	31967	YFPwt_YFPm3	0
YER136W	Uninduced	1.02324	31967	YFPwt_YFPm3	0
YER136W	Uninduced	0.722335	31967	YFPwt_YFPm3	0
YER138C;YLR157C-B;YPL257W-B;YDR261C-D;YML039W;YJR029W;YGR027W-B;YOL103W-B	Uninduced	1.21835	31967	YFPwt_YFPm3	0
YER138C;YLR157C-B;YPL257W-B;YDR261C-D;YML045W;YNL284C-B;YAR009C;YLR035C-A;YML039W;YJR029W;YGR027W-B;YOL103W-B;YPR137C-B;YNL054W-B;YPR158C-D;YPR158W-B;YDR316W-B;YMR050C;YOR142W-B;YHR214C-B;YGR161C-D;YBR012W-B;YER160C;YMR045C;YBL005W-B	Uninduced	1.14994	31967	YFPwt_YFPm3	0
YER138C;YLR157C-B;YPL257W-B;YDR261C-D;YML045W;YNL284C-B;YML039W;YJR029W;YOL103W-B;YPR137C-B;YNL054W-B;YPR158W-B;YDR316W-B;YMR050C;YOR142W-B;YHR214C-B;YGR161C-D;YBR012W-B;YER160C;YMR045C;YBL005W-B	Uninduced	1.38508	31967	YFPwt_YFPm3	0
YER146W	Uninduced	0.823452	31967	YFPwt_YFPm3	0
YER148W	Uninduced	0.673355	31967	YFPwt_YFPm3	0
YER151C	Uninduced	0.17449	31967	YFPwt_YFPm3	0
YER156C	Uninduced	1.48748	31967	YFPwt_YFPm3	0
YER165W	Uninduced	1.36876	31967	YFPwt_YFPm3	0
YER165W	Uninduced	1.23818	31967	YFPwt_YFPm3	0
YER165W	Uninduced	1.13937	31967	YFPwt_YFPm3	0
YER165W	Uninduced	1.10292	31967	YFPwt_YFPm3	0
YER165W	Uninduced	1.09582	31967	YFPwt_YFPm3	0
YER165W	Uninduced	1.0953	31967	YFPwt_YFPm3	0
YER165W	Uninduced	1.09037	31967	YFPwt_YFPm3	0
YER165W	Uninduced	1.06243	31967	YFPwt_YFPm3	0
YER165W	Uninduced	1.0541	31967	YFPwt_YFPm3	0
YER165W	Uninduced	1.04179	31967	YFPwt_YFPm3	0
YER165W	Uninduced	1.01447	31967	YFPwt_YFPm3	0
YER165W	Uninduced	1.0001	31967	YFPwt_YFPm3	0
YER165W	Uninduced	0.996612	31967	YFPwt_YFPm3	0
YER165W	Uninduced	0.993542	31967	YFPwt_YFPm3	0
YER165W	Uninduced	0.987264	31967	YFPwt_YFPm3	0
YER165W	Uninduced	0.935979	31967	YFPwt_YFPm3	0
YER165W	Uninduced	0.931532	31967	YFPwt_YFPm3	0
YER165W	Uninduced	0.90009	31967	YFPwt_YFPm3	0
YER165W	Uninduced	0.875503	31967	YFPwt_YFPm3	0
YER165W	Uninduced	0.721397	31967	YFPwt_YFPm3	0
YER177W	Uninduced	4.74068	31967	YFPwt_YFPm3	0
YER177W	Uninduced	0.97704	31967	YFPwt_YFPm3	0
YER178W	Uninduced	1.09175	31967	YFPwt_YFPm3	0
YER178W	Uninduced	0.984252	31967	YFPwt_YFPm3	0
YER178W	Uninduced	0.946253	31967	YFPwt_YFPm3	0
YFL005W	Uninduced	1.27012	31967	YFPwt_YFPm3	0
YFL005W	Uninduced	1.06264	31967	YFPwt_YFPm3	0
YFL005W	Uninduced	0.97144	31967	YFPwt_YFPm3	0
YFL005W	Uninduced	0.942329	31967	YFPwt_YFPm3	0
YFL005W	Uninduced	0.912742	31967	YFPwt_YFPm3	0
YFL014W	Uninduced	1.39719	31967	YFPwt_YFPm3	0
YFL014W	Uninduced	0.980296	31967	YFPwt_YFPm3	0
YFL014W	Uninduced	0.947329	31967	YFPwt_YFPm3	0
YFL014W	Uninduced	0.916086	31967	YFPwt_YFPm3	0
YFL014W	Uninduced	0.885504	31967	YFPwt_YFPm3	0
YFL018C	Uninduced	3.51247	31967	YFPwt_YFPm3	0
YFL018C	Uninduced	1.48375	31967	YFPwt_YFPm3	0
YFL018C	Uninduced	1.3381	31967	YFPwt_YFPm3	0
YFL018C	Uninduced	1.18834	31967	YFPwt_YFPm3	0
YFL018C	Uninduced	1.05908	31967	YFPwt_YFPm3	0
YFL018C	Uninduced	1.04788	31967	YFPwt_YFPm3	0
YFL018C	Uninduced	1.02662	31967	YFPwt_YFPm3	0
YFL018C	Uninduced	0.929368	31967	YFPwt_YFPm3	0
YFL018C	Uninduced	0.922594	31967	YFPwt_YFPm3	0
YFL018C	Uninduced	0.909091	31967	YFPwt_YFPm3	0
YFL018C	Uninduced	0.815262	31967	YFPwt_YFPm3	0
YFL018C	Uninduced	0.805283	31967	YFPwt_YFPm3	0
YFL018C	Uninduced	0.482859	31967	YFPwt_YFPm3	0
YFL022C	Uninduced	1.14668	31967	YFPwt_YFPm3	0
YFL022C	Uninduced	1.08965	31967	YFPwt_YFPm3	0
YFL022C	Uninduced	1.01978	31967	YFPwt_YFPm3	0
YFL022C	Uninduced	1.00512	31967	YFPwt_YFPm3	0
YFL022C	Uninduced	0.748503	31967	YFPwt_YFPm3	0
YFL022C	Uninduced	0.655609	31967	YFPwt_YFPm3	0
YFL023W	Uninduced	1.3811	31967	YFPwt_YFPm3	0
YFL023W	Uninduced	0.381505	31967	YFPwt_YFPm3	0
YFL030W	Uninduced	0.250332	31967	YFPwt_YFPm3	0
YFL034C-A	Uninduced	1.2488	31967	YFPwt_YFPm3	0
YFL034C-A;YLR061W	Uninduced	1.02952	31967	YFPwt_YFPm3	0
YFL034C-A;YLR061W	Uninduced	0.936944	31967	YFPwt_YFPm3	0
YFL037W	Uninduced	0.944198	31967	YFPwt_YFPm3	0
YFL037W	Uninduced	0.755116	31967	YFPwt_YFPm3	0
YFL038C	Uninduced	1.266	31967	YFPwt_YFPm3	0
YFL038C	Uninduced	1.01105	31967	YFPwt_YFPm3	0
YFL038C	Uninduced	0.703284	31967	YFPwt_YFPm3	0
YFL039C	Uninduced	1.39532	31967	YFPwt_YFPm3	0
YFL039C	Uninduced	1.30528	31967	YFPwt_YFPm3	0
YFL039C	Uninduced	1.06978	31967	YFPwt_YFPm3	0
YFL039C	Uninduced	1.0237	31967	YFPwt_YFPm3	0
YFL039C	Uninduced	1.02324	31967	YFPwt_YFPm3	0
YFL039C	Uninduced	0.974374	31967	YFPwt_YFPm3	0
YFL039C	Uninduced	0.967492	31967	YFPwt_YFPm3	0
YFL039C	Uninduced	0.949848	31967	YFPwt_YFPm3	0
YFL039C	Uninduced	0.935541	31967	YFPwt_YFPm3	0
YFL039C	Uninduced	0.883939	31967	YFPwt_YFPm3	0
YFL039C	Uninduced	0.866251	31967	YFPwt_YFPm3	0
YFL039C	Uninduced	0.687711	31967	YFPwt_YFPm3	0
YFL044C	Uninduced	10.7079	31967	YFPwt_YFPm3	0
YFL045C	Uninduced	1.29571	31967	YFPwt_YFPm3	0
YFL045C	Uninduced	1.16205	31967	YFPwt_YFPm3	0
YFL045C	Uninduced	1.03906	31967	YFPwt_YFPm3	0
YFL045C	Uninduced	0.991179	31967	YFPwt_YFPm3	0
YFL045C	Uninduced	0.932575	31967	YFPwt_YFPm3	0
YFL048C	Uninduced	0.742335	31967	YFPwt_YFPm3	0
YFR006W	Uninduced	1.1417	31967	YFPwt_YFPm3	0
YFR009W	Uninduced	1.07389	31967	YFPwt_YFPm3	0
YFR009W	Uninduced	0.550025	31967	YFPwt_YFPm3	0
YFR010W	Uninduced	0.890551	31967	YFPwt_YFPm3	0
YFR010W	Uninduced	0.885426	31967	YFPwt_YFPm3	0
YFR010W	Uninduced	0.834098	31967	YFPwt_YFPm3	0
YFR011C	Uninduced	1.18892	31967	YFPwt_YFPm3	0
YFR011C	Uninduced	1.07631	31967	YFPwt_YFPm3	0
YFR031C-A;YIL018W	Uninduced	32.204	31967	YFPwt_YFPm3	0
YFR031C-A;YIL018W	Uninduced	1.03922	31967	YFPwt_YFPm3	0
YFR031C-A;YIL018W	Uninduced	1.00654	31967	YFPwt_YFPm3	0
YFR031C-A;YIL018W	Uninduced	0.999201	31967	YFPwt_YFPm3	0
YFR031C-A;YIL018W	Uninduced	0.986875	31967	YFPwt_YFPm3	0
YFR031C-A;YIL018W	Uninduced	0.959509	31967	YFPwt_YFPm3	0
YFR031C-A;YIL018W	Uninduced	0.933881	31967	YFPwt_YFPm3	0
YFR031C-A;YIL018W	Uninduced	0.927902	31967	YFPwt_YFPm3	0
YFR031C-A;YIL018W	Uninduced	0.899442	31967	YFPwt_YFPm3	0
YFR031C-A;YIL018W	Uninduced	0.869112	31967	YFPwt_YFPm3	0
YFR031C-A;YIL018W	Uninduced	0.864155	31967	YFPwt_YFPm3	0
YFR031C-A;YIL018W	Uninduced	0.856898	31967	YFPwt_YFPm3	0
YFR031C-A;YIL018W	Uninduced	0.770535	31967	YFPwt_YFPm3	0
YFR031C-A;YIL018W	Uninduced	0.760283	31967	YFPwt_YFPm3	0
YFR033C	Uninduced	0.918611	31967	YFPwt_YFPm3	0
YFR033C	Uninduced	0.864379	31967	YFPwt_YFPm3	0
YFR037C	Uninduced	0.975705	31967	YFPwt_YFPm3	0
YFR037C	Uninduced	0.76599	31967	YFPwt_YFPm3	0
YFR044C	Uninduced	1.5751	31967	YFPwt_YFPm3	0
YFR044C	Uninduced	1.17936	31967	YFPwt_YFPm3	0
YFR044C	Uninduced	0.930233	31967	YFPwt_YFPm3	0
YFR044C	Uninduced	0.772618	31967	YFPwt_YFPm3	0
YFR051C	Uninduced	1.16106	31967	YFPwt_YFPm3	0
YFR052W	Uninduced	1.09895	31967	YFPwt_YFPm3	0
YFR053C	Uninduced	1.48703	31967	YFPwt_YFPm3	0
YFR053C	Uninduced	1.45271	31967	YFPwt_YFPm3	0
YFR053C	Uninduced	1.34073	31967	YFPwt_YFPm3	0
YFR053C	Uninduced	1.29651	31967	YFPwt_YFPm3	0
YFR053C	Uninduced	1.23373	31967	YFPwt_YFPm3	0
YFR053C	Uninduced	1.10602	31967	YFPwt_YFPm3	0
YFR053C	Uninduced	1.0772	31967	YFPwt_YFPm3	0
YFR053C	Uninduced	1.00591	31967	YFPwt_YFPm3	0
YFR053C	Uninduced	1.00238	31967	YFPwt_YFPm3	0
YFR053C	Uninduced	0.998602	31967	YFPwt_YFPm3	0
YFR053C	Uninduced	0.997407	31967	YFPwt_YFPm3	0
YFR053C	Uninduced	0.991179	31967	YFPwt_YFPm3	0
YFR053C	Uninduced	0.990197	31967	YFPwt_YFPm3	0
YFR053C	Uninduced	0.960523	31967	YFPwt_YFPm3	0
YFR053C	Uninduced	0.956114	31967	YFPwt_YFPm3	0
YFR053C	Uninduced	0.952109	31967	YFPwt_YFPm3	0
YFR053C	Uninduced	0.920048	31967	YFPwt_YFPm3	0
YFR053C	Uninduced	0.900414	31967	YFPwt_YFPm3	0
YFR053C	Uninduced	0.898473	31967	YFPwt_YFPm3	0
YFR053C	Uninduced	0.805997	31967	YFPwt_YFPm3	0
YFR053C	Uninduced	0.465788	31967	YFPwt_YFPm3	0
YFR053C;YGL253W	Uninduced	1.14983	31967	YFPwt_YFPm3	0
YFR053C;YGL253W	Uninduced	0.995124	31967	YFPwt_YFPm3	0
YGL004C	Uninduced	2.06937	31967	YFPwt_YFPm3	0
YGL008C	Uninduced	1.09463	31967	YFPwt_YFPm3	0
YGL008C	Uninduced	1.02813	31967	YFPwt_YFPm3	0
YGL008C	Uninduced	1.00737	31967	YFPwt_YFPm3	0
YGL008C	Uninduced	0.960984	31967	YFPwt_YFPm3	0
YGL008C	Uninduced	0.759474	31967	YFPwt_YFPm3	0
YGL008C;YPL036W	Uninduced	1.56649	31967	YFPwt_YFPm3	0
YGL008C;YPL036W	Uninduced	1.20847	31967	YFPwt_YFPm3	0
YGL008C;YPL036W	Uninduced	1.16518	31967	YFPwt_YFPm3	0
YGL008C;YPL036W	Uninduced	1.13932	31967	YFPwt_YFPm3	0
YGL008C;YPL036W	Uninduced	1.13621	31967	YFPwt_YFPm3	0
YGL008C;YPL036W	Uninduced	0.990001	31967	YFPwt_YFPm3	0
YGL008C;YPL036W	Uninduced	0.988631	31967	YFPwt_YFPm3	0
YGL008C;YPL036W	Uninduced	0.982415	31967	YFPwt_YFPm3	0
YGL008C;YPL036W	Uninduced	0.972573	31967	YFPwt_YFPm3	0
YGL008C;YPL036W	Uninduced	0.959509	31967	YFPwt_YFPm3	0
YGL008C;YPL036W	Uninduced	0.895496	31967	YFPwt_YFPm3	0
YGL008C;YPL036W	Uninduced	0.766107	31967	YFPwt_YFPm3	0
YGL008C;YPL036W	Uninduced	0.754717	31967	YFPwt_YFPm3	0
YGL008C;YPL036W	Uninduced	0.655609	31967	YFPwt_YFPm3	0
YGL009C	Uninduced	1.10333	31967	YFPwt_YFPm3	0
YGL009C	Uninduced	1.10108	31967	YFPwt_YFPm3	0
YGL009C	Uninduced	0.944822	31967	YFPwt_YFPm3	0
YGL009C	Uninduced	0.886368	31967	YFPwt_YFPm3	0
YGL009C	Uninduced	0.759936	31967	YFPwt_YFPm3	0
YGL011C	Uninduced	6.943	31967	YFPwt_YFPm3	0
YGL011C	Uninduced	1.40481	31967	YFPwt_YFPm3	0
YGL011C	Uninduced	1.32322	31967	YFPwt_YFPm3	0
YGL011C	Uninduced	1.13652	31967	YFPwt_YFPm3	0
YGL011C	Uninduced	1.01192	31967	YFPwt_YFPm3	0
YGL011C	Uninduced	0.94697	31967	YFPwt_YFPm3	0
YGL012W	Uninduced	1.22188	31967	YFPwt_YFPm3	0
YGL026C	Uninduced	2.45954	31967	YFPwt_YFPm3	0
YGL026C	Uninduced	1.554	31967	YFPwt_YFPm3	0
YGL026C	Uninduced	1.2681	31967	YFPwt_YFPm3	0
YGL026C	Uninduced	1.18741	31967	YFPwt_YFPm3	0
YGL026C	Uninduced	1.17571	31967	YFPwt_YFPm3	0
YGL026C	Uninduced	1.13833	31967	YFPwt_YFPm3	0
YGL026C	Uninduced	1.03492	31967	YFPwt_YFPm3	0
YGL026C	Uninduced	1.02868	31967	YFPwt_YFPm3	0
YGL026C	Uninduced	0.980104	31967	YFPwt_YFPm3	0
YGL026C	Uninduced	0.973141	31967	YFPwt_YFPm3	0
YGL026C	Uninduced	0.938086	31967	YFPwt_YFPm3	0
YGL026C	Uninduced	0.921659	31967	YFPwt_YFPm3	0
YGL026C	Uninduced	0.900982	31967	YFPwt_YFPm3	0
YGL026C	Uninduced	0.857854	31967	YFPwt_YFPm3	0
YGL030W	Uninduced	1.36797	31967	YFPwt_YFPm3	0
YGL030W	Uninduced	1.02376	31967	YFPwt_YFPm3	0
YGL030W	Uninduced	1.01391	31967	YFPwt_YFPm3	0
YGL030W	Uninduced	1.00364	31967	YFPwt_YFPm3	0
YGL030W	Uninduced	0.992654	31967	YFPwt_YFPm3	0
YGL030W	Uninduced	0.976467	31967	YFPwt_YFPm3	0
YGL030W	Uninduced	0.883861	31967	YFPwt_YFPm3	0
YGL030W	Uninduced	0.776217	31967	YFPwt_YFPm3	0
YGL031C	Uninduced	1.15596	31967	YFPwt_YFPm3	0
YGL035C	Uninduced	2.09258	31967	YFPwt_YFPm3	0
YGL037C	Uninduced	1.28512	31967	YFPwt_YFPm3	0
YGL037C	Uninduced	0.912742	31967	YFPwt_YFPm3	0
YGL037C	Uninduced	0.866101	31967	YFPwt_YFPm3	0
YGL040C	Uninduced	1.64815	31967	YFPwt_YFPm3	0
YGL043W	Uninduced	1.11618	31967	YFPwt_YFPm3	0
YGL048C	Uninduced	1.08171	31967	YFPwt_YFPm3	0
YGL055W	Uninduced	1.63375	31967	YFPwt_YFPm3	0
YGL055W	Uninduced	1.26691	31967	YFPwt_YFPm3	0
YGL055W	Uninduced	1.25508	31967	YFPwt_YFPm3	0
YGL055W	Uninduced	0.864603	31967	YFPwt_YFPm3	0
YGL062W	Uninduced	1.11105	31967	YFPwt_YFPm3	0
YGL062W	Uninduced	0.870853	31967	YFPwt_YFPm3	0
YGL068W	Uninduced	0.996115	31967	YFPwt_YFPm3	0
YGL068W	Uninduced	0.839913	31967	YFPwt_YFPm3	0
YGL068W	Uninduced	0.790139	31967	YFPwt_YFPm3	0
YGL076C	Uninduced	0.800064	31967	YFPwt_YFPm3	0
YGL076C;YPL198W	Uninduced	1.14841	31967	YFPwt_YFPm3	0
YGL076C;YPL198W	Uninduced	1.01087	31967	YFPwt_YFPm3	0
YGL076C;YPL198W	Uninduced	1.00893	31967	YFPwt_YFPm3	0
YGL076C;YPL198W	Uninduced	0.942951	31967	YFPwt_YFPm3	0
YGL076C;YPL198W	Uninduced	0.942951	31967	YFPwt_YFPm3	0
YGL076C;YPL198W	Uninduced	0.941442	31967	YFPwt_YFPm3	0
YGL076C;YPL198W	Uninduced	0.893096	31967	YFPwt_YFPm3	0
YGL083W	Uninduced	1.20795	31967	YFPwt_YFPm3	0
YGL097W	Uninduced	1.03773	31967	YFPwt_YFPm3	0
YGL099W	Uninduced	1.56023	31967	YFPwt_YFPm3	0
YGL099W	Uninduced	0.873515	31967	YFPwt_YFPm3	0
YGL099W	Uninduced	0.855505	31967	YFPwt_YFPm3	0
YGL103W	Uninduced	1.03256	31967	YFPwt_YFPm3	0
YGL103W	Uninduced	1.02605	31967	YFPwt_YFPm3	0
YGL103W	Uninduced	0.968242	31967	YFPwt_YFPm3	0
YGL103W	Uninduced	0.953198	31967	YFPwt_YFPm3	0
YGL103W	Uninduced	0.900414	31967	YFPwt_YFPm3	0
YGL105W	Uninduced	6.10575	31967	YFPwt_YFPm3	0
YGL105W	Uninduced	1.05412	31967	YFPwt_YFPm3	0
YGL105W	Uninduced	1.04671	31967	YFPwt_YFPm3	0
YGL105W	Uninduced	1.0078	31967	YFPwt_YFPm3	0
YGL105W	Uninduced	0.962742	31967	YFPwt_YFPm3	0
YGL105W	Uninduced	0.927558	31967	YFPwt_YFPm3	0
YGL105W	Uninduced	0.720046	31967	YFPwt_YFPm3	0
YGL105W	Uninduced	0.673491	31967	YFPwt_YFPm3	0
YGL106W	Uninduced	0.983478	31967	YFPwt_YFPm3	0
YGL106W	Uninduced	0.856238	31967	YFPwt_YFPm3	0
YGL106W	Uninduced	0.83605	31967	YFPwt_YFPm3	0
YGL107C	Uninduced	0.835073	31967	YFPwt_YFPm3	0
YGL111W	Uninduced	1.05024	31967	YFPwt_YFPm3	0
YGL115W	Uninduced	1.01795	31967	YFPwt_YFPm3	0
YGL120C	Uninduced	0.622471	31967	YFPwt_YFPm3	0
YGL123W	Uninduced	1.28472	31967	YFPwt_YFPm3	0
YGL123W	Uninduced	1.0519	31967	YFPwt_YFPm3	0
YGL123W	Uninduced	1.04021	31967	YFPwt_YFPm3	0
YGL123W	Uninduced	1.00867	31967	YFPwt_YFPm3	0
YGL123W	Uninduced	0.900901	31967	YFPwt_YFPm3	0
YGL135W;YPL220W	Uninduced	1.28687	31967	YFPwt_YFPm3	0
YGL135W;YPL220W	Uninduced	1.06526	31967	YFPwt_YFPm3	0
YGL135W;YPL220W	Uninduced	1.02387	31967	YFPwt_YFPm3	0
YGL135W;YPL220W	Uninduced	0.920726	31967	YFPwt_YFPm3	0
YGL135W;YPL220W	Uninduced	0.886446	31967	YFPwt_YFPm3	0
YGL137W	Uninduced	1.50591	31967	YFPwt_YFPm3	0
YGL137W	Uninduced	1.09825	31967	YFPwt_YFPm3	0
YGL137W	Uninduced	0.931099	31967	YFPwt_YFPm3	0
YGL137W	Uninduced	0.88129	31967	YFPwt_YFPm3	0
YGL147C	Uninduced	0.704077	31967	YFPwt_YFPm3	0
YGL147C;YNL067W	Uninduced	1.04145	31967	YFPwt_YFPm3	0
YGL147C;YNL067W	Uninduced	1.04082	31967	YFPwt_YFPm3	0
YGL147C;YNL067W	Uninduced	1.00454	31967	YFPwt_YFPm3	0
YGL147C;YNL067W	Uninduced	0.998901	31967	YFPwt_YFPm3	0
YGL147C;YNL067W	Uninduced	0.992063	31967	YFPwt_YFPm3	0
YGL147C;YNL067W	Uninduced	0.979816	31967	YFPwt_YFPm3	0
YGL147C;YNL067W	Uninduced	0.927128	31967	YFPwt_YFPm3	0
YGL147C;YNL067W	Uninduced	0.873439	31967	YFPwt_YFPm3	0
YGL147C;YNL067W	Uninduced	0.864678	31967	YFPwt_YFPm3	0
YGL147C;YNL067W	Uninduced	0.671186	31967	YFPwt_YFPm3	0
YGL148W	Uninduced	1.18844	31967	YFPwt_YFPm3	0
YGL148W	Uninduced	1.03134	31967	YFPwt_YFPm3	0
YGL148W	Uninduced	1.02159	31967	YFPwt_YFPm3	0
YGL148W	Uninduced	1.01102	31967	YFPwt_YFPm3	0
YGL148W	Uninduced	0.940557	31967	YFPwt_YFPm3	0
YGL148W	Uninduced	0.853315	31967	YFPwt_YFPm3	0
YGL150C	Uninduced	0.85492	31967	YFPwt_YFPm3	0
YGL173C	Uninduced	1.39187	31967	YFPwt_YFPm3	0
YGL173C	Uninduced	1.27575	31967	YFPwt_YFPm3	0
YGL173C	Uninduced	1.15092	31967	YFPwt_YFPm3	0
YGL173C	Uninduced	0.987557	31967	YFPwt_YFPm3	0
YGL173C	Uninduced	0.979336	31967	YFPwt_YFPm3	0
YGL173C	Uninduced	0.92285	31967	YFPwt_YFPm3	0
YGL173C	Uninduced	0.919456	31967	YFPwt_YFPm3	0
YGL173C	Uninduced	0.890234	31967	YFPwt_YFPm3	0
YGL173C	Uninduced	0.885975	31967	YFPwt_YFPm3	0
YGL173C	Uninduced	0.862515	31967	YFPwt_YFPm3	0
YGL180W	Uninduced	1.18987	31967	YFPwt_YFPm3	0
YGL187C	Uninduced	1.25382	31967	YFPwt_YFPm3	0
YGL195W	Uninduced	2.00747	31967	YFPwt_YFPm3	0
YGL195W	Uninduced	1.18802	31967	YFPwt_YFPm3	0
YGL195W	Uninduced	1.09154	31967	YFPwt_YFPm3	0
YGL195W	Uninduced	1.05987	31967	YFPwt_YFPm3	0
YGL195W	Uninduced	1.03785	31967	YFPwt_YFPm3	0
YGL195W	Uninduced	0.939232	31967	YFPwt_YFPm3	0
YGL195W	Uninduced	0.912409	31967	YFPwt_YFPm3	0
YGL195W	Uninduced	0.755116	31967	YFPwt_YFPm3	0
YGL195W	Uninduced	0.745212	31967	YFPwt_YFPm3	0
YGL195W	Uninduced	0.723903	31967	YFPwt_YFPm3	0
YGL195W	Uninduced	0.607903	31967	YFPwt_YFPm3	0
YGL200C	Uninduced	3.18107	31967	YFPwt_YFPm3	0
YGL200C	Uninduced	1.5949	31967	YFPwt_YFPm3	0
YGL202W	Uninduced	1.21046	31967	YFPwt_YFPm3	0
YGL202W	Uninduced	0.97012	31967	YFPwt_YFPm3	0
YGL202W	Uninduced	0.942596	31967	YFPwt_YFPm3	0
YGL202W	Uninduced	0.906125	31967	YFPwt_YFPm3	0
YGL206C	Uninduced	1.58351	31967	YFPwt_YFPm3	0
YGL206C	Uninduced	1.04444	31967	YFPwt_YFPm3	0
YGL206C	Uninduced	1.03159	31967	YFPwt_YFPm3	0
YGL206C	Uninduced	0.969086	31967	YFPwt_YFPm3	0
YGL206C	Uninduced	0.944198	31967	YFPwt_YFPm3	0
YGL206C	Uninduced	0.873439	31967	YFPwt_YFPm3	0
YGL207W	Uninduced	0.968242	31967	YFPwt_YFPm3	0
YGL207W	Uninduced	0.616523	31967	YFPwt_YFPm3	0
YGL220W	Uninduced	1.01992	31967	YFPwt_YFPm3	0
YGL231C	Uninduced	1.14787	31967	YFPwt_YFPm3	0
YGL232W	Uninduced	0.566316	31967	YFPwt_YFPm3	0
YGL234W	Uninduced	0.879662	31967	YFPwt_YFPm3	0
YGL234W	Uninduced	0.838785	31967	YFPwt_YFPm3	0
YGL238W	Uninduced	1.89555	31967	YFPwt_YFPm3	0
YGL245W	Uninduced	1.56289	31967	YFPwt_YFPm3	0
YGL245W	Uninduced	1.38288	31967	YFPwt_YFPm3	0
YGL245W	Uninduced	1.29458	31967	YFPwt_YFPm3	0
YGL245W	Uninduced	1.07241	31967	YFPwt_YFPm3	0
YGL245W	Uninduced	1.0085	31967	YFPwt_YFPm3	0
YGL245W	Uninduced	1.00342	31967	YFPwt_YFPm3	0
YGL245W	Uninduced	0.966557	31967	YFPwt_YFPm3	0
YGL245W	Uninduced	0.934929	31967	YFPwt_YFPm3	0
YGL245W	Uninduced	0.91391	31967	YFPwt_YFPm3	0
YGL245W	Uninduced	0.863931	31967	YFPwt_YFPm3	0
YGL245W	Uninduced	0.80032	31967	YFPwt_YFPm3	0
YGL245W	Uninduced	0.623908	31967	YFPwt_YFPm3	0
YGL245W	Uninduced	0.606907	31967	YFPwt_YFPm3	0
YGL253W	Uninduced	3.02133	31967	YFPwt_YFPm3	0
YGL253W	Uninduced	1.22085	31967	YFPwt_YFPm3	0
YGL253W	Uninduced	1.2051	31967	YFPwt_YFPm3	0
YGL253W	Uninduced	1.16557	31967	YFPwt_YFPm3	0
YGL253W	Uninduced	1.07969	31967	YFPwt_YFPm3	0
YGL253W	Uninduced	1.05481	31967	YFPwt_YFPm3	0
YGL253W	Uninduced	1.05199	31967	YFPwt_YFPm3	0
YGL253W	Uninduced	1.01347	31967	YFPwt_YFPm3	0
YGL253W	Uninduced	1.00054	31967	YFPwt_YFPm3	0
YGL253W	Uninduced	0.856311	31967	YFPwt_YFPm3	0
YGL253W	Uninduced	0.5	31967	YFPwt_YFPm3	0
YGR005C	Uninduced	0.0184556	31967	YFPwt_YFPm3	0
YGR008C	Uninduced	2.22202	31967	YFPwt_YFPm3	0
YGR020C	Uninduced	2.97983	31967	YFPwt_YFPm3	0
YGR026W	Uninduced	0.771605	31967	YFPwt_YFPm3	0
YGR034W	Uninduced	1.21705	31967	YFPwt_YFPm3	0
YGR034W	Uninduced	0.97012	31967	YFPwt_YFPm3	0
YGR034W;YLR344W	Uninduced	1.76224	31967	YFPwt_YFPm3	0
YGR034W;YLR344W	Uninduced	1.04158	31967	YFPwt_YFPm3	0
YGR034W;YLR344W	Uninduced	0.9995	31967	YFPwt_YFPm3	0
YGR034W;YLR344W	Uninduced	0.992556	31967	YFPwt_YFPm3	0
YGR034W;YLR344W	Uninduced	0.979336	31967	YFPwt_YFPm3	0
YGR037C	Uninduced	1.34814	31967	YFPwt_YFPm3	0
YGR037C	Uninduced	1.15072	31967	YFPwt_YFPm3	0
YGR037C	Uninduced	1.1069	31967	YFPwt_YFPm3	0
YGR037C	Uninduced	1.0863	31967	YFPwt_YFPm3	0
YGR037C	Uninduced	0.973236	31967	YFPwt_YFPm3	0
YGR037C	Uninduced	0.945895	31967	YFPwt_YFPm3	0
YGR037C	Uninduced	0.923361	31967	YFPwt_YFPm3	0
YGR037C	Uninduced	0.918949	31967	YFPwt_YFPm3	0
YGR054W	Uninduced	1.14948	31967	YFPwt_YFPm3	0
YGR054W	Uninduced	1.12684	31967	YFPwt_YFPm3	0
YGR061C	Uninduced	1.2061	31967	YFPwt_YFPm3	0
YGR061C	Uninduced	1.18015	31967	YFPwt_YFPm3	0
YGR061C	Uninduced	1.14102	31967	YFPwt_YFPm3	0
YGR061C	Uninduced	1.1359	31967	YFPwt_YFPm3	0
YGR061C	Uninduced	1.12459	31967	YFPwt_YFPm3	0
YGR061C	Uninduced	1.0328	31967	YFPwt_YFPm3	0
YGR061C	Uninduced	1.03196	31967	YFPwt_YFPm3	0
YGR061C	Uninduced	1.02529	31967	YFPwt_YFPm3	0
YGR061C	Uninduced	0.896218	31967	YFPwt_YFPm3	0
YGR061C	Uninduced	0.858222	31967	YFPwt_YFPm3	0
YGR061C	Uninduced	0.485602	31967	YFPwt_YFPm3	0
YGR068C	Uninduced	1.35689	31967	YFPwt_YFPm3	0
YGR078C	Uninduced	0.996413	31967	YFPwt_YFPm3	0
YGR080W	Uninduced	0.806582	31967	YFPwt_YFPm3	0
YGR085C;YPR102C	Uninduced	1.71338	31967	YFPwt_YFPm3	0
YGR085C;YPR102C	Uninduced	1.28846	31967	YFPwt_YFPm3	0
YGR085C;YPR102C	Uninduced	1.16209	31967	YFPwt_YFPm3	0
YGR085C;YPR102C	Uninduced	1.14365	31967	YFPwt_YFPm3	0
YGR085C;YPR102C	Uninduced	1.07408	31967	YFPwt_YFPm3	0
YGR085C;YPR102C	Uninduced	1.01884	31967	YFPwt_YFPm3	0
YGR085C;YPR102C	Uninduced	1.01551	31967	YFPwt_YFPm3	0
YGR085C;YPR102C	Uninduced	0.991572	31967	YFPwt_YFPm3	0
YGR085C;YPR102C	Uninduced	0.927042	31967	YFPwt_YFPm3	0
YGR085C;YPR102C	Uninduced	0.885583	31967	YFPwt_YFPm3	0
YGR085C;YPR102C	Uninduced	0.72812	31967	YFPwt_YFPm3	0
YGR085C;YPR102C	Uninduced	0.591611	31967	YFPwt_YFPm3	0
YGR086C	Uninduced	2.73105	31967	YFPwt_YFPm3	0
YGR086C	Uninduced	1.11284	31967	YFPwt_YFPm3	0
YGR086C	Uninduced	1.05774	31967	YFPwt_YFPm3	0
YGR086C	Uninduced	0.917179	31967	YFPwt_YFPm3	0
YGR086C	Uninduced	0.898311	31967	YFPwt_YFPm3	0
YGR087C	Uninduced	1.05426	31967	YFPwt_YFPm3	0
YGR090W	Uninduced	65.368	31967	YFPwt_YFPm3	0
YGR094W	Uninduced	1.70949	31967	YFPwt_YFPm3	0
YGR094W	Uninduced	1.6452	31967	YFPwt_YFPm3	0
YGR094W	Uninduced	1.38529	31967	YFPwt_YFPm3	0
YGR094W	Uninduced	1.37389	31967	YFPwt_YFPm3	0
YGR094W	Uninduced	1.25857	31967	YFPwt_YFPm3	0
YGR094W	Uninduced	1.09996	31967	YFPwt_YFPm3	0
YGR094W	Uninduced	1.03203	31967	YFPwt_YFPm3	0
YGR094W	Uninduced	1.0284	31967	YFPwt_YFPm3	0
YGR094W	Uninduced	1.00919	31967	YFPwt_YFPm3	0
YGR094W	Uninduced	0.989805	31967	YFPwt_YFPm3	0
YGR094W	Uninduced	0.976753	31967	YFPwt_YFPm3	0
YGR094W	Uninduced	0.968898	31967	YFPwt_YFPm3	0
YGR094W	Uninduced	0.962927	31967	YFPwt_YFPm3	0
YGR094W	Uninduced	0.91617	31967	YFPwt_YFPm3	0
YGR094W	Uninduced	0.640697	31967	YFPwt_YFPm3	0
YGR103W	Uninduced	0.925497	31967	YFPwt_YFPm3	0
YGR103W	Uninduced	0.895335	31967	YFPwt_YFPm3	0
YGR103W	Uninduced	0.812414	31967	YFPwt_YFPm3	0
YGR116W	Uninduced	1.1639	31967	YFPwt_YFPm3	0
YGR116W	Uninduced	0.657289	31967	YFPwt_YFPm3	0
YGR118W;YPR132W	Uninduced	5.32141	31967	YFPwt_YFPm3	0
YGR118W;YPR132W	Uninduced	1.13935	31967	YFPwt_YFPm3	0
YGR118W;YPR132W	Uninduced	0.991473	31967	YFPwt_YFPm3	0
YGR118W;YPR132W	Uninduced	0.975229	31967	YFPwt_YFPm3	0
YGR118W;YPR132W	Uninduced	0.855432	31967	YFPwt_YFPm3	0
YGR118W;YPR132W	Uninduced	0.790764	31967	YFPwt_YFPm3	0
YGR119C	Uninduced	1.00566	31967	YFPwt_YFPm3	0
YGR123C	Uninduced	1.09287	31967	YFPwt_YFPm3	0
YGR123C	Uninduced	0.798403	31967	YFPwt_YFPm3	0
YGR123C	Uninduced	0.0840548	31967	YFPwt_YFPm3	0
YGR124W	Uninduced	1.04858	31967	YFPwt_YFPm3	0
YGR124W	Uninduced	1.04148	31967	YFPwt_YFPm3	0
YGR124W	Uninduced	0.972857	31967	YFPwt_YFPm3	0
YGR124W	Uninduced	0.903098	31967	YFPwt_YFPm3	0
YGR124W	Uninduced	0.893735	31967	YFPwt_YFPm3	0
YGR124W	Uninduced	0.835492	31967	YFPwt_YFPm3	0
YGR128C	Uninduced	0.431854	31967	YFPwt_YFPm3	0
YGR132C	Uninduced	2.15248	31967	YFPwt_YFPm3	0
YGR132C	Uninduced	1.29002	31967	YFPwt_YFPm3	0
YGR135W	Uninduced	0.795862	31967	YFPwt_YFPm3	0
YGR136W	Uninduced	0.939144	31967	YFPwt_YFPm3	0
YGR136W	Uninduced	0.866401	31967	YFPwt_YFPm3	0
YGR148C;YGL031C	Uninduced	1.07252	31967	YFPwt_YFPm3	0
YGR148C;YGL031C	Uninduced	1.04565	31967	YFPwt_YFPm3	0
YGR148C;YGL031C	Uninduced	0.961076	31967	YFPwt_YFPm3	0
YGR148C;YGL031C	Uninduced	0.833542	31967	YFPwt_YFPm3	0
YGR155W	Uninduced	1.33113	31967	YFPwt_YFPm3	0
YGR155W	Uninduced	1.18004	31967	YFPwt_YFPm3	0
YGR155W	Uninduced	1.13737	31967	YFPwt_YFPm3	0
YGR155W	Uninduced	1.00234	31967	YFPwt_YFPm3	0
YGR155W	Uninduced	0.983574	31967	YFPwt_YFPm3	0
YGR155W	Uninduced	0.937207	31967	YFPwt_YFPm3	0
YGR155W	Uninduced	0.927988	31967	YFPwt_YFPm3	0
YGR155W	Uninduced	0.845237	31967	YFPwt_YFPm3	0
YGR157W	Uninduced	2.56253	31967	YFPwt_YFPm3	0
YGR159C	Uninduced	0.956663	31967	YFPwt_YFPm3	0
YGR159C	Uninduced	0.937734	31967	YFPwt_YFPm3	0
YGR159C	Uninduced	0.831878	31967	YFPwt_YFPm3	0
YGR162W	Uninduced	1.02197	31967	YFPwt_YFPm3	0
YGR162W	Uninduced	0.990982	31967	YFPwt_YFPm3	0
YGR162W	Uninduced	0.86423	31967	YFPwt_YFPm3	0
YGR162W	Uninduced	0.481278	31967	YFPwt_YFPm3	0
YGR165W	Uninduced	0.903751	31967	YFPwt_YFPm3	0
YGR167W	Uninduced	1.2659	31967	YFPwt_YFPm3	0
YGR167W	Uninduced	1.039	31967	YFPwt_YFPm3	0
YGR167W	Uninduced	1.02403	31967	YFPwt_YFPm3	0
YGR173W	Uninduced	0.887154	31967	YFPwt_YFPm3	0
YGR178C	Uninduced	1.94156	31967	YFPwt_YFPm3	0
YGR178C	Uninduced	1.24468	31967	YFPwt_YFPm3	0
YGR178C	Uninduced	0.971345	31967	YFPwt_YFPm3	0
YGR179C	Uninduced	1.03708	31967	YFPwt_YFPm3	0
YGR180C	Uninduced	1.1313	31967	YFPwt_YFPm3	0
YGR180C	Uninduced	1.05326	31967	YFPwt_YFPm3	0
YGR180C	Uninduced	1.00925	31967	YFPwt_YFPm3	0
YGR180C	Uninduced	0.950751	31967	YFPwt_YFPm3	0
YGR180C	Uninduced	0.946432	31967	YFPwt_YFPm3	0
YGR180C	Uninduced	0.769112	31967	YFPwt_YFPm3	0
YGR180C	Uninduced	0.608902	31967	YFPwt_YFPm3	0
YGR185C	Uninduced	1.1843	31967	YFPwt_YFPm3	0
YGR185C	Uninduced	1.02085	31967	YFPwt_YFPm3	0
YGR185C	Uninduced	0.998403	31967	YFPwt_YFPm3	0
YGR185C	Uninduced	0.552853	31967	YFPwt_YFPm3	0
YGR186W	Uninduced	19.1095	31967	YFPwt_YFPm3	0
YGR192C	Uninduced	1.07909	31967	YFPwt_YFPm3	0
YGR192C	Uninduced	1.05264	31967	YFPwt_YFPm3	0
YGR192C	Uninduced	0.996612	31967	YFPwt_YFPm3	0
YGR192C	Uninduced	0.987069	31967	YFPwt_YFPm3	0
YGR192C	Uninduced	0.965437	31967	YFPwt_YFPm3	0
YGR192C;YJL052W;YJR009C	Uninduced	1.09074	31967	YFPwt_YFPm3	0
YGR192C;YJL052W;YJR009C	Uninduced	1.0119	31967	YFPwt_YFPm3	0
YGR192C;YJL052W;YJR009C	Uninduced	1.00833	31967	YFPwt_YFPm3	0
YGR192C;YJL052W;YJR009C	Uninduced	1.00263	31967	YFPwt_YFPm3	0
YGR192C;YJL052W;YJR009C	Uninduced	0.952018	31967	YFPwt_YFPm3	0
YGR192C;YJL052W;YJR009C	Uninduced	0.866101	31967	YFPwt_YFPm3	0
YGR192C;YJR009C	Uninduced	9.70403	31967	YFPwt_YFPm3	0
YGR192C;YJR009C	Uninduced	7.43826	31967	YFPwt_YFPm3	0
YGR192C;YJR009C	Uninduced	5.22139	31967	YFPwt_YFPm3	0
YGR192C;YJR009C	Uninduced	1.40125	31967	YFPwt_YFPm3	0
YGR192C;YJR009C	Uninduced	1.00882	31967	YFPwt_YFPm3	0
YGR192C;YJR009C	Uninduced	1.00563	31967	YFPwt_YFPm3	0
YGR192C;YJR009C	Uninduced	1.00373	31967	YFPwt_YFPm3	0
YGR192C;YJR009C	Uninduced	1.00007	31967	YFPwt_YFPm3	0
YGR192C;YJR009C	Uninduced	0.941886	31967	YFPwt_YFPm3	0
YGR193C	Uninduced	0.785793	31967	YFPwt_YFPm3	0
YGR200C	Uninduced	0.587337	31967	YFPwt_YFPm3	0
YGR202C	Uninduced	0.910996	31967	YFPwt_YFPm3	0
YGR204W	Uninduced	1.66697	31967	YFPwt_YFPm3	0
YGR204W	Uninduced	1.37648	31967	YFPwt_YFPm3	0
YGR204W	Uninduced	1.12656	31967	YFPwt_YFPm3	0
YGR204W	Uninduced	1.03174	31967	YFPwt_YFPm3	0
YGR204W	Uninduced	0.856238	31967	YFPwt_YFPm3	0
YGR204W	Uninduced	0.833125	31967	YFPwt_YFPm3	0
YGR204W	Uninduced	0.814996	31967	YFPwt_YFPm3	0
YGR204W	Uninduced	0.388531	31967	YFPwt_YFPm3	0
YGR204W	Uninduced	0.161428	31967	YFPwt_YFPm3	0
YGR204W	Uninduced	0.0940115	31967	YFPwt_YFPm3	0
YGR207C	Uninduced	1.45212	31967	YFPwt_YFPm3	0
YGR207C	Uninduced	1.18467	31967	YFPwt_YFPm3	0
YGR207C	Uninduced	1.10233	31967	YFPwt_YFPm3	0
YGR207C	Uninduced	1.01066	31967	YFPwt_YFPm3	0
YGR207C	Uninduced	0.738498	31967	YFPwt_YFPm3	0
YGR208W	Uninduced	1.13276	31967	YFPwt_YFPm3	0
YGR208W	Uninduced	1.07335	31967	YFPwt_YFPm3	0
YGR209C	Uninduced	1.67297	31967	YFPwt_YFPm3	0
YGR209C	Uninduced	1.18975	31967	YFPwt_YFPm3	0
YGR209C	Uninduced	1.11186	31967	YFPwt_YFPm3	0
YGR209C	Uninduced	0.962186	31967	YFPwt_YFPm3	0
YGR209C	Uninduced	0.961908	31967	YFPwt_YFPm3	0
YGR209C	Uninduced	0.942329	31967	YFPwt_YFPm3	0
YGR209C	Uninduced	0.877424	31967	YFPwt_YFPm3	0
YGR209C	Uninduced	0.553925	31967	YFPwt_YFPm3	0
YGR211W	Uninduced	1.40469	31967	YFPwt_YFPm3	0
YGR211W	Uninduced	0.938703	31967	YFPwt_YFPm3	0
YGR211W	Uninduced	0.850196	31967	YFPwt_YFPm3	0
YGR214W	Uninduced	1.18943	31967	YFPwt_YFPm3	0
YGR214W	Uninduced	1.01678	31967	YFPwt_YFPm3	0
YGR214W;YLR048W	Uninduced	0.976086	31967	YFPwt_YFPm3	0
YGR229C	Uninduced	1.10441	31967	YFPwt_YFPm3	0
YGR229C	Uninduced	0.917179	31967	YFPwt_YFPm3	0
YGR229C	Uninduced	0.622975	31967	YFPwt_YFPm3	0
YGR234W	Uninduced	1.16425	31967	YFPwt_YFPm3	0
YGR234W	Uninduced	1.14892	31967	YFPwt_YFPm3	0
YGR234W	Uninduced	1.01185	31967	YFPwt_YFPm3	0
YGR234W	Uninduced	0.972195	31967	YFPwt_YFPm3	0
YGR234W	Uninduced	0.954198	31967	YFPwt_YFPm3	0
YGR240C	Uninduced	1.30734	31967	YFPwt_YFPm3	0
YGR240C	Uninduced	1.26674	31967	YFPwt_YFPm3	0
YGR240C	Uninduced	1.23542	31967	YFPwt_YFPm3	0
YGR240C	Uninduced	1.13983	31967	YFPwt_YFPm3	0
YGR240C	Uninduced	1.10593	31967	YFPwt_YFPm3	0
YGR240C	Uninduced	1.07425	31967	YFPwt_YFPm3	0
YGR240C	Uninduced	1.06346	31967	YFPwt_YFPm3	0
YGR240C	Uninduced	1.05112	31967	YFPwt_YFPm3	0
YGR240C	Uninduced	1.04675	31967	YFPwt_YFPm3	0
YGR240C	Uninduced	1.03728	31967	YFPwt_YFPm3	0
YGR240C	Uninduced	1.00298	31967	YFPwt_YFPm3	0
YGR240C	Uninduced	0.98464	31967	YFPwt_YFPm3	0
YGR240C	Uninduced	0.974564	31967	YFPwt_YFPm3	0
YGR240C	Uninduced	0.967492	31967	YFPwt_YFPm3	0
YGR240C	Uninduced	0.954745	31967	YFPwt_YFPm3	0
YGR240C	Uninduced	0.94509	31967	YFPwt_YFPm3	0
YGR240C	Uninduced	0.90009	31967	YFPwt_YFPm3	0
YGR240C	Uninduced	0.703433	31967	YFPwt_YFPm3	0
YGR244C	Uninduced	1.4214	31967	YFPwt_YFPm3	0
YGR244C	Uninduced	1.14683	31967	YFPwt_YFPm3	0
YGR244C	Uninduced	1.12134	31967	YFPwt_YFPm3	0
YGR244C	Uninduced	0.889205	31967	YFPwt_YFPm3	0
YGR244C	Uninduced	0.788271	31967	YFPwt_YFPm3	0
YGR253C	Uninduced	1.8424	31967	YFPwt_YFPm3	0
YGR253C	Uninduced	1.2997	31967	YFPwt_YFPm3	0
YGR253C	Uninduced	1.0504	31967	YFPwt_YFPm3	0
YGR253C	Uninduced	0.754774	31967	YFPwt_YFPm3	0
YGR254W	Uninduced	2.41774	31967	YFPwt_YFPm3	0
YGR254W	Uninduced	1.03177	31967	YFPwt_YFPm3	0
YGR254W	Uninduced	1.01606	31967	YFPwt_YFPm3	0
YGR254W;YHR174W	Uninduced	1.22932	31967	YFPwt_YFPm3	0
YGR254W;YHR174W	Uninduced	1.03744	31967	YFPwt_YFPm3	0
YGR254W;YHR174W	Uninduced	1.0027	31967	YFPwt_YFPm3	0
YGR254W;YHR174W	Uninduced	0.997904	31967	YFPwt_YFPm3	0
YGR264C	Uninduced	1.37648	31967	YFPwt_YFPm3	0
YGR264C	Uninduced	1.25967	31967	YFPwt_YFPm3	0
YGR264C	Uninduced	1.13715	31967	YFPwt_YFPm3	0
YGR264C	Uninduced	1.01183	31967	YFPwt_YFPm3	0
YGR264C	Uninduced	1.00022	31967	YFPwt_YFPm3	0
YGR264C	Uninduced	0.987557	31967	YFPwt_YFPm3	0
YGR264C	Uninduced	0.960984	31967	YFPwt_YFPm3	0
YGR264C	Uninduced	0.94304	31967	YFPwt_YFPm3	0
YGR264C	Uninduced	0.925326	31967	YFPwt_YFPm3	0
YGR264C	Uninduced	0.923361	31967	YFPwt_YFPm3	0
YGR264C	Uninduced	0.90843	31967	YFPwt_YFPm3	0
YGR264C	Uninduced	0.90082	31967	YFPwt_YFPm3	0
YGR264C	Uninduced	0.847099	31967	YFPwt_YFPm3	0
YGR264C	Uninduced	0.721917	31967	YFPwt_YFPm3	0
YGR270W	Uninduced	1.23867	31967	YFPwt_YFPm3	0
YGR279C	Uninduced	0.913993	31967	YFPwt_YFPm3	0
YGR279C	Uninduced	0.89815	31967	YFPwt_YFPm3	0
YGR282C	Uninduced	0.847314	31967	YFPwt_YFPm3	0
YGR282C	Uninduced	0.590423	31967	YFPwt_YFPm3	0
YGR285C	Uninduced	1.84529	31967	YFPwt_YFPm3	0
YGR285C	Uninduced	1.72221	31967	YFPwt_YFPm3	0
YGR285C	Uninduced	1.28581	31967	YFPwt_YFPm3	0
YGR285C	Uninduced	1.27473	31967	YFPwt_YFPm3	0
YGR285C	Uninduced	1.14691	31967	YFPwt_YFPm3	0
YGR285C	Uninduced	1.06088	31967	YFPwt_YFPm3	0
YGR285C	Uninduced	0.962001	31967	YFPwt_YFPm3	0
YGR285C	Uninduced	0.9522	31967	YFPwt_YFPm3	0
YGR285C	Uninduced	0.948407	31967	YFPwt_YFPm3	0
YGR285C	Uninduced	0.934754	31967	YFPwt_YFPm3	0
YGR285C	Uninduced	0.83668	31967	YFPwt_YFPm3	0
YHL001W	Uninduced	1.05652	31967	YFPwt_YFPm3	0
YHL001W	Uninduced	0.958313	31967	YFPwt_YFPm3	0
YHL001W;YKL006W	Uninduced	1.44346	31967	YFPwt_YFPm3	0
YHL001W;YKL006W	Uninduced	1.05436	31967	YFPwt_YFPm3	0
YHL001W;YKL006W	Uninduced	0.914578	31967	YFPwt_YFPm3	0
YHL011C	Uninduced	0.923873	31967	YFPwt_YFPm3	0
YHL011C	Uninduced	0.649646	31967	YFPwt_YFPm3	0
YHL015W	Uninduced	1.24617	31967	YFPwt_YFPm3	0
YHL015W	Uninduced	1.10252	31967	YFPwt_YFPm3	0
YHL015W	Uninduced	1.06586	31967	YFPwt_YFPm3	0
YHL015W	Uninduced	0.998004	31967	YFPwt_YFPm3	0
YHL015W	Uninduced	0.99681	31967	YFPwt_YFPm3	0
YHL015W	Uninduced	0.891107	31967	YFPwt_YFPm3	0
YHL015W	Uninduced	0.845094	31967	YFPwt_YFPm3	0
YHL030W	Uninduced	1.54911	31967	YFPwt_YFPm3	0
YHL033C	Uninduced	1.69262	31967	YFPwt_YFPm3	0
YHL033C	Uninduced	1.08639	31967	YFPwt_YFPm3	0
YHL033C;YLL045C	Uninduced	2.28592	31967	YFPwt_YFPm3	0
YHL033C;YLL045C	Uninduced	1.05785	31967	YFPwt_YFPm3	0
YHL033C;YLL045C	Uninduced	1.05753	31967	YFPwt_YFPm3	0
YHL033C;YLL045C	Uninduced	1.0392	31967	YFPwt_YFPm3	0
YHL033C;YLL045C	Uninduced	1.01572	31967	YFPwt_YFPm3	0
YHL033C;YLL045C	Uninduced	0.965065	31967	YFPwt_YFPm3	0
YHL034C	Uninduced	1.24667	31967	YFPwt_YFPm3	0
YHL034C	Uninduced	0.516236	31967	YFPwt_YFPm3	0
YHR005C-A	Uninduced	1.17044	31967	YFPwt_YFPm3	0
YHR005C-A	Uninduced	0.942241	31967	YFPwt_YFPm3	0
YHR007C	Uninduced	1.27742	31967	YFPwt_YFPm3	0
YHR007C	Uninduced	1.01684	31967	YFPwt_YFPm3	0
YHR007C	Uninduced	0.821828	31967	YFPwt_YFPm3	0
YHR008C	Uninduced	1.097	31967	YFPwt_YFPm3	0
YHR008C	Uninduced	1.04881	31967	YFPwt_YFPm3	0
YHR008C	Uninduced	1.02023	31967	YFPwt_YFPm3	0
YHR008C	Uninduced	0.990884	31967	YFPwt_YFPm3	0
YHR008C	Uninduced	0.966651	31967	YFPwt_YFPm3	0
YHR008C	Uninduced	0.959049	31967	YFPwt_YFPm3	0
YHR008C	Uninduced	0.780031	31967	YFPwt_YFPm3	0
YHR009C	Uninduced	1.16459	31967	YFPwt_YFPm3	0
YHR010W	Uninduced	0.880437	31967	YFPwt_YFPm3	0
YHR010W	Uninduced	0.872829	31967	YFPwt_YFPm3	0
YHR010W;YDR471W	Uninduced	1.16353	31967	YFPwt_YFPm3	0
YHR018C	Uninduced	0.953562	31967	YFPwt_YFPm3	0
YHR019C	Uninduced	1.21705	31967	YFPwt_YFPm3	0
YHR019C	Uninduced	1.1656	31967	YFPwt_YFPm3	0
YHR019C	Uninduced	1.07756	31967	YFPwt_YFPm3	0
YHR019C	Uninduced	1.05939	31967	YFPwt_YFPm3	0
YHR019C	Uninduced	1.01814	31967	YFPwt_YFPm3	0
YHR019C	Uninduced	0.967867	31967	YFPwt_YFPm3	0
YHR019C	Uninduced	0.875427	31967	YFPwt_YFPm3	0
YHR019C	Uninduced	0.183147	31967	YFPwt_YFPm3	0
YHR020W	Uninduced	1.91395	31967	YFPwt_YFPm3	0
YHR020W	Uninduced	1.37588	31967	YFPwt_YFPm3	0
YHR020W	Uninduced	1.35779	31967	YFPwt_YFPm3	0
YHR020W	Uninduced	1.15164	31967	YFPwt_YFPm3	0
YHR020W	Uninduced	1.13159	31967	YFPwt_YFPm3	0
YHR020W	Uninduced	1.05008	31967	YFPwt_YFPm3	0
YHR020W	Uninduced	0.990589	31967	YFPwt_YFPm3	0
YHR020W	Uninduced	0.975705	31967	YFPwt_YFPm3	0
YHR020W	Uninduced	0.950841	31967	YFPwt_YFPm3	0
YHR020W	Uninduced	0.917684	31967	YFPwt_YFPm3	0
YHR020W	Uninduced	0.843526	31967	YFPwt_YFPm3	0
YHR020W	Uninduced	0.584727	31967	YFPwt_YFPm3	0
YHR021C;YKL156W	Uninduced	1.05249	31967	YFPwt_YFPm3	0
YHR021C;YKL156W	Uninduced	1.01957	31967	YFPwt_YFPm3	0
YHR025W	Uninduced	1.09623	31967	YFPwt_YFPm3	0
YHR025W	Uninduced	0.978474	31967	YFPwt_YFPm3	0
YHR027C	Uninduced	1.49038	31967	YFPwt_YFPm3	0
YHR027C	Uninduced	0.913325	31967	YFPwt_YFPm3	0
YHR027C	Uninduced	0.907194	31967	YFPwt_YFPm3	0
YHR027C	Uninduced	0.714898	31967	YFPwt_YFPm3	0
YHR028C	Uninduced	0.98824	31967	YFPwt_YFPm3	0
YHR037W	Uninduced	0.911411	31967	YFPwt_YFPm3	0
YHR039C	Uninduced	1.35148	31967	YFPwt_YFPm3	0
YHR039C-A	Uninduced	2.4567	31967	YFPwt_YFPm3	0
YHR039C-A	Uninduced	1.00766	31967	YFPwt_YFPm3	0
YHR042W	Uninduced	0.771724	31967	YFPwt_YFPm3	0
YHR047C	Uninduced	9.50209	31967	YFPwt_YFPm3	0
YHR047C	Uninduced	0.987069	31967	YFPwt_YFPm3	0
YHR047C	Uninduced	0.895095	31967	YFPwt_YFPm3	0
YHR047C	Uninduced	0.623675	31967	YFPwt_YFPm3	0
YHR049W	Uninduced	1.59683	31967	YFPwt_YFPm3	0
YHR049W	Uninduced	1.03949	31967	YFPwt_YFPm3	0
YHR049W	Uninduced	0.904977	31967	YFPwt_YFPm3	0
YHR051W	Uninduced	0.864603	31967	YFPwt_YFPm3	0
YHR051W	Uninduced	0.429812	31967	YFPwt_YFPm3	0
YHR052W	Uninduced	1.00378	31967	YFPwt_YFPm3	0
YHR052W	Uninduced	0.981547	31967	YFPwt_YFPm3	0
YHR052W	Uninduced	0.87321	31967	YFPwt_YFPm3	0
YHR052W	Uninduced	0.658805	31967	YFPwt_YFPm3	0
YHR064C	Uninduced	1.45734	31967	YFPwt_YFPm3	0
YHR064C	Uninduced	1.32356	31967	YFPwt_YFPm3	0
YHR064C	Uninduced	1.27057	31967	YFPwt_YFPm3	0
YHR064C	Uninduced	1.24827	31967	YFPwt_YFPm3	0
YHR064C	Uninduced	1.1515	31967	YFPwt_YFPm3	0
YHR064C	Uninduced	1.03283	31967	YFPwt_YFPm3	0
YHR064C	Uninduced	1.0031	31967	YFPwt_YFPm3	0
YHR064C	Uninduced	0.989315	31967	YFPwt_YFPm3	0
YHR064C	Uninduced	0.977995	31967	YFPwt_YFPm3	0
YHR064C	Uninduced	0.975895	31967	YFPwt_YFPm3	0
[truncated: 182,895 more rows]
