# Supplementary material for: Quantifying Condition-Dependent Intracellular Protein Levels Enables High-Precision Fitness Estimates
Source: PLoS One. 2013 Sep 25;8(9):e75320. doi: 10.1371/journal.pone.0075320 (PMC3783400; doi:10.1371/journal.pone.0075320)
Supplement: Table S3 — The slopes from our regression of protein abundance on growth rate are larger than those from a previous study in which growth was limited by glucose concentration [6]. Our slopes are adjusted by a correction factor (see supplemental methods) that converts relative to absolute growth rates in order to allow direct comparison with previously obtained slopes [6]. For every protein we display the average number of times its abundance is measured per mass spectrometry experiment (‘ratio_count_mean’), the minimum number of times its abundance is measured per mass spectrometry experiment (‘ratio_count_min’), and the total number of experiments in which its abundance is measured at least 4 times. There are 23 total experiments (6, 4, 4, 7 and 2 for each pair of strains respectively; Table 1 ). (XLSX) [file pone.0075320.s008.xlsx]

## Sheet: Slope_Comparison_RCcutoff4_repe
Protein	Brauer	Geiler	Ratio_Count_Mean	Ratio_Count_Min	Number_of_Experiments (min = 3, max = 23)
YAL005C	-6.69	-94.2337	16.13	5	23
YPL240C	-6.23	-97.1446	6.1	4	20
YPL106C	-2.25	-32.5926	32.65	12	23
YOR027W	-6.55	-62.4328	31.7	9	23
YLL024C	1.34	-57.6824	19.78	8	23
YMR186W	-4.93	-42.4214	14.83	7	23
YLR109W	-4.33	-37.6151	14.55	5	22
YNL036W	-6.44	-113.819	9.13	4	23
YMR105C	-6.59	-101.156	9.14	4	7
YNL007C	-4.62	-47.8328	8.38	4	21
YJL034W	0.24	-29.1301	21.87	8	23
YLR216C	-3.54	-42.6105	9.84	4	19
YHR174W	4.67	-25.2596	59.17	11	23
YGR103W	2.38	44.2028	7.33	4	18
YNL064C	0.11	-40.4657	13.09	5	23
YLR259C	0.92	-18.8087	29.74	8	23
YLL026W	-10.48	-61.7826	14.52	4	21
YGL055W	-6.17	43.0071	7	4	16
YCL050C	1.77	-30.9334	8.57	4	23
YJR045C	1.39	-17.301	27.26	4	23
YDL065C	-1.06	71.8159	8.83	4	6
YLR384C	-0.78	-76.3728	8.75	4	8
YCR012W	0.58	-22.5385	51.87	15	23
YJR014W	-0.55	-47.7656	5.33	4	6
YHR208W	3.21	-41.1845	7.62	4	16
YDL058W	-1.14	45.423	13.25	5	4
YLR304C	-2.25	29.5551	19.83	4	23
YBL099W	-2.48	21.6991	23.1	8	21
YDR155C	0.22	-23.3021	16.52	4	23
YPL004C	-2.67	24.7829	10.32	4	19
YPL061W	2.52	-16.5042	24.57	10	23
YAL003W	-1.46	-19.3825	21.52	5	23
YMR145C	-3.35	21.7384	14.14	7	22
YGR218W	-0.8	66.6493	10.67	4	6
YLR438W	-4.8	-121.16	6	4	3
YMR318C	5.53	47.8315	12.1	4	21
YOL111C	-0.44	-77.5027	7	4	6
YHR010W	5.31	41.7594	5.25	4	4
YLR249W	0	9.49157	54.83	11	23
YGL009C	1.54	-50.642	9.05	4	20
YPR191W	-0.55	24.2114	12.62	4	21
YER125W	1.54	42.0539	5.83	4	6
YNL281W	0.44	-28.0193	7.75	4	8
YLR056W	-2.18	47.207	5.33	4	6
YGR244C	-4.34	29.6016	9.05	4	22
YNL055C	-2.75	24.1479	20.26	7	23
YAL060W	1.76	-59.5146	11	4	6
YDR214W	-2.41	-32.9683	7.38	4	16
YKL182W	-4.04	8.63606	62.35	21	23
YHR183W	0.9	15.2131	16.91	4	23
YLR432W	5.6	34.293	9.67	4	18
YNL141W	4.05	-36.491	9	4	5
YDL052C	3.07	48.2011	4.4	4	5
YMR173W	-5.38	-118.534	7.2	4	10
YLR276C	2.26	44.3708	14.67	4	3
YHR179W	1.92	37.2401	6.2	4	5
YBL030C	-1.18	21.9695	14	5	23
YMR012W	2.96	14.0805	22.35	9	23
YJR121W	-1.94	16.8181	20.87	4	23
YBL045C	-3.09	23.2615	11.65	4	20
YPR160W	-11.54	30.8924	7.67	4	3
YKL085W	-4.16	28.5786	12.04	4	23
YOR375C	1.97	-16.5472	15.7	7	23
YIL053W	2.55	-19.9211	10.77	4	22
YOR142W	0.66	23.5317	12.62	4	21
YIL051C	1.75	19.5635	10.64	4	22
YAL042W	1.02	41.8962	4.75	4	4
YER048C	-1.59	22.2209	7.28	4	18
YOR298C-A	-5.12	-41.5582	9.11	4	9
YOR063W	0.79	11.7807	43.09	6	23
YKL152C	-1.02	-23.2353	22.86	4	22
YPL262W	-3.58	17.9419	8.29	4	21
YML086C	1.31	32.4519	7.25	4	8
YLR028C	-2.19	54.6177	8.06	4	16
YNL061W	0.56	39.8949	6.06	4	16
YCR084C	1.42	28.7561	6.4	4	15
YLR038C	-1.21	28.0815	5.45	4	11
YJR009C	7.37	-27.5227	4.5	4	8
YNL134C	-2.39	26.1035	9.33	4	12
YFR033C	-7.06	45.7842	5.89	4	9
YJR109C	-4.35	-14.6147	19.91	10	23
YJL130C	-0.85	-17.7094	27	9	23
YHR146W	-1.98	22.7139	7.58	4	12
YAL023C	2.95	24.5872	5	4	6
YBR196C	1.34	-15.0961	31.78	15	23
YOR341W	2.58	10.618	15.48	5	23
YBR025C	3.21	-12.7608	13.43	5	23
YPL111W	1.98	-26.4442	6.79	4	14
YER086W	3.32	19.6473	7.2	4	10
YIL094C	-1.03	35.1747	6.62	4	8
YJL121C	2.44	28.481	9	4	7
YBL032W	3.64	-60.5451	7.33	4	3
YER006W	1.59	29.754	7.47	4	17
YHR027C	-2.77	-16.1227	9.7	4	20
YLR197W	6.12	10.4203	14.83	6	23
YOL027C	-0.74	31.4154	7	4	10
YGR157W	-0.4	-41.3626	10.4	4	5
YGL195W	2.74	13.2525	15.43	5	23
YLR335W	-0.76	-12.7767	10.09	4	11
YOR374W	-6.85	42.0872	22.65	6	23
YNL132W	3.09	23.2992	8.1	4	10
YOR270C	1.54	21.5659	6.67	4	6
YNL239W	-0.12	45.8311	10.3	4	10
YNL175C	4.23	24.4877	8.71	4	7
YLR106C	0.43	42.3399	11.33	4	12
YPL117C	0.1	-19.8366	7.07	4	15
YOR120W	-7.32	51.3194	17.41	5	17
YFR044C	-1.24	19.6713	10.52	4	21
YBR109C	0.68	-18.3037	7.93	4	15
YGL253W	3.81	7.62598	27.83	8	23
YGR193C	0.89	-30.1801	7.89	4	9
YNL189W	1.56	27.0633	5.12	4	8
YKL060C	-0.36	-10.6842	39.43	6	23
YOR198C	-0.62	-8.45852	15.96	4	23
YOL041C	0.18	-29.6727	5	4	8
YNR001C	-3.08	21.3766	9.41	4	17
YMR315W	2.32	-30.8167	6.71	4	17
YNL243W	-1.19	30.4045	8.8	4	5
YDR002W	0.81	-20.4119	7.31	4	16
YJL153C	-13.61	-26.4139	9.75	4	8
YOR136W	-0.8	19.5146	9	5	20
YLR060W	2.65	9.63638	12.43	4	21
YFR051C	0.9	35.2535	4.25	4	4
YNL037C	-2.04	28.3197	6	4	12
YOR007C	-4.61	-15.5198	15.26	4	23
YPR069C	3.62	16.335	11.14	4	21
YLR314C	0.87	16.9578	8.19	4	16
YFL018C	-2.84	11.0788	20.61	9	23
YBL050W	-1.29	-18.733	9.6	5	5
YDR158W	-2.31	-12.0779	10.27	4	22
YER025W	3.5	10.3428	13.43	5	21
YKL157W	-1.83	-19.1421	10.35	4	17
YPL271W	-3.56	38.5488	7.75	4	4
YGL037C	-5.3	-20.7832	7.36	4	14
YER090W	0.49	23.747	7.82	4	17
YFL045C	5.41	-16.0168	10.14	5	21
YKL104C	0.55	-21.994	7.27	4	11
YOR176W	1.08	18.647	7	5	5
YML028W	0.61	17.1268	7.31	4	16
YDL022W	-2.5	-35.6444	6.93	4	15
YDL097C	-1.6	-21.493	8.22	4	9
YHR039C-A	0.01	-25.4727	7.11	4	9
YIL125W	-4.2	11.1039	11.45	4	20
YML085C	1.31	21.9293	6.55	4	11
YPL231W	-4.31	4.32404	84.61	26	23
YJL123C	-2.41	-17.0196	8.18	4	11
YHL015W	4.5	-12.056	11.15	4	20
YOR259C	-0.94	-17.7278	9	4	6
YNR016C	-5.36	7.18072	78.3	26	23
YDL143W	1.4	21.1795	6.57	4	14
YML056C	9.94	19.5997	8.33	4	15
YCL057W	0.03	-18.7658	9.92	4	13
YOR187W	1.97	18.6042	7	4	18
YGL234W	2.25	-18.2719	8.89	4	19
YDR298C	-3.2	12.0781	12.22	4	23
YKL148C	-5.34	25.8932	10.31	4	16
YGL137W	-1	12.8664	7.74	4	19
YPL078C	-3.44	15.3422	9.1	4	20
YLR167W	-0.38	24.6676	6.8	4	10
YOR310C	7.16	13.381	9.95	4	22
YER049W	2.91	-25.505	7	5	5
YDL168W	0.57	-17.5373	6.85	4	13
YER055C	3.03	35.0393	5.5	4	4
YPL093W	2.21	15.6316	8.84	4	19
YDL213C	1.98	-26.4092	4	4	3
YGR254W	2.69	-37.2714	8.44	4	16
YKL216W	4.09	29.6936	12.65	4	20
YHR007C	0.04	15.8754	11.17	4	6
YGL173C	-3.46	9.37595	15.05	5	21
YDR188W	-0.79	12.2839	8.21	4	19
YGR253C	-1.21	22.898	7.2	4	5
YML072C	2.24	31.8832	9.4	4	10
YMR131C	2.38	-21.4927	9.17	4	6
YNL098C	1.52	23.6034	7.67	4	9
YNL079C	-3.1	-7.45033	11.57	4	23
YNL241C	0.21	21.958	7.08	4	12
YER043C	2.57	7.47512	33.35	11	23
YGR185C	4.54	-9.23055	10.9	4	21
YER031C	0.67	28.3105	5.8	4	5
YHR170W	3.6	-12.72	7	4	10
YBL007C	-2.58	-42.677	15.67	5	3
YEL042W	4.79	62.0869	7.2	4	5
YIL041W	-1.16	9.85396	11.15	4	20
YPR074C	0.6	7.02012	18.96	7	23
YJL167W	-0.29	7.23609	14.57	7	23
YCR031C	7.77	26.3747	5.86	5	7
YGR211W	0.23	-12.3135	6.81	5	16
YOR206W	3.89	15.9954	6.4	4	10
YJR077C	-1.12	11.4531	12.09	4	22
YNL071W	-0.47	9.69553	10.55	4	20
YDR368W	-0.97	-22.8652	8.5	4	8
YLR200W	3.3	20.7058	5.6	4	10
YLR441C	0.95	18.5292	6.6	4	10
YER023W	1.03	15.2743	8.72	4	18
YKL024C	1.35	24.0871	5.17	4	6
YBR039W	-1.91	10.8739	10.7	4	23
YPL212C	1	-18.4895	5.86	4	7
YAL012W	3.71	-9.77107	7.95	4	22
YLR175W	4.92	15.6829	7	4	11
YLR340W	2.46	6.12564	19	8	22
YPR183W	2.05	16.8171	6.71	4	7
YOL097C	6.91	10.2563	10.33	5	21
YDR064W	3.08	15.3366	8	4	16
YGL026C	0.75	-7.58964	15.52	4	23
YDR120C	2.75	-14.9628	10.25	4	4
YPL063W	1.59	18.4447	8.89	4	9
YGL245W	0.57	-6.44473	21.87	8	23
YBL076C	0.64	6.13225	26.91	7	23
YJL080C	2.84	5.09923	26.7	11	23
YLR061W	3.66	14.9307	7.81	4	16
YOL109W	-4.62	-9.32262	10.33	4	21
YDR341C	2.72	7.82433	14.43	4	23
YMR246W	0.8	15.3354	6.43	4	7
YML126C	0.62	-8.83657	9.45	4	20
YNL247W	2.51	7.96756	14	4	22
YPR035W	0.87	-15.7384	5.75	4	8
YHR107C	-1.82	-30.2024	6.22	4	9
YKL211C	0.66	15.688	6.89	4	9
YKL127W	4.16	17.1354	8.5	4	6
YLR081W	0	0	8	4	9
YHR098C	3.03	16.6127	8	4	3
YDR148C	-4.81	19.9216	6.14	4	7
YJR139C	1.7	-6.83203	14.57	5	23
YJL041W	-0.89	14.5858	7.91	4	11
YDL208W	3.13	17.0238	5.78	4	9
YOR335C	1.32	6.77545	24.83	11	23
YOL123W	-0.07	24.3844	6.33	4	18
YER070W	3.98	18.1243	8	4	9
YBR286W	-0.59	-10.7353	9.65	4	20
YGR192C	7.31	-7.04383	31.52	4	23
YLR044C	-1.65	-6.99456	56.35	14	23
YOR239W	1.6	-35.8827	6.2	4	5
YJR064W	0.36	-9.39294	9.52	4	21
YLR257W	-4.65	-22.2734	5.27	4	11
YGR209C	-5.03	-11.2743	10.32	5	22
YDL171C	-1.79	-19.7833	10.06	4	17
YML022W	2.72	10.7146	7.75	4	8
YGR167W	1	-15.5049	6.2	4	15
YDR168W	-2.2	10.9818	9.22	4	9
YER136W	-0.24	-16.7556	8.42	4	12
YDL040C	2.5	21.0759	10.33	4	9
YNL121C	3.6	6.62213	13	4	23
YFR009W	1.51	-15.5159	7.85	4	13
YDL075W	7.68	-14.0474	8.71	4	7
YLR150W	1.5	5.69593	15.48	5	23
YDR174W	0.86	10.6363	5.2	4	15
YJL148W	5.09	-26.1823	4.5	4	6
YGR124W	1.39	8.38376	10.64	5	22
YDL226C	1.27	-14.0251	5.78	4	9
YMR229C	2.89	6.8258	17.35	5	23
YKL054C	1.05	-9.78223	8.38	4	13
YDR232W	-0.23	-18.6101	4.86	4	7
YDR071C	0.3	-8.37704	9.62	4	13
YJR070C	4.7	9.7345	8.18	5	22
YOR285W	-6.39	-11.358	8.17	4	6
YKL195W	-0.24	-12.8013	5.77	4	13
YPL235W	0.27	-25.4518	7.33	4	6
YNL096C	2.49	8.80475	9.18	4	22
YDL195W	3.13	6.1576	15.41	4	22
YAR015W	2.46	12.9417	8.75	4	8
YLR447C	-0.1	13.2736	6.12	4	8
YFL039C	0	-5.3662	19.22	5	23
YHR049W	4.94	-15.5425	5.75	4	8
YGL106W	1.29	-23.8617	17.2	4	5
YHL034C	-1.92	10.7591	8.46	4	13
YOR096W	4.34	-8.16087	11.21	4	19
YDL147W	-4.67	-12.2023	7.2	4	15
YPR110C	4.68	-11.0532	7.62	4	13
YOR272W	3.75	-17.3881	4.86	4	7
YHR051W	-0.96	-18.7211	7.33	4	6
YPL260W	-1.64	9.53668	5.75	4	12
YDL130W	-0.53	16.7818	5.33	4	12
YDL126C	-3.91	-5.05409	18.61	7	23
YFR053C	-4.12	9.13746	26.57	8	23
YNL244C	2.01	8.21149	7.12	4	8
YDL014W	8.62	6.06381	10.38	5	21
YDR500C	1.47	12.7942	5.5	4	4
YGL123W	0.51	5.74523	13	4	22
YLR208W	2.14	-13.9863	6.83	4	6
YPR145W	0.83	-7.53481	8.55	4	20
YDL185W	-0.44	-3.48648	27.39	5	23
YBR126C	-3.41	17.4153	4.86	4	7
YAL035W	1.41	4.87832	12.15	5	20
YEL034W	0.72	11.3987	12.1	4	21
YBR221C	2.98	10.5994	5.75	4	8
YJR007W	2.56	-6.8868	10.77	4	22
YMR276W	0.04	-13.2456	5.25	4	8
YBR149W	-3.85	-13.7937	6.75	4	16
YGR155W	1.22	4.2145	23.68	8	22
YOR046C	2.6	-8.75283	8.83	4	18
YBL039C	5.29	8.08106	7.64	4	22
YJL008C	2.34	5.60668	11.55	5	20
YIL075C	-0.25	-11.5149	8.39	4	18
YBL047C	-1.55	6.83802	9.09	4	22
YAL016W	-0.01	-20.7037	7.71	4	7
YGR116W	-1.07	11.3506	10.86	4	14
YJR105W	1.76	-6.56046	15.86	5	21
YDR170C	-1.82	16.4698	8	4	6
YHR052W	3.51	-20.4885	9.57	4	7
YLR244C	2.2	-7.56516	6.11	4	19
YHR037W	-0.22	-12.4594	10.83	4	6
YDL004W	-0.44	10.6102	4.43	4	7
YEL055C	1.46	15.2424	7.67	4	6
YLR359W	3.41	-8.70491	10.95	4	20
YCL040W	-5.58	5.79885	11.4	4	15
YEL031W	0.62	9.89466	10.2	4	20
YHR019C	2.63	4.68968	14.61	5	23
YBL024W	2.64	6.85445	12.17	4	18
YDL007W	-2.51	11.0538	5.82	4	11
YKL210W	-1.3	3.93136	19.96	7	23
YER003C	3.34	5.6006	12.37	4	19
YAL038W	1.6	-6.65472	42.3	5	23
YML100W	-7.33	21.0919	6.11	4	9
YGL078C	3.16	12.025	6.73	4	11
YER110C	4.78	5.90824	21.96	8	23
YOR232W	5.39	9.39587	6.17	4	12
YGR204W	1.43	-4.92577	11.95	4	21
YMR092C	0.56	-9.83755	5.83	4	6
YLR153C	-0.91	-4.70855	12.9	4	21
YLR180W	5.01	-4.58556	11.55	4	22
YGR282C	-0.13	13.1325	8.07	4	15
YHR005C-A	6.49	-19.8097	9.67	4	6
YEL024W	0.44	-8.9528	7.43	4	7
YOR204W	4.06	5.15046	13.9	4	20
YLR029C	-0.61	12.6449	6.71	4	7
YLR347C	2.23	11.4391	4.8	4	10
YDR454C	4.76	5.74658	10.95	4	20
YHR008C	-5.44	10.8819	8.17	4	12
YOR361C	2.38	-9.31085	10.78	4	18
YDR032C	-2.61	12.9491	7.44	4	9
YJL014W	0.98	5.31682	11	4	22
YIL133C	1.19	7.63807	9.28	4	18
YKL080W	2.26	6.3194	8.41	4	17
YML074C	-0.21	-20.2983	5	4	3
YDR321W	5.85	13.1384	7.56	4	9
YOL086C	2.02	-5.16336	23.3	5	23
YKL016C	-4.67	9.37591	5.75	4	12
YOR117W	-1.51	5.80968	9.68	4	22
YPL043W	3.24	12.8862	5.25	4	8
YBR106W	2.59	5.02042	11.53	4	19
YER178W	-2.42	5.96781	10.88	4	17
YBR248C	-1.24	10.8744	12.5	4	6
YEL058W	-2.24	14.1357	5.56	4	9
YLR388W	2.84	-12.2384	7.12	4	8
YMR031C	-4.96	-6.83074	8.73	4	11
YMR108W	-3.97	-5.57524	11.26	5	19
YER177W	-0.93	-10.5069	8.5	4	12
YGR229C	0.56	-11.8865	6	4	7
YKL056C	3.5	-6.56307	8.12	4	17
YGL062W	-4.85	12.0129	7.92	4	13
YOL038W	-1.86	11.5616	5.62	4	8
YGL048C	1.06	-7.77282	9.33	4	6
YOL127W	2.41	4.656	12.62	4	21
YDR050C	0.27	5.11457	22.14	5	22
YJR060W	-1.28	12.3673	6.75	4	4
YPR163C	-0.7	-8.83999	6.79	4	14
YLR448W	3.97	-4.97522	9.44	4	18
YGR090W	1.83	-10.5204	9.5	4	6
YJL026W	-2.93	-4.79713	7.38	4	21
YDL124W	-4.86	7.69204	9.15	4	20
YER122C	0.26	-6.70898	7.33	4	12
YBR143C	2.22	-4.81607	13.13	4	23
YIL078W	1.18	3.56236	23.83	6	23
YBR245C	-0.04	-8.04083	8.83	5	6
YMR205C	0.74	-4.73012	10.17	4	23
YNR043W	2.28	9.05458	6.62	4	13
YMR226C	-1.83	-6.54196	9.71	4	21
YCR088W	-1.76	5.0466	12.17	5	18
YKL035W	-0.78	-5.4004	11.05	4	21
YGL105W	1.32	3.3349	13.23	7	22
YBL058W	-1.45	7.77352	4.44	4	9
YDR127W	0.14	3.31569	16.26	6	23
YMR083W	0.27	6.1617	8.55	4	11
YGR135W	-1.4	8.59188	6.55	4	11
YKL196C	-2.32	14.4342	7.3	4	10
YBR127C	-0.54	4.31917	12	4	21
YLR196W	4.18	-8.84465	7.67	4	9
YER165W	0.93	-2.96618	29.22	12	23
YKL142W	-5.54	-9.84964	5.88	4	16
YOR168W	1.86	3.55052	15.26	7	23
YIL142W	-0.18	4.86219	8	4	19
YGL030W	0.75	6.82123	8.94	4	18
YFL038C	-2.74	7.01344	7.36	4	11
YIL043C	0.61	-7.50203	10.5	4	6
YMR290C	4.81	7.90475	5.22	4	9
YIL109C	0.4	5.51875	7.17	4	12
YLL050C	3.8	5.41192	8.87	4	15
YGL206C	-1.57	3.96823	20.04	6	23
YPL154C	-3.76	-7.12426	6.8	4	20
YHR193C	0.53	5.19459	9.35	4	20
YGR037C	-0.66	-5.99168	8.29	4	14
YLR185W	1.12	8.40777	7	4	7
YML106W	-2.69	5.99672	7.69	4	16
YMR146C	1.65	-4.76572	8.94	4	18
YBR154C	3.56	6.7992	5.56	4	9
YDL153C	0.5	-10.1036	5	4	3
YDL055C	0.65	4.84457	15.57	6	23
YDL100C	0.96	4.50231	11.57	4	21
YDL029W	2.13	-14.038	7	4	9
YHR020W	2	2.6372	21.26	7	23
YER036C	2.38	-3.70862	12.95	6	21
YMR217W	3.32	3.27019	15.09	7	23
YDR353W	2.33	-3.79858	10.83	5	23
YNL016W	3.73	-13.3541	10	4	4
YMR314W	-1.72	-7.1172	6.15	4	13
YLR355C	2.31	-6.33215	18.87	5	23
YBR177C	-1.25	7.4713	6.07	4	14
YMR307W	1.23	6.21313	9.76	4	21
YBR218C	-0.09	7.4033	7	4	4
YNL220W	3.19	10.0086	8.75	4	8
YBR249C	0.99	5.51216	9.26	4	19
YPL028W	-1.09	-3.32968	12.5	4	22
YER120W	0.12	5.7493	8.18	4	17
YCL043C	1.11	-3.22815	19.35	7	23
YOR332W	-2.15	-3.15845	15.62	6	21
YLR342W	3.5	5.00007	6.24	4	17
YDR172W	1.15	-4.93781	11.35	4	20
YDR101C	4.7	6.52816	5.53	4	15
YOR230W	-2.81	-5.57338	7	4	13
YFR004W	-1.78	-8.40404	9.75	5	4
YCR053W	2.71	2.42804	16.87	5	23
YBL092W	2.07	-3.40146	12.43	4	23
YKR048C	-1.95	4.65171	6.29	4	21
YPR108W	-1.44	-8.65267	6.75	4	8
YGL148W	2.19	-3.00538	14.64	4	22
YBL091C	-0.79	-10.5413	6.57	4	7
YML008C	1.34	3.65601	12.27	4	22
YOR151C	1.03	-5.81007	6	4	7
YGR285C	1.25	2.75471	15.36	4	22
YGL207W	-2.98	5.35968	8.86	4	14
YGL103W	-1.98	3.23925	11.64	4	22
YIL138C	-1	-3.60728	6.05	4	20
YLR325C	6.75	5.17443	10.27	4	15
YDL078C	-5.4	5.50912	7.44	4	9
YMR099C	1.17	5.14492	9	4	15
YPL237W	3	4.47237	7.79	4	14
YDR035W	0.54	6.0046	6.46	4	13
YOR209C	-0.56	-6.54353	10	4	13
YDR037W	0.96	-2.4025	16.91	5	23
YOL061W	2.48	8.09187	5.33	4	9
YKR001C	-1.01	4.09734	11.59	4	22
YGL097W	3.08	-7.57815	5.4	4	5
YBR263W	1.44	3.4172	9.5	4	22
YHR089C	6.68	6.98749	5.25	4	4
YGR130C	-4.82	-5.46367	7.83	4	6
YML092C	1.08	-4.0341	9.38	4	8
YDL103C	0.25	-6.19388	7.92	4	12
YGR094W	1.5	2.04348	27.78	11	23
YDL140C	0.34	-5.31208	8.33	4	15
YDR129C	-1.7	-2.90588	14.73	4	22
YMR116C	2.79	2.15949	25	4	23
YMR027W	-3.04	-4.66959	8.4	4	5
YPL012W	2.7	-7.59719	7.57	4	7
YOR369C	3.42	-2.42963	12.8	5	20
YGR159C	2.89	3.9068	6.22	4	18
YNL112W	4.07	3.92094	7.31	4	16
YOR323C	-0.02	3.28402	11.95	4	20
YBL022C	-2.58	-5.36868	9.57	4	7
YDR212W	0.92	-3.53762	9.62	4	16
YFL022C	3.74	-2.14612	12.61	5	23
YOR317W	-0.74	2.51989	11.86	4	22
YDL084W	3.83	2.40678	13.17	4	23
YOR184W	3.01	-3.77194	6.71	4	17
YLR058C	3.58	-3.05577	14.82	6	22
YNL287W	0.39	2.78491	8.8	6	20
YLR075W	-3.33	-2.82062	10.53	4	19
YDR033W	-3.72	-7.14733	11	4	5
YLR027C	-2.15	2.99163	12.25	4	20
YFL014W	-13.75	-7.91535	8.29	4	21
YER133W	-0.84	-5.56072	5.67	4	6
YLL045C	3.42	3.09276	9.85	4	20
YIL033C	-1.66	-7.07006	8.43	4	7
YDR529C	0.27	-4.17489	8.14	4	7
YBR088C	4.82	4.46825	8.36	4	14
YGL011C	-0.31	3.01805	7.47	4	17
YDR432W	4.04	-4.12715	6.14	4	7
YPL239W	-0.15	-4.34597	5.71	4	14
YLL018C	-0.12	-2.14192	15.78	5	23
YDR226W	0.94	-1.85563	17.27	4	22
YDR346C	0.44	5.70375	6.14	4	7
YPL226W	2.38	2.5272	11.71	4	21
YDL131W	1.68	-5.74457	4	4	6
YPR041W	5.58	-1.65217	15.13	5	23
YPL048W	-0.59	4.25688	8.14	4	14
YER062C	-1.88	3.97449	7.12	4	8
YPR181C	2.5	-3.13594	8.33	4	15
YGL008C	-1.87	2.69589	7.88	4	16
YKR092C	5.53	-4.96766	4.4	4	5
YDL125C	1.24	-4.51201	9.3	4	10
YOL039W	9.38	-1.9814	10.52	4	23
YFR037C	-0.88	-3.85051	6.92	4	12
YNL010W	4.27	-1.99041	9.91	4	22
YBR049C	-0.24	5.04784	7.67	4	3
YGR162W	1.69	-1.49711	13.45	4	22
YDL095W	2.83	-7.23378	7	4	3
YPL160W	-0.44	1.23821	20.61	6	23
YGR086C	-2.55	-3.3448	9	5	17
YDR304C	0.61	-4.73775	7.36	4	11
YGR054W	2.94	3.54377	9.25	4	12
YGL099W	2.46	-2.70359	5.7	4	10
YDL066W	1.74	-2.33815	9.35	4	20
YDL081C	9.09	-3.26737	9.75	4	16
YPR010C	4.75	3.49664	8.67	4	12
YML048W	1.02	2.58624	7.83	4	6
YJR123W	0.87	1.698	9.68	4	19
YDR233C	3.37	-2.39402	9.61	4	18
YKL145W	-2.97	-3.70952	7.25	4	4
YNL308C	0.03	5.42539	4.8	4	5
YCL037C	6.3	-2.74336	7.45	4	20
YOR061W	1.38	7.12823	6.6	4	5
YNL248C	6.38	2.87307	6.14	4	7
YLR179C	-0.22	-2.0824	9.38	4	13
YKL081W	3.64	1.3667	13.96	4	23
YDR502C	2.78	1.7908	11	4	21
YER057C	2.75	-3.91414	8.38	4	8
YFL005W	-1.16	-2.3683	7.35	4	17
YGR061C	3.38	1.2043	14.78	4	23
YMR309C	2.87	1.30081	11.38	4	21
YMR072W	-3.11	1.83657	7.76	4	21
YER091C	3.84	0.974049	41.26	11	23
YIL076W	2.43	2.69628	9.8	4	5
YPR028W	3.14	-2.1673	7	4	8
YHR128W	8.12	-2.55161	5.2	4	10
YIL022W	0.87	4.3167	6	4	5
YIR006C	0.65	2.20269	6.46	4	13
YOR265W	-0.75	-2.83796	7.8	4	5
YOL139C	1.26	-1.68204	7.06	4	18
YPR129W	1.83	3.72846	5.5	4	4
YGR180C	-1.7	-1.11404	10.04	4	23
YBR121C	1.89	0.803637	21.52	5	23
YDR238C	-1.02	-2.98215	7.25	4	8
YHR108W	1.71	-1.81846	7.83	4	6
YEL047C	2.81	-4.15779	9.22	4	9
YLR429W	-0.58	-1.93404	6.91	4	11
YJR104C	-0.86	-1.19332	13.11	5	19
YBR084W	3.56	1.38276	9.09	4	11
YHR064C	3.42	0.771851	21.96	4	23
YOL040C	3.07	1.42432	7.27	4	15
YMR260C	4.05	-1.93605	7	4	14
YNL138W	-0.74	-1.11471	10.68	4	22
YLR354C	0.21	0.724018	16.91	6	23
YEL060C	-7.03	-1.94385	7.2	4	5
YGR240C	0.12	0.606557	23.04	7	23
YER021W	-1.43	2.06444	8.2	4	5
YJL111W	0.73	-1.62103	10.23	4	13
YDL145C	2.31	1.15514	9.33	4	21
YKL172W	1.77	1.4017	6.17	4	12
YMR235C	1.57	-1.48665	9.61	4	18
UBIQUITIN	0	0	10.37	4	19
YGR234W	1.86	-1.50683	13.95	5	22
YDR150W	-2.11	1.32559	11.11	4	9
YJL050W	2.49	1.02262	6.8	4	5
YPL131W	2.31	0.797034	9.44	4	18
YNL069C	0.88	0.667364	8.09	4	22
YDR429C	2.11	-1.52964	4.88	4	8
YJR065C	0.64	-1.0206	6.89	4	9
YPR036W	0.34	0.942339	11.05	4	19
YJR016C	0.3	-0.939521	10.24	4	21
YKL150W	-4.48	-0.851185	11.37	4	19
YOR020C	1.66	-1.07444	9.12	4	16
YLR301W	3.86	-1.15972	6.5	4	14
YBR078W	-0.74	1.07924	8.2	4	5
YDR381W	-1.95	0.689308	8.63	4	19
YEL046C	-2.33	-0.621634	9.25	4	20
YPL037C	4.75	0.652648	9.07	4	15
YBR018C	0	0	14.56	5	16
YGL202W	0.9	0.466212	11.75	4	20
YNL178W	2.58	0.364956	10.15	4	20
YJR002W	0.74	-1.11612	6.8	4	5
YNL135C	0.68	0.419376	10.25	4	20
YHL033C	4.31	0.469354	7.86	4	14
YJL020C	0	0	6.8	4	10
YMR079W	4.23	0.476193	10.85	4	13
YDR382W	3.83	-0.279911	8.6	4	20
YDR190C	1.73	0.513361	7.33	4	9
YPL091W	0.36	0.479084	9.83	4	18
YBR011C	1.59	0.187601	17.48	5	23
YFR010W	-1.36	-0.402545	7.56	4	18
YPR033C	1.83	-0.333851	7.93	4	14
YFR052W	-0.91	0.444419	7.75	4	8
YOR326W	0.22	-0.678172	9.83	4	6
YBR079C	2.51	0.137517	23.43	8	23
YPL225W	-3.78	-0.529382	9.33	4	12
YPR133C	-1.68	-0.262995	5.12	4	8
YML070W	-1.86	-0.187128	10.32	4	22
YMR203W	4.33	0.400044	7.89	5	9
YLR192C	2.31	-0.185916	6.75	4	12
YGR264C	3.72	-0.081527	16.39	6	23
YHR068W	7.21	0.0830543	8.22	4	23
YLR043C	4.34	-0.0733607	10.09	4	22
YPL145C	-0.07	0.0865182	9.24	4	17
YML073C	2.01	-0.0527589	8.6	4	15
YDR023W	3.18	0.0236545	17	4	23
