# Supplementary material for: Quantifying Condition-Dependent Intracellular Protein Levels Enables High-Precision Fitness Estimates
Source: PLoS One. 2013 Sep 25;8(9):e75320. doi: 10.1371/journal.pone.0075320 (PMC3783400; doi:10.1371/journal.pone.0075320)
Supplement: Table S6 — Protein functional categories overrepresented among proteins that covary with growth. (XLSX) [file pone.0075320.s011.xlsx]

## Sheet: Sheet1
Functional Category	Corrected p-value	Number of proteins
Positively covary with growth
oxidation-reduction process	9.40282e-09	23
single-organism metabolic process	3.25652e-08	37
energy derivation by oxidation of organic compounds	1.82654e-06	13
cellular respiration	4.02148e-06	11
aerobic respiration	4.23385e-06	10
generation of precursor metabolites and energy	1.21586e-05	14
cellular process	0.000228062	68
metabolic process	0.000388145	61
small molecule metabolic process	0.000643949	24
cellular metabolic process	0.00210308	58
tricarboxylic acid cycle	0.00445763	5
Negatively covary with growth
protein refolding	7.7602e-11	9
protein folding	9.15631e-08	14
small molecule metabolic process	6.18465e-06	32
single-organism metabolic process	6.46336e-06	40
organic substance catabolic process	6.96426e-06	30
metabolic process	1.11803e-05	79
organonitrogen compound metabolic process	1.80953e-05	28
cellular metabolic process	3.19465e-05	76
cellular process	4.12538e-05	87
organic substance metabolic process	6.80182e-05	75
glycolysis	8.11468e-05	7
catabolic process	0.000116955	30
glucose catabolic process	0.000163593	8
nucleoside phosphate metabolic process	0.000169222	17
hexose catabolic process	0.000384347	8
nucleoside monophosphate biosynthetic process	0.000392859	7
nucleoside monophosphate metabolic process	0.000466541	7
primary metabolic process	0.000554948	72
nucleobase-containing small molecule metabolic process	0.000622616	17
nucleotide metabolic process	0.000685099	16
monosaccharide catabolic process	0.000925111	8
response to stress	0.00114069	26
organophosphate metabolic process	0.00116941	20
small molecule biosynthetic process	0.00146099	16
single-organism biosynthetic process	0.00158389	16
alpha-amino acid metabolic process	0.0015935	12
oxidation-reduction process	0.00170994	19
organonitrogen compound biosynthetic process	0.00306324	17
ribonucleoside monophosphate biosynthetic process	0.00350084	6
purine nucleoside monophosphate biosynthetic process	0.00378315	5
ribonucleoside monophosphate metabolic process	0.00411458	6
'de novo' protein folding	0.00427978	4
purine nucleoside monophosphate metabolic process	0.00478524	5
carboxylic acid metabolic process	0.00584753	17
oxoacid metabolic process	0.00917556	17
cellular amino acid metabolic process	0.00921543	14
organic acid metabolic process	0.00946812	17
