# Supplementary material for: Quantifying Condition-Dependent Intracellular Protein Levels Enables High-Precision Fitness Estimates
Source: PLoS One. 2013 Sep 25;8(9):e75320. doi: 10.1371/journal.pone.0075320 (PMC3783400; doi:10.1371/journal.pone.0075320)
Supplement: Table S7 — Using a likelihood ratio test with p-value cutoff set to 0.05, we find these proteins covary with growth across a minimum of three strain pairs. (XLSX) [file pone.0075320.s012.xlsx]

## Sheet: LRT_3req.csv
Systematic name	log.pval	direction
YIL053W	-3.31032	-1
YPL061W	-3.58	-1
YIL043C	-3.67967	-1
YDR033W	-3.87632	-1
YOL109W	-4.05339	-1
YDR158W	-4.08265	-1
YMR027W	-4.43488	-1
YJR002W	-4.70207	-1
YER049W	-5.21772	-1
YDR155C	-5.34091	-1
YLR109W	-5.98982	-1
YNL220W	-6.5024	-1
YOR375C	-6.63934	-1
YNL141W	-7.27163	-1
YHR208W	-7.28881	-1
YDR214W	-7.54116	-1
YBR196C	-8.19681	-1
YAL003W	-8.74977	-1
YKL152C	-9.45616	-1
YGR254W	-10.1128	-1
YCL050C	-10.4331	-1
YJR014W	-13.3638	-1
YDL022W	-13.9758	-1
YLR216C	-14.4219	-1
YNL036W	-16.423	-1
YGR090W	-17.7772	-1
YGL009C	-19.3171	-1
YOR259C	-19.3207	-1
YOR272W	-20.7049	-1
YMR173W	-21.2045	-1
YLR259C	-23.6845	-1
YCR012W	-23.8232	-1
YAL060W	-23.9003	-1
YJL130C	-24.8972	-1
YJR045C	-26.2615	-1
YGL106W	-26.6244	-1
YLR438W	-28.5843	-1
YPL240C	-31.8965	-1
YLR335W	-33.6426	-1
YHR170W	-35.9459	-1
YGR157W	-36.5288	-1
YJL034W	-36.9948	-1
YNL007C	-37.79	-1
YNL064C	-38.1904	-1
YHR174W	-40.1829	-1
YLR384C	-43.7778	-1
YLL026W	-49.298	-1
YPL106C	-56.7219	-1
YMR186W	-57.8862	-1
YBR248C	-65.0332	-1
YLL024C	-89.9011	-1
YAL005C	-100.009	-1
YOR027W	-119.022	-1
YPL262W	-3.06764	1
YGR218W	-3.10466	1
YPL004C	-3.15071	1
YER043C	-3.18258	1
YFL018C	-3.21393	1
YML072C	-3.25651	1
YOR265W	-3.29606	1
YLR061W	-3.35948	1
YML085C	-3.582	1
YDR454C	-3.61916	1
YDR148C	-4.24276	1
YNL098C	-4.3324	1
YOR142W	-4.62617	1
YIL051C	-4.71549	1
YKL182W	-5.10266	1
YHR049W	-5.39945	1
YLR276C	-5.42769	1
YPR160W	-5.52006	1
YNR016C	-5.62095	1
YLR167W	-5.85548	1
YBL007C	-5.87012	1
YBL045C	-5.88485	1
YFR033C	-6.41053	1
YNL239W	-6.48469	1
YFL038C	-6.56258	1
YLR028C	-6.71642	1
YPR191W	-6.90234	1
YLR249W	-7.36746	1
YBL030C	-7.42143	1
YMR145C	-7.71656	1
YGL055W	-7.98252	1
YMR318C	-8.99391	1
YKL085W	-9.79165	1
YPR183W	-10.5136	1
YGR103W	-12.4711	1
YER086W	-12.7772	1
YLR304C	-12.9652	1
YEL042W	-13.2297	1
YBL099W	-13.9344	1
YOR063W	-13.9644	1
YLR196W	-15.1054	1
YBR049C	-15.3362	1
YHR183W	-17.0919	1
YFR004W	-18.2754	1
YBR084W	-19.0581	1
YHR007C	-19.084	1
YNL055C	-21.8968	1
YDR168W	-21.9668	1
YDL065C	-22.0765	1
YHR108W	-23.508	1
YBL022C	-24.9274	1
YDL058W	-26.9266	1
YML086C	-29.6274	1
YPL063W	-32.2425	1
YBR245C	-36.8589	1
YNL175C	-62.5419	1
