# Supplementary material for: Quantifying Condition-Dependent Intracellular Protein Levels Enables High-Precision Fitness Estimates
Source: PLoS One. 2013 Sep 25;8(9):e75320. doi: 10.1371/journal.pone.0075320 (PMC3783400; doi:10.1371/journal.pone.0075320)
Supplement: Table S9 — From each replicate experiment, we filter proteins for which abundance was measured fewer than 4 times. This does not dramatically change precision or accuracy, however, does lead to a greater number of proteins being used to predict growth. (XLSX) [file pone.0075320.s014.xlsx]

## Sheet: Sheet1
Abundance Measurements per Protein per Mass Spectrometry Experiment	Predictions within one standard deviation of experimental error	Standard deviation on speedometer predictions	Number of proteins used to make prediction	R2 cutoff
1	5 of 5	0.21	38	0.44
2	4 of 5	0.23	38	0.45
3	4 of 5	0.23	40	0.43
4	5 fo 5	0.24	53	0.37
5	5 of 5	0.23	36	0.45
